# Supplementary material for: LINE-1 and Alu methylation signatures in autism spectrum disorder and their associations with the expression of autism-related genes
Source: PubMed Central journal article supplement (PMC9385849; doi:10.1038/s41598-022-18232-6), 2022-08-17
Supplement: 41598_2022_18232_MOESM1_ESM.pdf [file 41598_2022_18232_MOESM1_ESM.pdf]

LINE-1 and *Alu* methylation signatures in autism spectrum disorder and their associations with the expression of autism-related genes

Thanit Saeliw<sup>1</sup>, Tiravut Permpoon<sup>2</sup>, Nutta Iadsee<sup>2</sup>, Tewin Tencomnao<sup>3,4</sup>, Valerie W. Hu<sup>5</sup>, Tewarit Sarachana<sup>4,6</sup>, Daniel Green<sup>7</sup>, Chanachai Sae-Lee\*<sup>2</sup>

<sup>1</sup>The Ph.D. Program in Clinical Biochemistry and Molecular Medicine, Department of Clinical Chemistry, Faculty of Allied Health Sciences, Chulalongkorn University, Bangkok, Thailand

<sup>2</sup>Research division, Faculty of Medicine Siriraj Hospital, Mahidol University, Bangkok, Thailand

<sup>3</sup>Natural Products for Neuroprotection and Anti-Ageing Research Unit, Chulalongkorn University, Bangkok, Thailand

<sup>4</sup>Department of Clinical Chemistry, Faculty of Allied health Sciences, Chulalongkorn University, Bangkok, Thailand

<sup>5</sup>Department of Biochemistry and Molecular Medicine, School of Medicine and Health Sciences, The George Washington University, Washington, DC 20052, USA

<sup>6</sup>SYstems Neuroscience of Autism and PSYchiatric Disorders (SYNAPS) Research Unit, Department of Clinical Chemistry, Faculty of Allied Health Sciences, Chulalongkorn University, Bangkok, Thailand

<sup>7</sup>Institute of Life Course and Medical Sciences, Faculty of Health and Life Sciences, University of Liverpool, Liverpool, United Kingdom

\*Corresponding author:

Chanachai Sae-Lee (CS), Ph.D.: 809, 8<sup>th</sup> floor, SiMR, Faculty of Medicine Siriraj Hospital,  
Mahidol University, Bangkok, Thailand

Tel., e-mail: +66611922353, [chanachai.sae@mahidol.ac.th](mailto:chanachai.sae@mahidol.ac.th)

E-mail Addresses of Co-authors:

TSae e-mail: [6271004937@student.chula.ac.th](mailto:6271004937@student.chula.ac.th)

TP e-mail: [tiravut.perm@gmail.com](mailto:tiravut.perm@gmail.com)

NI e-mail: [nutta.i@kkumail.com](mailto:nutta.i@kkumail.com)

TT e-mail: [tewintencomnao@gmail.com](mailto:tewintencomnao@gmail.com)

VWH e-mail: [valhu@gwu.edu](mailto:valhu@gwu.edu)

TS e-mail: [tewarit.sa@chula.ac.th](mailto:tewarit.sa@chula.ac.th)

DG e-mail: [daniel.green@liverpool.ac.uk](mailto:daniel.green@liverpool.ac.uk)

**Supplementary Fig. S1.** Methylation of repetitive elements (LINE-1 and *Alu*) in non-ASD (n = 48) and ASD patients who carry 16p11.2 deletions (n = 7). Total DNA methylation (a). Volcano plots of mean change in methylation ( $\Delta\beta$ ) of LINE-1 (b) and *Alu* (c) against  $-\log_{10}$  FDR-adjusted p-value ( $P_{\text{FDR}}$ ) of ASD compared with non-ASD; the green line represents  $P_{\text{FDR}} = 0.05$ , the red line represents 10% of methylation changes, green dots represent hypomethylation loci, and orange dots represent hypermethylation loci. Changes in DNA methylation ( $\Delta\beta$ ) of ASD with 16p11.2 deletion compared with non-ASD by a subfamily of LINE-1 (d) and *Alu* (e). Mean  $\pm$  SD.

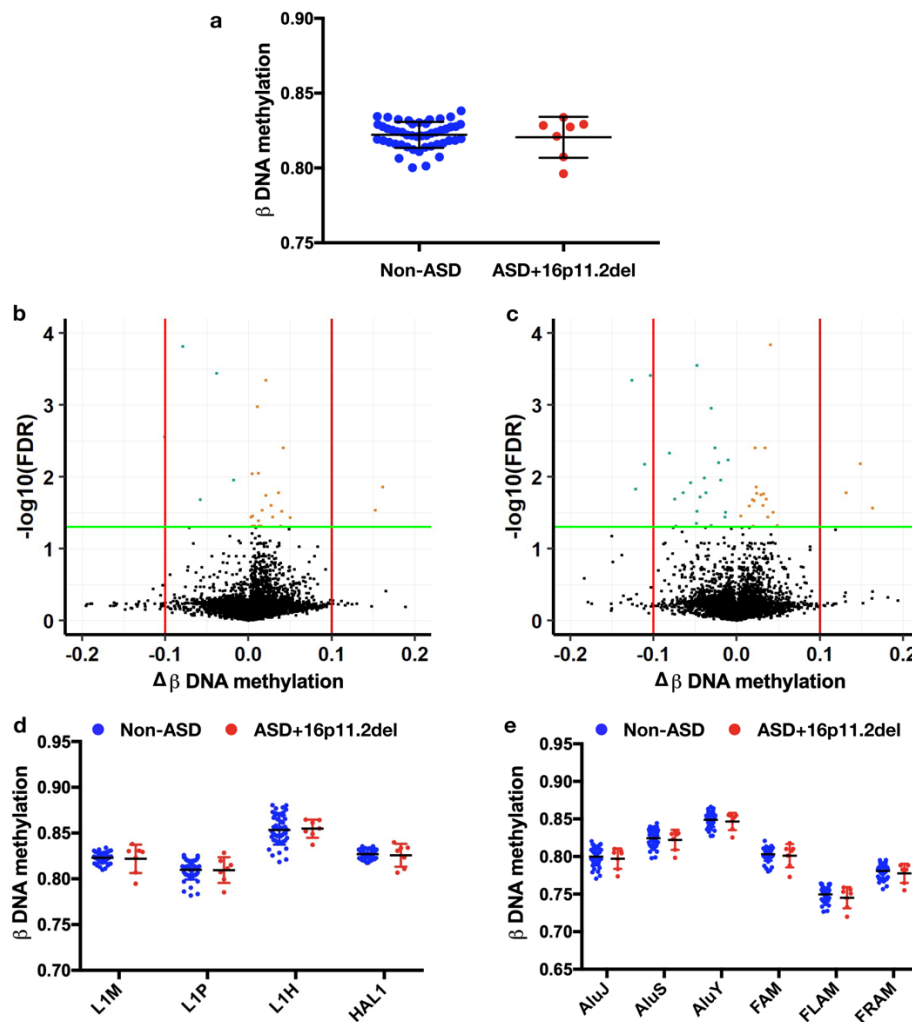

**Supplementary Fig. S2.** Methylation of LINE-1 elements by genomic feature in non-ASD (n = 48) and ASD (n = 52). Methylation levels ( $\beta$ ) of LINE-1 probes by subfamily and genomic feature, as reported by the Illumina annotation (a). These probes were mapped to within 1,500 or 200 bases of the transcriptional start site (TSS1500, TSS200), the 5' untranslated region (5'UTR), first exon (1st exon), gene body (Body) and 3' untranslated region (3'UTR). The difference of methylation levels of each genomic location between ASD and non-ASD (b). Lines indicate median values, boxes the interquartile range (IQR), whiskers the highest and lowest values within  $1.5 \times \text{IQR}$ , and outliers are displayed as individual points.

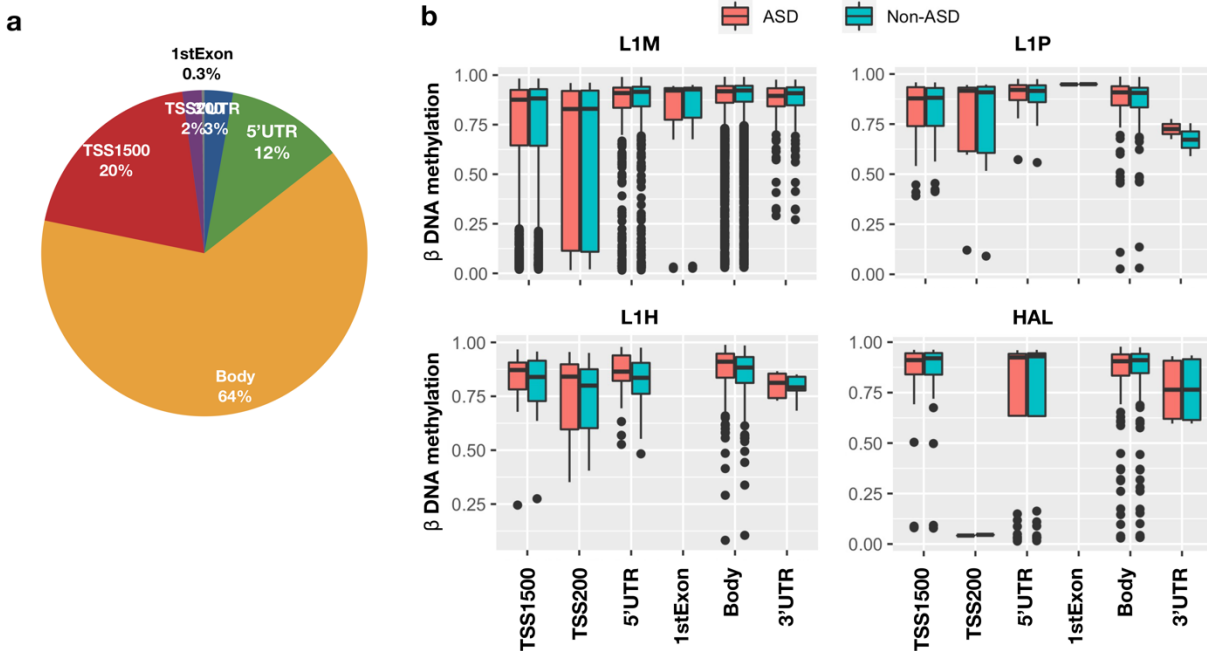

**Supplementary Fig. S3.** Methylation of *Alu* elements by genomic feature in non-ASD (n = 48) and ASD (n = 52). Methylation levels ( $\beta$ ) of *Alu* probes by subfamily and genomic feature, as reported by the Illumina annotation (a). These probes were mapped to within 1,500 or 200 bases of the transcriptional start site (TSS1500, TSS200), the 5' untranslated (5'UTR), first exon (1st exon), gene body (Body) and 3' untranslated region (3'UTR). The difference of methylation levels of each genomic location between ASD and non-ASD (b). Lines indicate median values, boxes the interquartile range (IQR), whiskers the highest and lowest values within 1.5×IQR, and outliers are displayed as individual points.

**a**

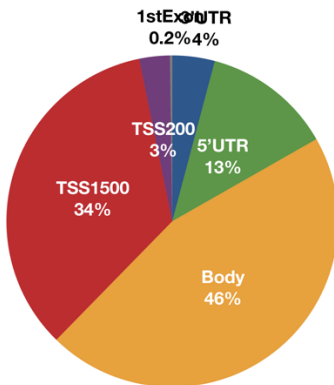

**b**

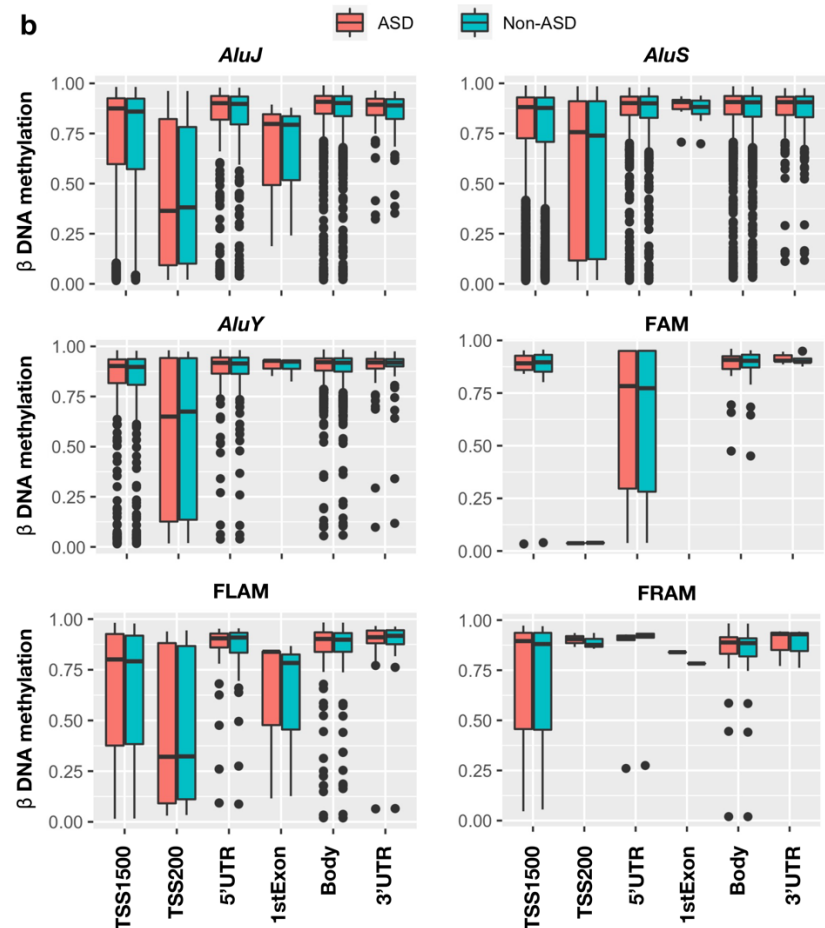

**Supplementary Fig. S4.** Significant differentially methylated loci of the repetitive elements.

Venn diagram of the significant differentially methylated loci of the repetitive elements in ASD, ASD with 16p11.2 deletion (16p11.2 del), ASD with *CHD8* variants, and 16p11.2 del without ASD: all conditions were compared with non-ASD (a). Repartition of the unique loci of the significant differentially methylated loci of the repetitive elements by genomic feature in ASD with 16p11.2 del (b) and ASD with *CHD8* variants (c).

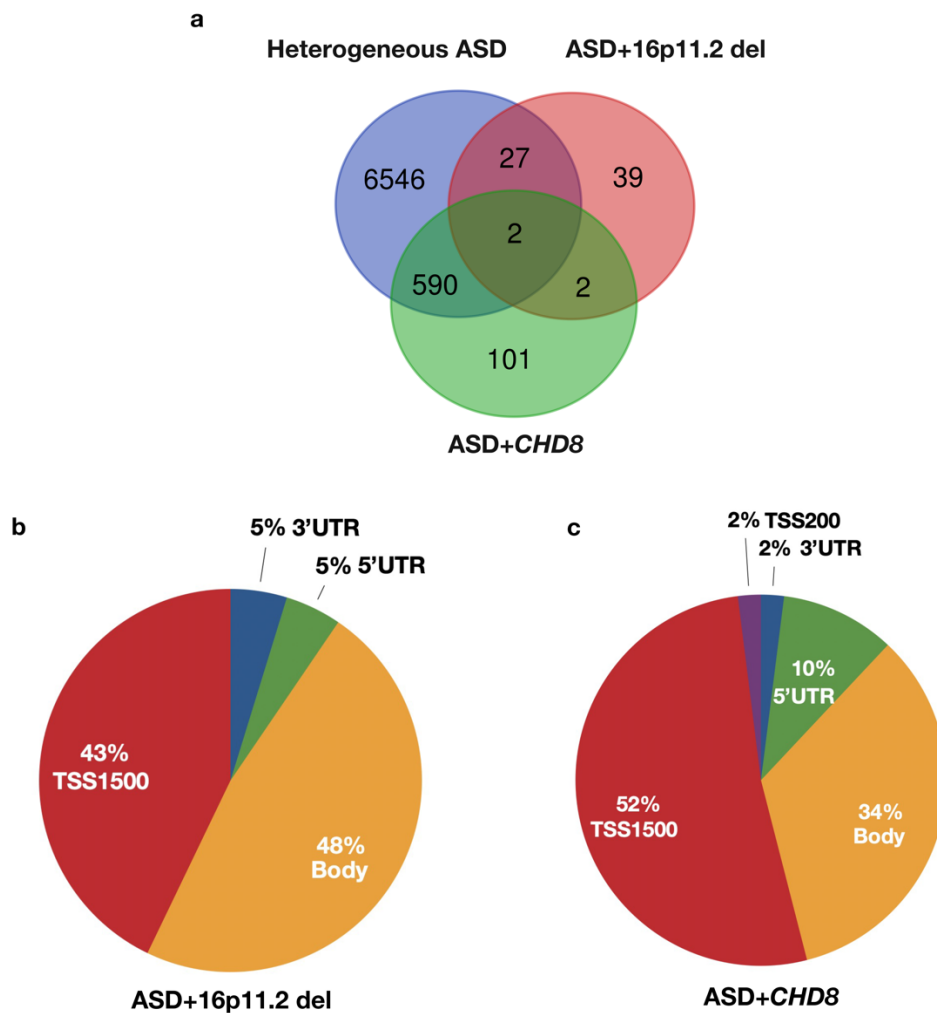

**Supplementary Fig. S5.** The regulatory network of differentially methylated genes (DMGs) in heterogeneous ASD that is related to neurological diseases. The gene regulatory network was predicted by ingenuity pathway analysis software using the list of DMGs (colored; red = hypermethylation; green = hypomethylation)

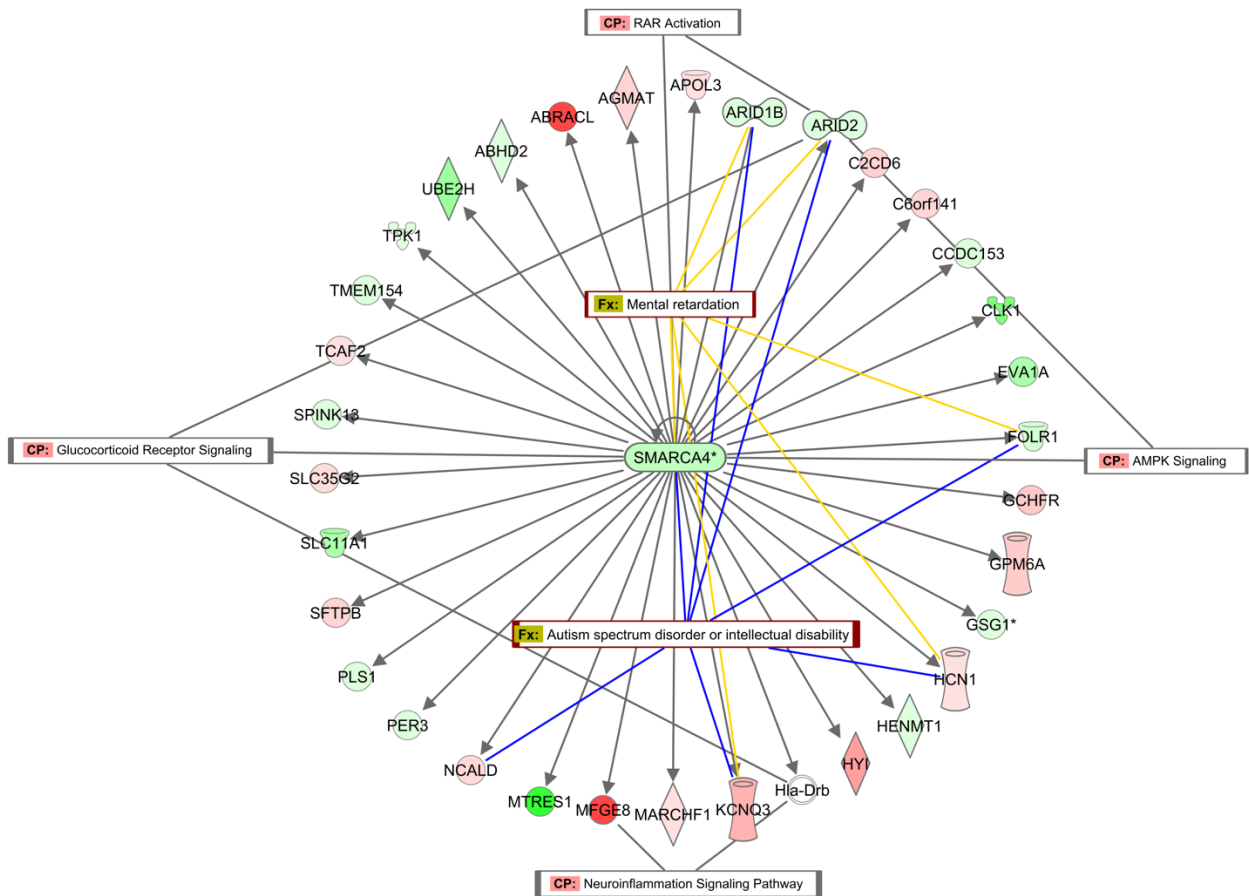

**Supplementary Fig. S6.** Gene regulatory network of DMGs related LINE-1 and *Alu* methylation

signatures. (a) Interactome of DMGs identified in ASD with 16p11.2del. (b)(c) Interactome of

DMGs identified in ASD with *CHD8* variants. (Colored; red = hypermethylation;

green = hypomethylation)

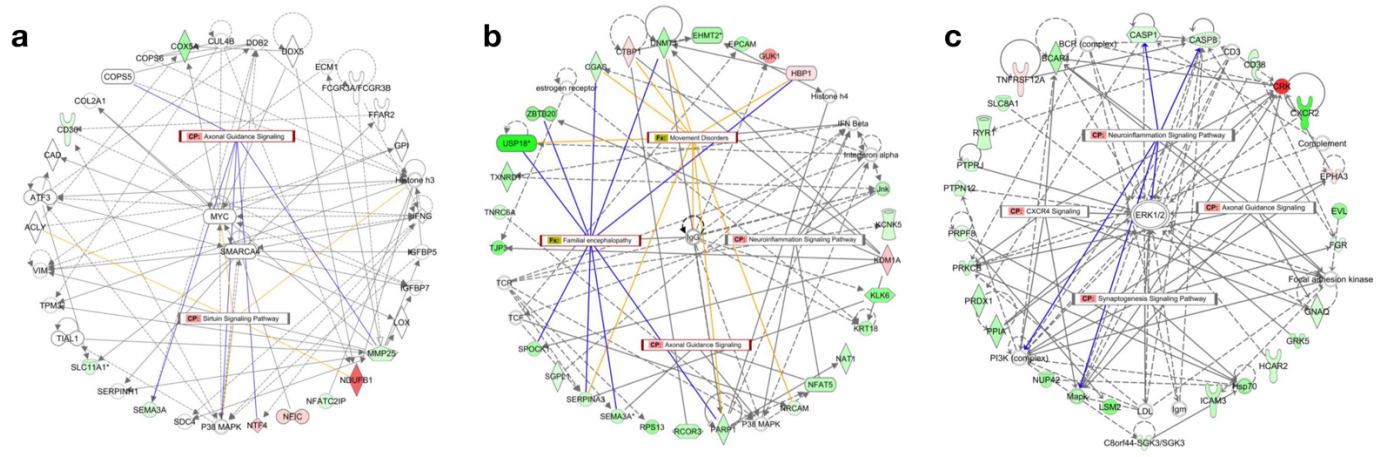



**Supplementary Fig. S7.** Genomic location of significant differentially methylated retrotransposons in heterogeneous ASD. Genomic location on *potassium voltage-gated channel subfamily Q member 3 (KCNQ3)* (a), *ubiquitin conjugating enzyme E2 H (UBE2H)* (b), and *hyperpolarization activated cyclic nucleotide gated potassium channel 1 (HCN1)* (c): blue line represents hypomethylation, red line represents hypermethylation.

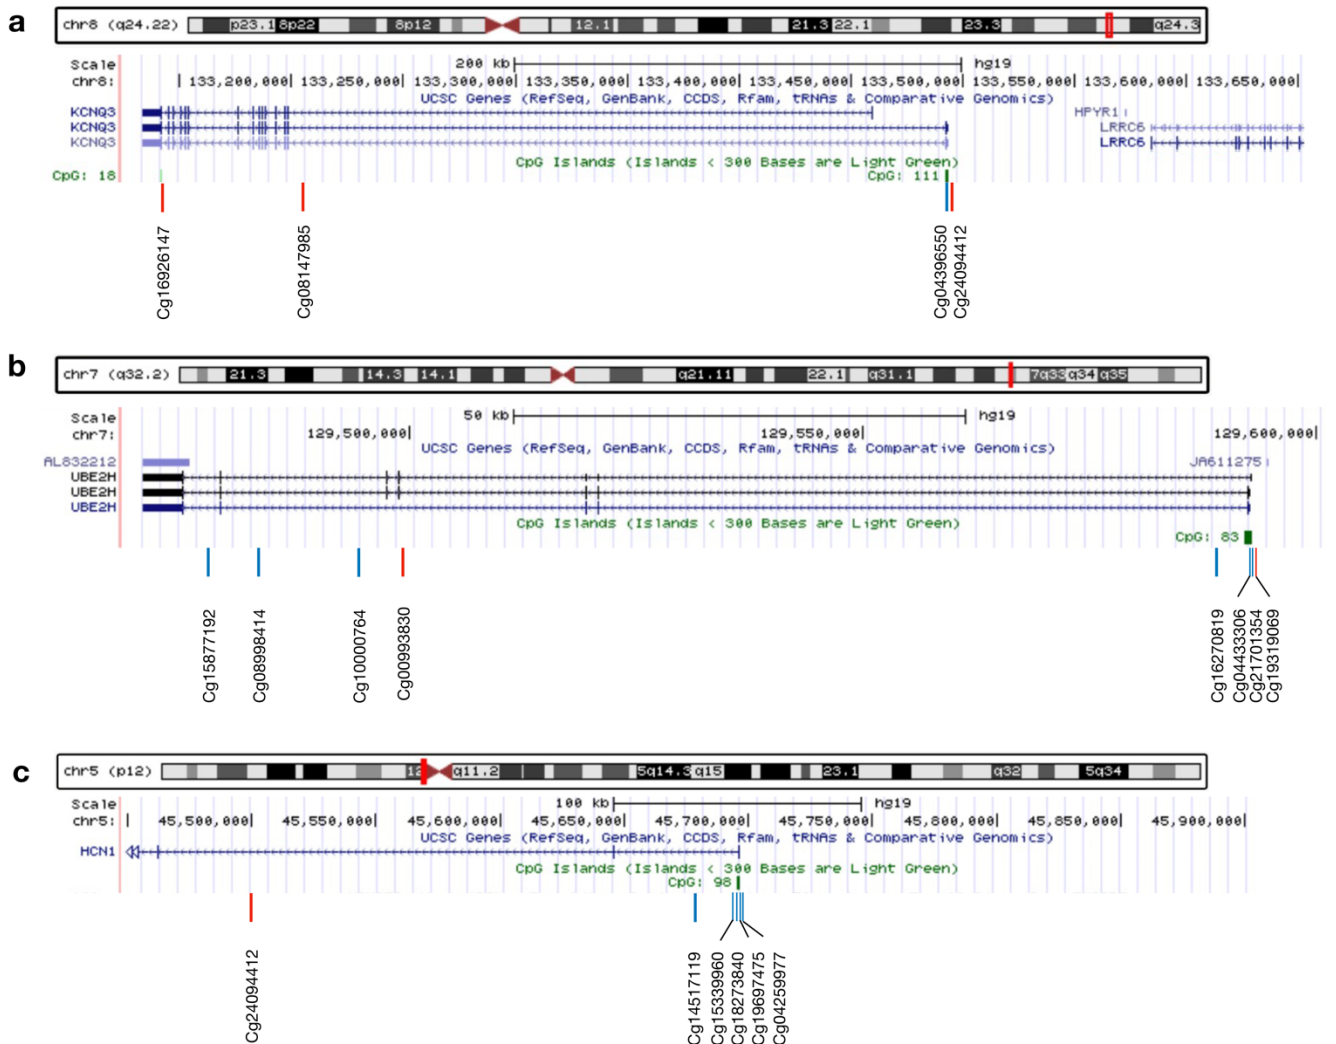

**Supplementary Fig. S8.** Intersection of LINE-1 and *Alu* methylation signatures between DMPs in the blood ASD and DMPs in the post-mortem brain tissues (validation cohort) including GSE80017 (prefrontal cortex) and GSE131706 (subventricular zone).

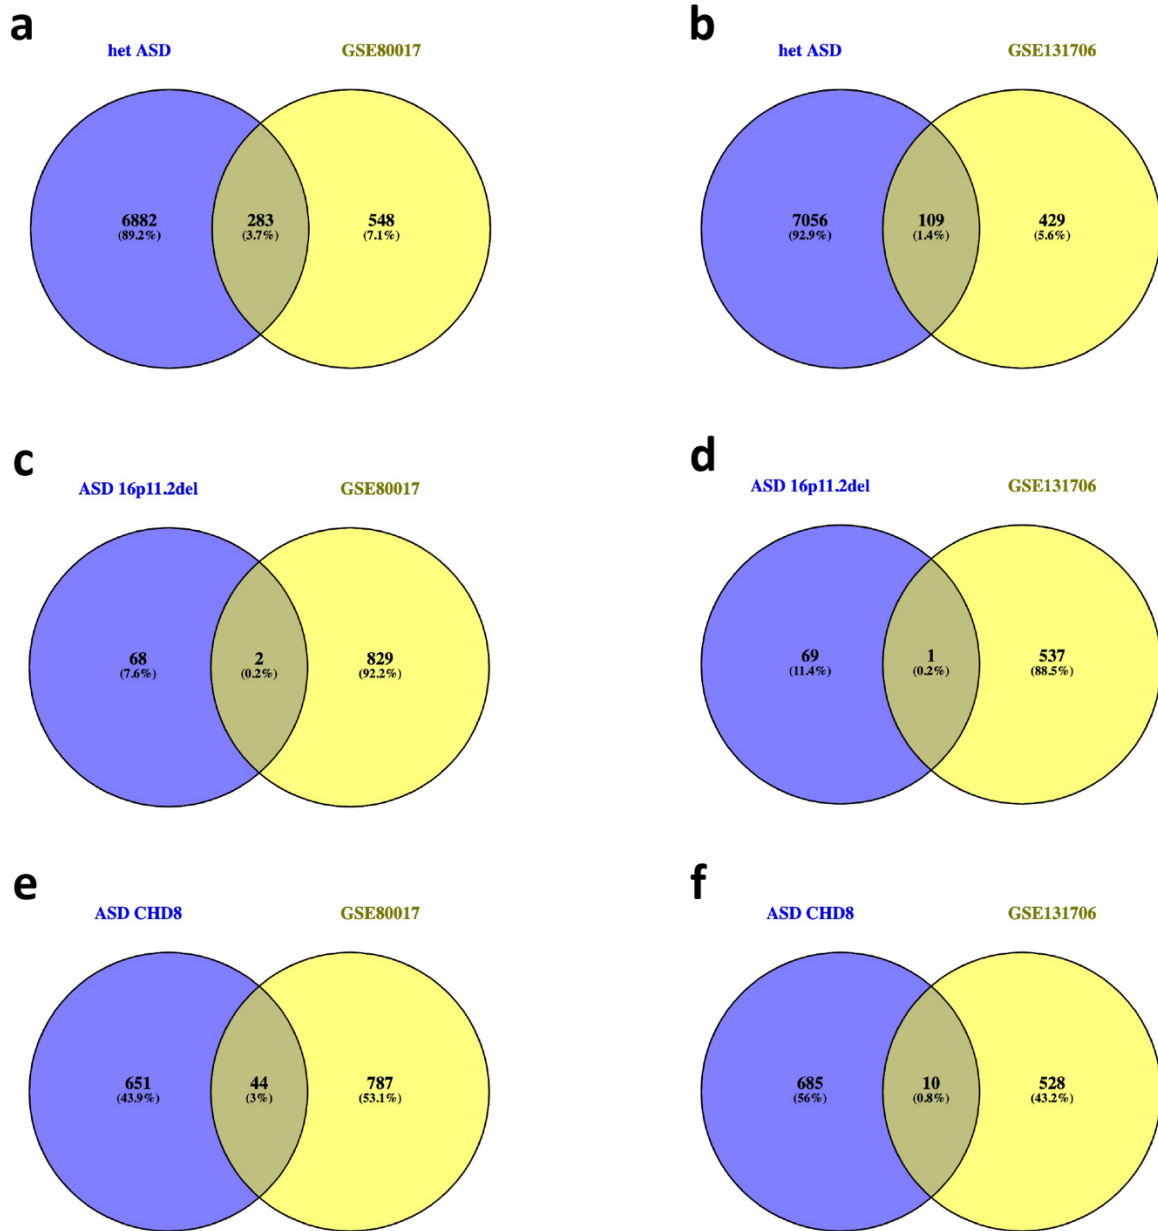

**Supplementary Table S1.** Diseases and biological functions associated with DMGs of LINE-1 and *Alu* methylation signatures in heterogeneous ASD predicted by the Ingenuity Pathway

Analysis (IPA)

| Name                                                | P-value             | #Genes |
|-----------------------------------------------------|---------------------|--------|
| Diseases and Disorders                              |                     |        |
| Cancer                                              | 5.01E-03 - 1.01E-65 | 3245   |
| Endocrine system disorders                          | 2.27E-03 - 4.39E-52 | 2818   |
| Gastrointestinal disease                            | 3.98E-03 - 1.36E-49 | 2912   |
| Reproductive system disease                         | 2.27E-03 - 8.05E-33 | 2236   |
| Neurological disease                                | 4.95E-03 - 3.33E-26 | 2274   |
| Neurological disease category                       |                     |        |
| Brain lesion                                        | 3.33E-26            | 1901   |
| Familial encephalopathy                             | 5.01E-10            | 471    |
| Cerebral disorder                                   | 2.24E-09            | 826    |
| Autism spectrum disorder or intellectual disability | 2.56E-06            | 253    |
| Huntington Disease                                  | 3.06E-06            | 159    |
| Ingenuity Canonical Pathways                        |                     |        |
| Protein Kinase A Signaling                          | 3.24E-05            | 92     |
| AMPK Signaling                                      | 1.00E-03            | 57     |
| ERK5 Signaling                                      | 1.32E-03            | 22     |
| NGF Signaling                                       | 2.19E-03            | 31     |
| $\alpha$ -Adrenergic Signaling                      | 2.69E-03            | 28     |

**Supplementary Table S2.** Diseases and biological functions associated with DMGs of LINE-1 and *Alu* methylation signatures in ASD with *CHD8* variant predicted by the Ingenuity Pathway Analysis (IPA)

| Name                                         | P-value             | #Genes |
|----------------------------------------------|---------------------|--------|
| Diseases and Disorders                       |                     |        |
| Cancer                                       | 2.64E-02 - 1.17E-07 | 429    |
| Immunological disease                        | 2.11E-02 - 2.32E-06 | 140    |
| Gastrointestinal disease                     | 2.47E-02 - 2.01E-05 | 390    |
| Reproductive system disease                  | 1.06E-02 - 2.55E-04 | 290    |
| Neurological disease                         | 2.58E-02 - 1.17E-04 | 302    |
| Neurological disease category                |                     |        |
| Brain lesion                                 | 2.18E-04            | 253    |
| Familial encephalopathy                      | 2.80E-04            | 73     |
| Neonatal epilepsy                            | 1.31E-03            | 2      |
| Huntington Disease                           | 5.20E-03            | 26     |
| Movement Disorders                           | 8.28E-03            | 42     |
| Ingenuity Canonical Pathways                 |                     |        |
| Pentose Phosphate Pathway (Oxidative Branch) | 2.57E-03            | 2      |
| Axonal Guidance Signaling                    | 3.89E-03            | 20     |
| NRF2-mediated Oxidative Stress Response      | 5.37E-03            | 11     |
| $\alpha$ -Adrenergic Signaling               | 6.46E-03            | 7      |
| CXCR4 Signaling                              | 8.13E-03            | 9      |

**Supplementary Table S3.** Diseases and biological functions associated with DMGs related LINE-1 and *Alu* methylation signatures in ASD with 16p11.2del variant predicted by the Ingenuity Pathway Analysis (IPA)

| Name                                                                     | P-value             | #Genes |
|--------------------------------------------------------------------------|---------------------|--------|
| Diseases and Disorders                                                   |                     |        |
| Hematological system development and function                            | 3.72E-02 - 2.63E-04 | 4      |
| Inflammatory response                                                    | 3.93E-02 - 2.63E-04 | 13     |
| Cancer                                                                   | 3.93E-02 - 9.29E-04 | 47     |
| Developmental disorder                                                   | 3.93E-02 - 2.22E-03 | 9      |
| Endocrine system disorders                                               | 3.93E-02 - 2.22E-03 | 38     |
| Neurological disease category                                            |                     |        |
| Primary ciliary dyskinesia type 39                                       | 2.22E-03            | 1      |
| Susceptibility to generalized epilepsy with febrile seizures plus type 5 | 2.22E-03            | 1      |
| Familial advanced sleep phase syndrome type 3                            | 2.22E-03            | 1      |
| Glutaric acidemia type 2A                                                | 2.22E-03            | 1      |
| Congenital fibrosis of extraocular muscles type 3A                       | 2.22E-03            | 1      |
| Ingenuity Canonical Pathways                                             |                     |        |
| Axonal Guidance Signaling                                                | 4.47E-03            | 5      |
| Semaphorin Signaling in Neurons                                          | 7.59E-03            | 2      |
| Gustation Pathway                                                        | 9.55E-03            | 3      |
| mTOR Signaling                                                           | 1.05E-02            | 3      |
| Sirtuin Signaling Pathway                                                | 2.51E-02            | 3      |

**Supplementary Table S4.** Details of the gene expression profiles obtained from GEO DataSets

| GSE number | Author            | Sample type                                        | Sample size          | Titles                                                                                                           | Notes                                    |
|------------|-------------------|----------------------------------------------------|----------------------|------------------------------------------------------------------------------------------------------------------|------------------------------------------|
| GSE59288   | Liu et al.        | Prefrontal cortex                                  | ASD=34,<br>Ctrl=38   | Disruption of an Evolutionarily Novel Synaptic Expression Pattern in Autism                                      | RNA-seq RAW data                         |
| GSE64018   | Parikshak et al.  | Prefrontal cortex and cerebellum                   | ASD=12,<br>Ctrl=12   | Genome-wide changes in lncRNA, splicing, and regional gene expression patterns in autism                         | Obtained DEGs list from original article |
| GSE28521   | Voineagu et al.   | Prefrontal cortex, Cerebellum, and Temporal cortex | ASD=10,<br>Ctrl=10   | Transcriptomic Analysis of Autism Brain Reveals Convergent Molecular Pathology                                   | Microarray data                          |
| GSE18123   | Kong SW et al.    | Whole blood                                        | ASD=170,<br>Ctrl=115 | Blood gene expression signatures distinguish autism spectrum disorders from controls                             | Microarray data                          |
| GSE25507   | Alter MD et al.   | Peripheral blood lymphocytes                       | ASD=82,<br>Ctrl=64   | Autism and increased paternal age-related changes in global levels of gene expression regulation                 | Microarray data                          |
| GSE42133   | Pramparo T et al. | Peripheral blood Leukocyte                         | ASD=91,<br>Ctrl=56   | Disrupted functional networks in autism underlie early brain mal-development and provide accurate classification | Microarray data                          |
| GSSE89594  | Kimura R et al.   | peripheral blood                                   | ASD=32,<br>Ctrl=54   | Integrative network analysis reveals biological pathways associated with Williams syndrome                       | Microarray data                          |

**Supplementary Table S5** Utilized gene expression microarrays/RNA-sequencing for the differential gene expression analysis of the target genes of heterogeneous ASD.

| Methylome data |           |        |          | Transcriptome data |                 |                 |        |         |
|----------------|-----------|--------|----------|--------------------|-----------------|-----------------|--------|---------|
| ProbeID        | Subfamily | Delta  | PFDR     | GSE                | Gene ID         | Gene            | log2FC | q-value |
| cg02571470     | L1MC5     | 0.061  | 1.61E-05 | GSE18123           | 1563708_at      | <i>SFXN5</i>    | -0.348 | 0.016   |
| cg02571470     | L1MC5     | 0.061  | 1.61E-05 | GSE18123           | 241999_at       | <i>SFXN5</i>    | -0.407 | 0.039   |
| cg21314304     | AluJb     | 0.054  | 2.68E-05 | GSE25507           | 226298_at       | <i>RUNDC1</i>   | -0.141 | 0.027   |
| cg21314304     | AluJb     | 0.054  | 2.68E-05 | GSE28521_FC        | ILMN_1733875    | <i>RUNDC1</i>   | -0.234 | 0.032   |
| cg21314304     | AluJb     | 0.054  | 2.68E-05 | GSE59288           | 146923          | <i>RUNDC1</i>   | -0.452 | <0.001  |
| cg04668642     | AluSx     | 0.051  | 2.68E-05 | GSE64018           | ENSG00000166780 | <i>C16orf45</i> | -0.224 | 0.042   |
| cg04668642     | AluSx     | 0.051  | 2.68E-05 | GSE28521_FC        | ILMN_1687821    | <i>C16orf45</i> | -0.256 | 0.029   |
| cg02616069     | AluJb     | 0.069  | 3.02E-05 | GSE18123           | 215584_at       | <i>HECW1</i>    | -0.259 | 0.007   |
| cg02616069     | AluJb     | 0.069  | 3.02E-05 | GSE59288           | 23072           | <i>HECW1</i>    | -0.805 | <0.001  |
| cg15531814     | AluJo     | 0.059  | 4.42E-05 | GSE89594           | A_23_P310257    | <i>KLK2</i>     | -0.161 | 0.018   |
| cg15531814     | AluJo     | 0.059  | 4.42E-05 | GSE18123           | 1555545_at      | <i>KLK2</i>     | -0.138 | 0.025   |
| cg11204311     | AluJr     | 0.060  | 4.54E-05 | GSE28521_FC        | ILMN_1679796    | <i>TOMM20</i>   | -0.506 | 0.011   |
| cg11204311     | AluJr     | 0.060  | 4.54E-05 | GSE59288           | 9804            | <i>TOMM20</i>   | -0.176 | 0.044   |
| cg11204311     | AluJr     | 0.060  | 4.54E-05 | GSE64018           | ENSG00000173726 | <i>TOMM20</i>   | -0.231 | 0.046   |
| cg04027778     | AluSc     | 0.054  | 4.66E-05 | GSE28521_TC        | ILMN_1712705    | <i>RAB40C</i>   | -0.258 | 0.031   |
| cg04027778     | AluSc     | 0.054  | 4.66E-05 | GSE18123           | 227269_s_at     | <i>RAB40C</i>   | -0.429 | 0.013   |
| cg04027778     | AluSc     | 0.054  | 4.66E-05 | GSE18123           | 1569396_at      | <i>RAB40C</i>   | -0.309 | 0.002   |
| cg04027778     | AluSc     | 0.054  | 4.66E-05 | GSE59288           | 57799           | <i>RAB40C</i>   | -0.322 | 0.013   |
| cg06719602     | AluSx1    | 0.050  | 5.57E-05 | GSE28521_FC        | ILMN_1706238    | <i>CSE1L</i>    | -0.202 | 0.038   |
| cg06719602     | AluSx1    | 0.050  | 5.57E-05 | GSE28521_FC        | ILMN_1665797    | <i>CSE1L</i>    | -0.184 | 0.045   |
| cg23935361     | AluJb     | 0.066  | 5.82E-05 | GSE42133           | ILMN_1738093    | <i>RNFT2</i>    | -0.102 | 0.009   |
| cg23935361     | AluJb     | 0.066  | 5.82E-05 | GSE59288           | 84900           | <i>RNFT2</i>    | -0.259 | 0.047   |
| cg17429234     | AluSp     | 0.061  | 6.88E-05 | GSE59288           | 1780            | <i>DYNCH1</i>   | -0.852 | <0.001  |
| cg17429234     | AluSp     | 0.061  | 6.88E-05 | GSE28521_FC        | ILMN_1690397    | <i>DYNCH1</i>   | -0.516 | 0.008   |
| cg17429234     | AluSp     | 0.061  | 6.88E-05 | GSE64018           | ENSG00000158560 | <i>DYNCH1</i>   | -0.324 | 0.041   |
| cg23376467     | AluSq     | 0.077  | 7.13E-05 | GSE18123           | 1556907_at      | <i>ZNF474</i>   | -0.292 | 0.035   |
| cg23376467     | AluSq     | 0.077  | 7.13E-05 | GSE89594           | A_33_P3360565   | <i>ZNF474</i>   | -0.205 | 0.020   |
| cg06471678     | AluYc     | -0.065 | 7.85E-05 | GSE25507           | 233694_at       | <i>HSPA1L</i>   | 0.111  | 0.031   |
| cg06471678     | AluYc     | -0.065 | 7.85E-05 | GSE42133           | ILMN_1654566    | <i>HSPA1L</i>   | 0.107  | 0.030   |
| cg15074424     | AluSx1    | 0.083  | 1.01E-04 | GSE28521_FC        | ILMN_2212354    | <i>WDR46</i>    | -0.201 | 0.036   |
| cg15074424     | AluSx1    | 0.083  | 1.01E-04 | GSE28521_TC        | ILMN_2212354    | <i>WDR46</i>    | -0.303 | 0.033   |
| cg02747612     | AluSq     | -0.068 | 1.02E-04 | GSE42133           | ILMN_1802053    | <i>ZNF91</i>    | 0.162  | 0.016   |
| cg02747612     | AluSq     | -0.068 | 1.02E-04 | GSE18123           | 236128_at       | <i>ZNF91</i>    | 0.306  | 0.047   |
| cg13916261     | AluSg     | -0.100 | 1.05E-04 | GSE59288           | 23048           | <i>FNBP1</i>    | 0.354  | 0.013   |
| cg13916261     | AluSg     | -0.100 | 1.05E-04 | GSE42133           | ILMN_1797342    | <i>FNBP1</i>    | 0.156  | <0.001  |

|            |        |        |          |             |                 |                  |        |        |
|------------|--------|--------|----------|-------------|-----------------|------------------|--------|--------|
| cg02827046 | L1PA16 | 0.099  | 1.17E-04 | GSE89594    | A_33_P3420900   | <i>PATE2</i>     | -0.221 | 0.014  |
| cg02827046 | L1PA16 | 0.099  | 1.17E-04 | GSE42133    | ILMN_2133784    | <i>PATE2</i>     | -0.157 | 0.024  |
| cg07930329 | AluSx3 | 0.056  | 1.21E-04 | GSE59288    | 10055           | <i>SAE1</i>      | -0.295 | 0.006  |
| cg07930329 | AluSx3 | 0.056  | 1.21E-04 | GSE28521_TC | ILMN_1657204    | <i>SAE1</i>      | -0.194 | 0.042  |
| cg07930329 | AluSx3 | 0.056  | 1.21E-04 | GSE64018    | ENSG00000142230 | <i>SAE1</i>      | -0.194 | 0.039  |
| cg16926147 | AluSg7 | 0.062  | 1.31E-04 | GSE18123    | 206573_at       | <i>KCNQ3</i>     | -0.093 | 0.018  |
| cg16926147 | AluSg7 | 0.062  | 1.31E-04 | GSE59288    | 3786            | <i>KCNQ3</i>     | -0.634 | <0.001 |
| cg08499057 | AluJo  | 0.057  | 1.63E-04 | GSE28521_FC | ILMN_1781999    | <i>ABCF2</i>     | -0.164 | 0.043  |
| cg08499057 | AluJo  | 0.057  | 1.63E-04 | GSE28521_FC | ILMN_1669201    | <i>ABCF2</i>     | -0.168 | 0.043  |
| cg08499057 | AluJo  | 0.057  | 1.63E-04 | GSE28521_TC | ILMN_1669201    | <i>ABCF2</i>     | -0.202 | 0.037  |
| cg08499057 | AluJo  | 0.057  | 1.63E-04 | GSE18123    | 207623_at       | <i>ABCF2</i>     | -0.321 | 0.005  |
| cg08998414 | AluY   | -0.106 | 1.85E-04 | GSE64018    | ENSG00000186591 | <i>UBE2H</i>     | 0.130  | 0.035  |
| cg08998414 | AluY   | -0.106 | 1.85E-04 | GSE42133    | ILMN_1757644    | <i>UBE2H</i>     | 0.126  | 0.026  |
| cg08998414 | AluY   | -0.106 | 1.85E-04 | GSE25507    | 222419_x_at     | <i>UBE2H</i>     | 0.171  | 0.023  |
| cg20334591 | AluSx  | 0.055  | 1.85E-04 | GSE42133    | ILMN_2174702    | <i>UBE2K</i>     | -0.118 | 0.002  |
| cg01996643 | AluJr4 | 0.089  | 2.12E-04 | GSE59288    | 3831            | <i>KLC1</i>      | -0.432 | <0.001 |
| cg01996643 | AluJr4 | 0.089  | 2.12E-04 | GSE42133    | ILMN_1726901    | <i>KLC1</i>      | -0.089 | 0.034  |
| cg23480284 | AluJb  | 0.087  | 2.23E-04 | GSE59288    | 8193            | <i>DPF1</i>      | -0.583 | 0.001  |
| cg23480284 | AluJb  | 0.087  | 2.23E-04 | GSE18123    | 231599_x_at     | <i>DPF1</i>      | -0.228 | 0.029  |
| cg23416909 | L1M5   | -0.104 | 3.44E-04 | GSE18123    | 206405_x_at     | <i>USP6</i>      | 0.233  | <0.001 |
| cg23416909 | L1M5   | -0.104 | 3.44E-04 | GSE59288    | 9098            | <i>USP6</i>      | 0.614  | <0.001 |
| cg23043218 | AluJb  | 0.057  | 3.50E-04 | GSE59288    | 84224           | <i>NBPF3</i>     | -0.521 | 0.004  |
| cg23043218 | AluJb  | 0.057  | 3.50E-04 | GSE18123    | 1558825_s_at    | <i>NBPF3</i>     | -0.287 | 0.026  |
| cg01779076 | AluSg  | -0.054 | 3.50E-04 | GSE18123    | 209939_x_at     | <i>CFLAR</i>     | 0.099  | 0.012  |
| cg01779076 | AluSg  | -0.054 | 3.50E-04 | GSE18123    | 211316_x_at     | <i>CFLAR</i>     | 0.074  | 0.047  |
| cg01779076 | AluSg  | -0.054 | 3.50E-04 | GSE59288    | 8837            | <i>CFLAR</i>     | 0.425  | 0.008  |
| cg19453726 | AluJr  | 0.068  | 4.36E-04 | GSE18123    | 1558756_at      | <i>C2CD3</i>     | -0.516 | 0.029  |
| cg19453726 | AluJr  | 0.068  | 4.36E-04 | GSE18123    | 231708_at       | <i>C2CD3</i>     | -0.379 | 0.018  |
| cg07127103 | AluSc  | 0.071  | 6.66E-04 | GSE18123    | 212497_at       | <i>MAPK1IP1L</i> | -0.233 | 0.021  |
| cg07127103 | AluSc  | 0.071  | 6.66E-04 | GSE25507    | 225643_at       | <i>MAPK1IP1L</i> | -0.154 | 0.036  |
| cg26447146 | AluSx  | 0.077  | 8.52E-04 | GSE59288    | 54993           | <i>ZSCAN2</i>    | -0.354 | 0.005  |
| cg26447146 | AluSx  | 0.077  | 8.52E-04 | GSE18123    | 231188_at       | <i>ZSCAN2</i>    | -0.165 | 0.023  |
| cg02767673 | L1MEc  | -0.077 | 1.10E-03 | GSE59288    | 79745           | <i>CLIP4</i>     | 0.351  | 0.009  |
| cg02767673 | L1MEc  | -0.077 | 1.10E-03 | GSE18123    | 226425_at       | <i>CLIP4</i>     | 0.246  | 0.002  |
| cg02848097 | L1MC1  | -0.091 | 1.16E-03 | GSE59288    | 4126            | <i>MANBA</i>     | 0.261  | 0.024  |
| cg02848097 | L1MC1  | -0.091 | 1.16E-03 | GSE18123    | 203778_at       | <i>MANBA</i>     | 0.222  | 0.002  |
| cg01783051 | L1PA10 | 0.053  | 1.96E-03 | GSE18123    | 214170_x_at     | <i>FH</i>        | -0.070 | 0.039  |
| cg01783051 | L1PA10 | 0.053  | 1.96E-03 | GSE28521_FC | ILMN_1719392    | <i>FH</i>        | -0.256 | <0.001 |
| cg01783051 | L1PA10 | 0.053  | 1.96E-03 | GSE28521_TC | ILMN_1719392    | <i>FH</i>        | -0.182 | 0.035  |
| cg23691873 | AluJr4 | 0.059  | 2.39E-03 | GSE18123    | 206010_at       | <i>HABP2</i>     | -0.295 | 0.024  |
| cg23691873 | AluJr4 | 0.059  | 2.39E-03 | GSE89594    | A_23_P1173      | <i>HABP2</i>     | -0.180 | <0.001 |



|            |        |        |          |             |                 |                |        |        |
|------------|--------|--------|----------|-------------|-----------------|----------------|--------|--------|
| cg12611243 | L1MC1  | 0.051  | 2.43E-03 | GSE59288    | 3340            | <i>NDST1</i>   | -0.231 | 0.050  |
| cg12611243 | L1MC1  | 0.051  | 2.43E-03 | GSE18123    | 1554010_at      | <i>NDST1</i>   | -0.209 | 0.021  |
| cg12611243 | L1MC1  | 0.051  | 2.43E-03 | GSE18123    | 202608_s_at     | <i>NDST1</i>   | -0.275 | 0.029  |
| cg00528779 | L1MD3  | -0.062 | 2.77E-03 | GSE42133    | ILMN_2340052    | <i>NCOR2</i>   | 0.151  | 0.022  |
| cg00528779 | L1MD3  | -0.062 | 2.77E-03 | GSE42133    | ILMN_1698419    | <i>NCOR2</i>   | 0.133  | 0.025  |
| cg20889774 | L1PA10 | 0.068  | 3.07E-03 | GSE18123    | 228737_at       | <i>TOX2</i>    | -0.282 | 0.027  |
| cg20889774 | L1PA10 | 0.068  | 3.07E-03 | GSE59288    | 84969           | <i>TOX2</i>    | -0.324 | 0.018  |
| cg21240283 | L1MB5  | 0.074  | 4.93E-03 | GSE28521_FC | ILMN_1777261    | <i>FAM3C</i>   | -0.453 | 0.037  |
| cg21240283 | L1MB5  | 0.074  | 4.93E-03 | GSE59288    | 10447           | <i>FAM3C</i>   | -0.222 | 0.039  |
| cg21240283 | L1MB5  | 0.074  | 4.93E-03 | GSE28521_FC | ILMN_2368773    | <i>FAM3C</i>   | -0.421 | 0.043  |
| cg18599231 | L1MA6  | 0.063  | 6.32E-03 | GSE18123    | 1554984_a_at    | <i>HLA-DOB</i> | -0.433 | 0.018  |
| cg18599231 | L1MA6  | 0.063  | 6.32E-03 | GSE18123    | 205671_s_at     | <i>HLA-DOB</i> | -0.212 | 0.013  |
| cg13089369 | L1PB1  | 0.057  | 9.66E-03 | GSE28521_FC | ILMN_2340131    | <i>MAPK10</i>  | -0.409 | 0.009  |
| cg13089369 | L1PB1  | 0.057  | 9.66E-03 | GSE28521_FC | ILMN_1748281    | <i>MAPK10</i>  | -0.347 | 0.006  |
| cg12181730 | AluSz  | -0.058 | 2.38E-02 | GSE18123    | 221645_s_at     | <i>ZNF83</i>   | 0.345  | <0.001 |
| cg12181730 | AluSz  | -0.058 | 2.38E-02 | GSE59288    | 55769           | <i>ZNF83</i>   | 0.496  | 0.037  |
| cg25547286 | AluSz  | 0.062  | 2.82E-02 | GSE59288    | 10426           | <i>TUBGCP3</i> | -0.363 | 0.008  |
| cg25547286 | AluSz  | 0.062  | 2.82E-02 | GSE18123    | 1554086_at      | <i>TUBGCP3</i> | -0.140 | 0.021  |
| cg01324264 | AluSz  | 0.056  | 3.11E-02 | GSE18123    | 202942_at       | <i>ETFB</i>    | -0.139 | 0.026  |
| cg01324264 | AluSz  | 0.056  | 3.11E-02 | GSE42133    | ILMN_1729374    | <i>ETFB</i>    | -0.141 | <0.001 |
| cg00507855 | AluY   | -0.059 | 4.19E-02 | GSE28521_FC | ILMN_2322996    | <i>EYA2</i>    | 0.464  | 0.026  |
| cg00507855 | AluY   | -0.059 | 4.19E-02 | GSE59288    | 2139            | <i>EYA2</i>    | 0.538  | 0.024  |
| cg00507855 | AluY   | -0.059 | 4.19E-02 | GSE64018    | ENSG00000064655 | <i>EYA2</i>    | 0.535  | 0.013  |

**Supplementary Table S6** List of overlapping and non-overlapping DMPs among heterogeneous ASD, ASD+16p11.2 del and ASD+*CDH8* variants.

| Intersections                                                                                                               | No. of overlapping DMPs | List of overlapping DMPs                                                                                                                                                                                                                                                                                                                                                                                                                                                                                                                                                                                                                                                                                                                                                                                                                                                                                                                                                                                                                                                                                                                                                                                                                                                                                                                                                                                                                                                                                                                                                                                                                                                                                                                                                                                                                                                                                                                                                                                                                                                                                                       |
|-----------------------------------------------------------------------------------------------------------------------------|-------------------------|--------------------------------------------------------------------------------------------------------------------------------------------------------------------------------------------------------------------------------------------------------------------------------------------------------------------------------------------------------------------------------------------------------------------------------------------------------------------------------------------------------------------------------------------------------------------------------------------------------------------------------------------------------------------------------------------------------------------------------------------------------------------------------------------------------------------------------------------------------------------------------------------------------------------------------------------------------------------------------------------------------------------------------------------------------------------------------------------------------------------------------------------------------------------------------------------------------------------------------------------------------------------------------------------------------------------------------------------------------------------------------------------------------------------------------------------------------------------------------------------------------------------------------------------------------------------------------------------------------------------------------------------------------------------------------------------------------------------------------------------------------------------------------------------------------------------------------------------------------------------------------------------------------------------------------------------------------------------------------------------------------------------------------------------------------------------------------------------------------------------------------|
| <ul style="list-style-type: none"> <li>- ASD+16p11.2 del</li> <li>- ASD+<i>CHD8</i></li> <li>- Heterogeneous ASD</li> </ul> | 2                       | cg27005715,cg08394597                                                                                                                                                                                                                                                                                                                                                                                                                                                                                                                                                                                                                                                                                                                                                                                                                                                                                                                                                                                                                                                                                                                                                                                                                                                                                                                                                                                                                                                                                                                                                                                                                                                                                                                                                                                                                                                                                                                                                                                                                                                                                                          |
| <ul style="list-style-type: none"> <li>- ASD+16p11.2 del</li> <li>- Heterogeneous ASD</li> </ul>                            | 27                      | cg13979194,cg07290865,cg21555940,cg07818063,cg25095351,cg18391611,cg22847190,cg25757017,cg01649538,cg06488671,cg00694180,cg13802355,cg05654059,cg26577993,cg17142091,cg02920701,cg13834366,cg13916261,cg17051552,cg25188165,cg26425691,cg15577272,cg25937395,cg14631503,cg24330514,cg10988561,cg22289694                                                                                                                                                                                                                                                                                                                                                                                                                                                                                                                                                                                                                                                                                                                                                                                                                                                                                                                                                                                                                                                                                                                                                                                                                                                                                                                                                                                                                                                                                                                                                                                                                                                                                                                                                                                                                       |
| <ul style="list-style-type: none"> <li>- ASD+<i>CHD8</i></li> <li>- Heterogeneous ASD</li> </ul>                            | 590                     | cg12393411,cg00549972,cg17422409,cg23698897,cg16512795,cg05759316,cg21757392,cg20616645,cg27393573,cg14528040,cg20105448,cg17522935,cg18390494,cg08553963,cg17882033,cg19392007,cg09388237,cg05900045,cg19651268,cg18330222,cg05019180,cg21969548,cg10739132,cg21599794,cg16061177,cg14200357,cg11811959,cg08199727,cg05680926,cg02094225,cg09838962,cg24494791,cg06901762,cg14089007,cg02440947,cg09790117,cg26873488,cg13614586,cg08857906,cg18570369,cg06082293,cg12020954,cg15975375,cg25399504,cg01085853,cg21448781,cg01000036,cg07971743,cg17182002,cg23221506,cg26095478,cg05062491,cg04876223,cg25491112,cg21387117,cg19593229,cg18058157,cg19764326,cg22447396,cg23363818,cg13637352,cg03991533,cg14799489,cg26131493,cg21673929,cg08157318,cg21870518,cg20334591,cg22226852,cg20960611,cg25188141,cg01336552,cg24193797,cg25188442,cg06776823,cg02711159,cg27399297,cg15269721,cg22062131,cg04548722,cg25814432,cg16644647,cg21557451,cg24787692,cg11234875,cg09357831,cg08222555,cg06450790,cg14311225,cg15944824,cg10690082,cg23683290,cg04505313,cg08702612,cg10866856,cg10008284,cg07587783,cg04588248,cg07324609,cg26154546,cg20485361,cg16960797,cg27215140,cg03355241,cg08472753,cg26972937,cg06830415,cg11162942,cg13947513,cg19497646,cg26917965,cg00956639,cg16470963,cg07169295,cg13977583,cg12224879,cg14715098,cg12974668,cg06760144,cg09569990,cg01573175,cg02871554,cg03655147,cg25719374,cg04326562,cg16568759,cg05118364,cg06659269,cg19248797,cg10526795,cg27337803,cg23857447,cg26542912,cg07725198,cg05761535,cg13971096,cg16470306,cg11228874,cg09814912,cg21570277,cg09146645,cg01650965,cg24800365,cg04509365,cg11694026,cg01334783,cg11336323,cg02288770,cg09028316,cg11509284,cg12545097,cg10178127,cg05049638,cg21930286,cg18148726,cg06398741,cg03377789,cg19991512,cg16632575,cg02314619,cg02523938,cg19674688,cg24531568,cg23531154,cg24353651,cg10372473,cg12193153,cg19526740,cg22654601,cg05769097,cg20364241,cg13751692,cg12643877,cg24889095,cg09521141,cg00116558,cg23029185,cg01018606,cg23499616,cg10516204,cg01167408,cg12844298,cg26262710,cg20777740,cg14773480,cg21314304, |

| Intersections | No. of overlapping DMPs | List of overlapping DMPs                                                                                                                                                                                                                                                                                                                                                                                                                                                                                                                                                                                                                                                                                                                                                                                                                                                                                                                                                                                                                                                                                                                                                                                                                                                                                                                                                                                                                                                                                                                                                                                                                                                                                                                                                                                                                                                                                                                                                                                                                                                                                                                                                                                                                                                                                                                                                                                                                                                                                                                                                                                                                                                                                                                                                                                                                                                                                                                                                                                                                                                                                                                                                                             |
|---------------|-------------------------|------------------------------------------------------------------------------------------------------------------------------------------------------------------------------------------------------------------------------------------------------------------------------------------------------------------------------------------------------------------------------------------------------------------------------------------------------------------------------------------------------------------------------------------------------------------------------------------------------------------------------------------------------------------------------------------------------------------------------------------------------------------------------------------------------------------------------------------------------------------------------------------------------------------------------------------------------------------------------------------------------------------------------------------------------------------------------------------------------------------------------------------------------------------------------------------------------------------------------------------------------------------------------------------------------------------------------------------------------------------------------------------------------------------------------------------------------------------------------------------------------------------------------------------------------------------------------------------------------------------------------------------------------------------------------------------------------------------------------------------------------------------------------------------------------------------------------------------------------------------------------------------------------------------------------------------------------------------------------------------------------------------------------------------------------------------------------------------------------------------------------------------------------------------------------------------------------------------------------------------------------------------------------------------------------------------------------------------------------------------------------------------------------------------------------------------------------------------------------------------------------------------------------------------------------------------------------------------------------------------------------------------------------------------------------------------------------------------------------------------------------------------------------------------------------------------------------------------------------------------------------------------------------------------------------------------------------------------------------------------------------------------------------------------------------------------------------------------------------------------------------------------------------------------------------------------------------|
|               |                         | cg09834444,cg00911267,cg09456760,cg17972930,cg07357075,cg09856869,<br>cg16415939,cg01809080,cg11423443,cg08505649,cg09267580,cg17454086,<br>cg08705895,cg20026205,cg16463100,cg22155325,cg08151866,cg11800888,<br>cg19197082,cg06686174,cg11191744,cg00995085,cg01944530,cg19615949,<br>cg26256420,cg03033780,cg27519910,cg23380262,cg19761271,cg03374552,<br>cg01435137,cg02489379,cg21262907,cg14265180,cg25477904,cg19485271,<br>cg03144715,cg04908013,cg23231093,cg01575164,cg12056677,cg26195168,<br>cg15472282,cg01540760,cg12878615,cg13453288,cg11874143,cg11660569,<br>cg11134322,cg05201677,cg15603614,cg20710898,cg14336803,cg19477926,<br>cg17812839,cg09827122,cg02968496,cg04728180,cg19045284,cg14115771,<br>cg14153625,cg22927957,cg06471678,cg18738114,cg18675361,cg02173333,<br>cg12119068,cg08865588,cg26442078,cg16205163,cg26180732,cg17097119,<br>cg06061692,cg08953850,cg00677180,cg13182809,cg09657136,cg03663072,<br>cg24620463,cg17120654,cg06610614,cg18022357,cg26238180,cg25621735,<br>cg21919903,cg17630248,cg25002551,cg08740309,cg22252462,cg02599116,<br>cg04275172,cg01324264,cg10819992,cg19918821,cg04140754,cg12794109,<br>cg03791799,cg18730307,cg15480485,cg25283205,cg18951256,cg24104623,<br>cg16926147,cg02989230,cg09112388,cg11758022,cg13619349,cg02647989,<br>cg21267836,cg12566149,cg14835746,cg00467160,cg09582822,cg27222589,<br>cg27378066,cg01548340,cg03658699,cg27360593,cg13587495,cg07507749,<br>cg27194173,cg24747539,cg01076454,cg16194684,cg05306903,cg00551654,<br>cg00572487,cg01659483,cg18637291,cg07689148,cg23743606,cg18402433,<br>cg26192872,cg14430410,cg12330727,cg09477426,cg14579098,cg07913503,<br>cg10437577,cg00591353,cg12525774,cg02695751,cg12151542,cg15695952,<br>cg01035563,cg25819914,cg27046528,cg05457768,cg15067764,cg22565361,<br>cg15495901,cg01608315,cg14959695,cg13594837,cg18828762,cg02653315,<br>cg15979146,cg11029642,cg06757863,cg07930329,cg01330679,cg05977558,<br>cg22160349,cg23817555,cg16806519,cg08163160,cg03996098,cg21543123,<br>cg00366594,cg18592742,cg06881432,cg12518775,cg24087515,cg18458116,<br>cg18231321,cg25513108,cg12765138,cg19240584,cg09604414,cg13202415,<br>cg11973587,cg00733705,cg25817973,cg01700035,cg07992633,cg13467964,<br>cg26965832,cg17210130,cg13085681,cg22608269,cg26612648,cg06864005,<br>cg02868598,cg00279778,cg08698856,cg10850863,cg21221785,cg09593727,<br>cg23707912,cg09126701,cg20971459,cg08816455,cg00858196,cg08655480,<br>cg15435907,cg00991546,cg27639249,cg21533964,cg02827046,cg11845486,<br>cg04371950,cg08384658,cg06570311,cg09120302,cg16944496,cg02581828,<br>cg14734614,cg02148292,cg09927198,cg03322872,cg07437988,cg14775487,<br>cg08164977,cg25916505,cg02600258,cg14773441,cg01165426,cg06373096,<br>cg21180845,cg07106501,cg27375966,cg13766651,cg16348962,cg05348421,<br>cg11178371,cg12282124,cg06528310,cg08068007,cg14218089,cg11827409,<br>cg04460361,cg03407622,cg04188562,cg02211160,cg12467123,cg06749259,<br>cg04671206,cg25845688,cg13111263,cg14952802,cg19470840,cg24053148,<br>cg22041446,cg23300865,cg26415023,cg19950846,cg06786000,cg04293489,<br>cg19190258,cg06485596,cg06723057,cg08064261,cg03349173,cg16732626, |

| Intersections                                                                           | No. of overlapping DMPs | List of overlapping DMPs                                                                                                                                                                                                                                                                                                                                                                                                                                                                                                                                                                                                                                                                                                                                                                                                                                                                                                                                                                                                                                                                                                                                                                                                                                                                                                                                                                                                                                                                                                                                                                                                                                                                        |
|-----------------------------------------------------------------------------------------|-------------------------|-------------------------------------------------------------------------------------------------------------------------------------------------------------------------------------------------------------------------------------------------------------------------------------------------------------------------------------------------------------------------------------------------------------------------------------------------------------------------------------------------------------------------------------------------------------------------------------------------------------------------------------------------------------------------------------------------------------------------------------------------------------------------------------------------------------------------------------------------------------------------------------------------------------------------------------------------------------------------------------------------------------------------------------------------------------------------------------------------------------------------------------------------------------------------------------------------------------------------------------------------------------------------------------------------------------------------------------------------------------------------------------------------------------------------------------------------------------------------------------------------------------------------------------------------------------------------------------------------------------------------------------------------------------------------------------------------|
|                                                                                         |                         | cg03043928,cg16377144,cg26780231,cg14714057,cg19605592,cg24912310,<br>cg12911313,cg15608151,cg09249637,cg03672621,cg13227480,cg17888979,<br>cg17284568,cg16359517,cg04410039,cg22499348,cg07690202,cg19755108,<br>cg11661134,cg13844662,cg18331325,cg12447346,cg03728499,cg17035513,<br>cg18311854,cg23499977,cg25421423,cg04116790,cg07521902,cg26909817,<br>cg21301655,cg16288378,cg06321336,cg04249613,cg13942897,cg02761778,<br>cg10894274,cg04276288,cg22933538,cg18660980,cg02023042,cg11047457,<br>cg19789336,cg22753417,cg20126417,cg18070057,cg14933365,cg14002274,<br>cg04576182,cg23376467,cg25169926,cg08509032,cg04784196,cg18117601,<br>cg05388057,cg03331175,cg10987882,cg09581201,cg07779179,cg21829420,<br>cg03584683,cg18738545,cg16241861,cg06123940,cg19853333,cg21577193,<br>cg04611407,cg02911408,cg11826452,cg12121634,cg16399360,cg13788717,<br>cg02126497,cg18831773,cg06196636,cg14963062,cg03965414,cg17489282,<br>cg25731347,cg18253026,cg07596467,cg14785220,cg11204311,cg14554776,<br>cg25523522,cg18813867,cg08023476,cg05567726,cg07680195,cg22458640,<br>cg13796246,cg15439326,cg17762631,cg03410097,cg06033407,cg07816200,<br>cg02448190,cg25626264,cg13390231,cg06949017,cg16655175,cg06187986,<br>cg10515439,cg00013543,cg23656485,cg27433934,cg21251646,cg04668642,<br>cg04466394,cg04382250,cg01390564,cg02442496,cg18874953,cg11437226,<br>cg00261099,cg11107524,cg26453517,cg21950196,cg13681325,cg15400593,<br>cg20024310,cg26558363,cg13880034,cg00990358,cg08867767,cg26675410,<br>cg25045882,cg04082898,cg02018121,cg04477079,cg24027342,cg17391569,<br>cg14027685,cg12934569,cg03330642,cg15633618,cg09427809,cg21395626,<br>cg20594433,cg15074424 |
| <ul style="list-style-type: none"> <li>- ASD+16p11.2 del</li> <li>- ASD+CHD8</li> </ul> | 2                       | cg26962295,cg26620682                                                                                                                                                                                                                                                                                                                                                                                                                                                                                                                                                                                                                                                                                                                                                                                                                                                                                                                                                                                                                                                                                                                                                                                                                                                                                                                                                                                                                                                                                                                                                                                                                                                                           |
| <ul style="list-style-type: none"> <li>- Heterogeneous ASD</li> </ul>                   | 6546                    | cg23027296,cg01908444,cg05956803,cg23502492,cg04922006,cg14757759,<br>cg20889774,cg04510049,cg11857452,cg19917720,cg12738399,cg02166431,<br>cg02605178,cg14154441,cg13324357,cg02155543,cg04626931,cg10699852,<br>cg05187583,cg24180227,cg11668188,cg20162066,cg21160516,cg15627442,<br>cg26114804,cg21574739,cg10600242,cg21158795,cg03603924,cg25739309,<br>cg09713269,cg23861101,cg27167195,cg03554660,cg05119467,cg24641427,<br>cg24751730,cg13332064,cg06314748,cg04161398,cg12890750,cg03477775,<br>cg00171459,cg11556696,cg02867991,cg02246683,cg09892357,cg09240793,<br>cg00311360,cg00646244,cg24806893,cg00913818,cg10346147,cg18064463,<br>cg10900075,cg01301560,cg04915533,cg01906445,cg11060199,cg01360773,<br>cg14558728,cg03108966,cg13695383,cg02419873,cg12589994,cg14945086,<br>cg08239841,cg16546340,cg11089276,cg07661754,cg15559737,cg04383208,<br>cg18191335,cg07552723,cg08351269,cg00089162,cg06369443,cg14557855,<br>cg18042586,cg03474461,cg16915659,cg13526071,cg00219774,cg15648832,<br>cg14143323,cg11036640,cg15056638,cg23075144,cg19846447,cg10892251,<br>cg12595460,cg12143767,cg26020015,cg21906644,cg11262331,cg06366585,<br>cg03130663,cg03670773,cg15294150,cg05355156,cg01837113,cg03458836,                                                                                                                                                                                                                                                                                                                                                                                                                                                              |

| Intersections | No. of overlapping DMPs | List of overlapping DMPs                                                                                                                                                                                                                                                                                                                                                                                                                                                                                                                                                                                                                                                                                                                                                                                                                                                                                                                                                                                                                                                                                                                                                                                                                                                                                                                                                                                                                                                                                                                                                                                                                                                                                                                                                                                                                                                                                                                                                                                                                                                                                                                                                                                                                                                                                                                                                                                                                                                                                                                                                                                                                                                                                                                                                                                                                                                                                                                                                                                                                                                                                                                                                                             |
|---------------|-------------------------|------------------------------------------------------------------------------------------------------------------------------------------------------------------------------------------------------------------------------------------------------------------------------------------------------------------------------------------------------------------------------------------------------------------------------------------------------------------------------------------------------------------------------------------------------------------------------------------------------------------------------------------------------------------------------------------------------------------------------------------------------------------------------------------------------------------------------------------------------------------------------------------------------------------------------------------------------------------------------------------------------------------------------------------------------------------------------------------------------------------------------------------------------------------------------------------------------------------------------------------------------------------------------------------------------------------------------------------------------------------------------------------------------------------------------------------------------------------------------------------------------------------------------------------------------------------------------------------------------------------------------------------------------------------------------------------------------------------------------------------------------------------------------------------------------------------------------------------------------------------------------------------------------------------------------------------------------------------------------------------------------------------------------------------------------------------------------------------------------------------------------------------------------------------------------------------------------------------------------------------------------------------------------------------------------------------------------------------------------------------------------------------------------------------------------------------------------------------------------------------------------------------------------------------------------------------------------------------------------------------------------------------------------------------------------------------------------------------------------------------------------------------------------------------------------------------------------------------------------------------------------------------------------------------------------------------------------------------------------------------------------------------------------------------------------------------------------------------------------------------------------------------------------------------------------------------------------|
|               |                         | cg04076968,cg01527261,cg01884232,cg16301728,cg20794546,cg06819279,<br>cg16484967,cg26494252,cg06847471,cg04217096,cg15124547,cg25993248,<br>cg03396325,cg03640426,cg00921682,cg14166735,cg08137564,cg14364844,<br>cg08454110,cg09526697,cg08357055,cg00656931,cg11853283,cg09380357,<br>cg11345718,cg24034957,cg22082397,cg18145853,cg26827874,cg27502952,<br>cg05297956,cg02402209,cg18223625,cg14865309,cg02240686,cg02969923,<br>cg11528392,cg19360316,cg20036711,cg11126351,cg04488529,cg00134611,<br>cg02471166,cg02987095,cg04612949,cg15789334,cg23883036,cg02521428,<br>cg08670672,cg27111461,cg07671055,cg02057157,cg04701394,cg00688850,<br>cg18659483,cg24157523,cg15048700,cg04889045,cg03686887,cg08334022,<br>cg13580201,cg01023870,cg26883884,cg18180501,cg18421160,cg15944727,<br>cg26298583,cg13018177,cg04097463,cg14469155,cg14786757,cg23250039,<br>cg20692181,cg09529600,cg27276613,cg27121316,cg08842287,cg16868591,<br>cg02106712,cg04818570,cg13914486,cg07324824,cg24865482,cg11415152,<br>cg02224047,cg04534026,cg03777697,cg01276845,cg09028228,cg25680645,<br>cg01490325,cg02770187,cg01401219,cg10268161,cg20246990,cg15498733,<br>cg00894481,cg16117070,cg19503341,cg08648566,cg17864421,cg16001675,<br>cg19128082,cg23249133,cg12227210,cg11952595,cg14143954,cg07572949,<br>cg15438999,cg25365421,cg10086080,cg21473775,cg25727203,cg01573288,<br>cg23929628,cg22424405,cg09458566,cg06053850,cg02963624,cg10948652,<br>cg23798387,cg16345653,cg18646240,cg24589017,cg11101032,cg21756828,<br>cg13308834,cg13126378,cg24551539,cg01380878,cg22088645,cg12565580,<br>cg05470736,cg07739215,cg23592953,cg23016347,cg25004427,cg14045992,<br>cg24631716,cg20724227,cg22869224,cg05430387,cg18484267,cg01098431,<br>cg03062952,cg22564731,cg00379272,cg19007523,cg21123505,cg15891645,<br>cg19189291,cg25758978,cg02944578,cg08174779,cg23624621,cg11238064,<br>cg07372384,cg13943052,cg05588508,cg08394510,cg10794933,cg02456218,<br>cg18073357,cg00836641,cg27506609,cg09784070,cg12439695,cg17362351,<br>cg16862729,cg19788417,cg21827221,cg11779362,cg14911314,cg02044621,<br>cg12558269,cg14305657,cg18044322,cg02854490,cg21169995,cg09514933,<br>cg02721858,cg15721439,cg20869999,cg24426329,cg14023449,cg12079885,<br>cg12689996,cg10590549,cg11204987,cg05489989,cg08491661,cg12824952,<br>cg14910854,cg07429108,cg00558376,cg11247304,cg18027784,cg13258091,<br>cg03327343,cg20242129,cg14948268,cg02848315,cg17291906,cg08539962,<br>cg10173149,cg26850451,cg21643513,cg14333691,cg00351054,cg10240587,<br>cg18162767,cg02768998,cg18521771,cg10107956,cg26421413,cg18356743,<br>cg13248315,cg12210418,cg12591377,cg00150837,cg04027778,cg22958079,<br>cg23007255,cg00415763,cg11346962,cg06767326,cg13628937,cg07399537,<br>cg23332005,cg03148858,cg11513485,cg04899273,cg03725064,cg09834771,<br>cg12019265,cg16027727,cg19190632,cg10425970,cg03357650,cg12198254,<br>cg22614372,cg11209394,cg03005407,cg23201188,cg25582924,cg24924731,<br>cg20594804,cg13715827,cg05097579,cg22605379,cg20864734,cg18497291,<br>cg13541457,cg08769212,cg09482109,cg10620305,cg03606093,cg22772235,<br>cg19597559,cg21376526,cg14972792,cg04309037,cg18159934,cg20646884, |

| Intersections | No. of overlapping DMPs | List of overlapping DMPs                                                                                                                                                                                                                                                                                                                                                                                                                                                                                                                                                                                                                                                                                                                                                                                                                                                                                                                                                                                                                                                                                                                                                                                                                                                                                                                                                                                                                                                                                                                                                                                                                                                                                                                                                                                                                                                                                                                                                                                                                                                                                                                                                                                                                                                                                                                                                                                                                                                                                                                                                                                                                                                                                                                                                                                                                                                                                                                                                                                                                                                                                                                                                                             |
|---------------|-------------------------|------------------------------------------------------------------------------------------------------------------------------------------------------------------------------------------------------------------------------------------------------------------------------------------------------------------------------------------------------------------------------------------------------------------------------------------------------------------------------------------------------------------------------------------------------------------------------------------------------------------------------------------------------------------------------------------------------------------------------------------------------------------------------------------------------------------------------------------------------------------------------------------------------------------------------------------------------------------------------------------------------------------------------------------------------------------------------------------------------------------------------------------------------------------------------------------------------------------------------------------------------------------------------------------------------------------------------------------------------------------------------------------------------------------------------------------------------------------------------------------------------------------------------------------------------------------------------------------------------------------------------------------------------------------------------------------------------------------------------------------------------------------------------------------------------------------------------------------------------------------------------------------------------------------------------------------------------------------------------------------------------------------------------------------------------------------------------------------------------------------------------------------------------------------------------------------------------------------------------------------------------------------------------------------------------------------------------------------------------------------------------------------------------------------------------------------------------------------------------------------------------------------------------------------------------------------------------------------------------------------------------------------------------------------------------------------------------------------------------------------------------------------------------------------------------------------------------------------------------------------------------------------------------------------------------------------------------------------------------------------------------------------------------------------------------------------------------------------------------------------------------------------------------------------------------------------------------|
|               |                         | cg22634105,cg21274724,cg19239278,cg26878318,cg05644518,cg08229522,<br>cg27315695,cg10048986,cg13983495,cg07205661,cg01003176,cg13417485,<br>cg09294038,cg00112367,cg09285808,cg25625985,cg10198000,cg03526614,<br>cg23571126,cg20835555,cg01553653,cg08789741,cg08181060,cg25109031,<br>cg07450021,cg26914630,cg27228191,cg25391562,cg07060261,cg25143871,<br>cg17503596,cg06771275,cg00381789,cg27185511,cg01454540,cg01694554,<br>cg12193649,cg04390274,cg10316026,cg19540291,cg15965155,cg23196919,<br>cg24369048,cg10833829,cg10099056,cg11507713,cg25677288,cg01437450,<br>cg14768899,cg21442556,cg23484515,cg07983330,cg27373063,cg13331011,<br>cg00763190,cg26163463,cg17547157,cg10171332,cg15978191,cg18964454,<br>cg02709717,cg01915885,cg16846728,cg16601146,cg00338685,cg04693379,<br>cg05554735,cg25638229,cg25428810,cg25494536,cg01129439,cg04892672,<br>cg02959866,cg17216549,cg23972904,cg20747789,cg20638805,cg11208348,<br>cg01237677,cg13767162,cg17212500,cg12355108,cg08339324,cg21838933,<br>cg06815586,cg22129614,cg06459926,cg08289176,cg16147794,cg06663970,<br>cg23241950,cg21429544,cg09810870,cg24755177,cg13579226,cg18267124,<br>cg03634073,cg02420927,cg01326942,cg22284390,cg13812249,cg16545196,<br>cg22349487,cg10625488,cg00571067,cg23392434,cg08602694,cg24708674,<br>cg21003470,cg06059483,cg00695265,cg02824489,cg19521912,cg19329225,<br>cg20473622,cg23457357,cg25192591,cg02062970,cg26472922,cg21764101,<br>cg19911185,cg26352502,cg25275860,cg09582000,cg18989499,cg19110428,<br>cg24423329,cg00655283,cg02780120,cg16308672,cg00509057,cg07179556,<br>cg10496511,cg00423291,cg03464560,cg19517402,cg00860550,cg14182819,<br>cg13569449,cg02311588,cg15695624,cg05242653,cg16252322,cg21386099,<br>cg02990742,cg13897316,cg19887630,cg16817668,cg14224170,cg09640135,<br>cg19464037,cg19087888,cg14939553,cg24301692,cg02868222,cg16409456,<br>cg00361155,cg25927259,cg08210300,cg18589278,cg00044501,cg23226387,<br>cg26751868,cg10390329,cg04482971,cg04142312,cg05374263,cg24028459,<br>cg00167836,cg23374864,cg03686228,cg22238406,cg03870411,cg26680765,<br>cg14500563,cg08923066,cg00966078,cg07151047,cg23047079,cg04061225,<br>cg04905173,cg14099160,cg04805794,cg19666555,cg23334804,cg04773669,<br>cg10578897,cg06836020,cg11051391,cg25519921,cg12532546,cg01459748,<br>cg03804556,cg25884094,cg14953536,cg07718254,cg24611115,cg06215939,<br>cg08369295,cg27105914,cg10507156,cg00089154,cg26493814,cg23155468,<br>cg24738257,cg11724156,cg26726204,cg23509128,cg01794812,cg13096779,<br>cg00415924,cg11254196,cg18578309,cg02705940,cg16758764,cg21548096,<br>cg02800334,cg22012693,cg12098623,cg02150335,cg27382393,cg15102821,<br>cg11574130,cg02844984,cg14774273,cg22117193,cg21853296,cg10496302,<br>cg24707982,cg11325180,cg09612912,cg19638039,cg09604762,cg23268344,<br>cg00465198,cg05844402,cg21651356,cg27488741,cg02050202,cg18180230,<br>cg12041429,cg23007574,cg04084436,cg21186506,cg19828499,cg27032353,<br>cg15044252,cg05203949,cg06377825,cg09120959,cg00214780,cg06995113,<br>cg17299886,cg00166343,cg13971262,cg09269336,cg16890939,cg16209364,<br>cg09916234,cg14190196,cg22475952,cg20676413,cg22493413,cg02971604, |

| Intersections | No. of overlapping DMPs | List of overlapping DMPs                                                                                                                                                                                                                                                                                                                                                                                                                                                                                                                                                                                                                                                                                                                                                                                                                                                                                                                                                                                                                                                                                                                                                                                                                                                                                                                                                                                                                                                                                                                                                                                                                                                                                                                                                                                                                                                                                                                                                                                                                                                                                                                                                                                                                                                                                                                                                                                                                                                                                                                                                                                                                                                                                                                                                                                                                                                                                                                                                                                                                                                                                                                                                                             |
|---------------|-------------------------|------------------------------------------------------------------------------------------------------------------------------------------------------------------------------------------------------------------------------------------------------------------------------------------------------------------------------------------------------------------------------------------------------------------------------------------------------------------------------------------------------------------------------------------------------------------------------------------------------------------------------------------------------------------------------------------------------------------------------------------------------------------------------------------------------------------------------------------------------------------------------------------------------------------------------------------------------------------------------------------------------------------------------------------------------------------------------------------------------------------------------------------------------------------------------------------------------------------------------------------------------------------------------------------------------------------------------------------------------------------------------------------------------------------------------------------------------------------------------------------------------------------------------------------------------------------------------------------------------------------------------------------------------------------------------------------------------------------------------------------------------------------------------------------------------------------------------------------------------------------------------------------------------------------------------------------------------------------------------------------------------------------------------------------------------------------------------------------------------------------------------------------------------------------------------------------------------------------------------------------------------------------------------------------------------------------------------------------------------------------------------------------------------------------------------------------------------------------------------------------------------------------------------------------------------------------------------------------------------------------------------------------------------------------------------------------------------------------------------------------------------------------------------------------------------------------------------------------------------------------------------------------------------------------------------------------------------------------------------------------------------------------------------------------------------------------------------------------------------------------------------------------------------------------------------------------------------|
|               |                         | cg02984966,cg24156393,cg08182409,cg12177010,cg20097407,cg16018548,<br>cg27127202,cg05570153,cg07274300,cg14960489,cg24210426,cg05385188,<br>cg22649290,cg00400654,cg10740203,cg07590922,cg08796647,cg10744268,<br>cg17187041,cg05987389,cg17103026,cg00575342,cg13621925,cg12802413,<br>cg02147805,cg22250376,cg09753762,cg06211041,cg00571466,cg17806882,<br>cg24307117,cg27534317,cg22972187,cg22331840,cg12221729,cg27582094,<br>cg11202620,cg09691127,cg05678871,cg25477163,cg08815261,cg21499175,<br>cg13096307,cg08858091,cg07562687,cg20367788,cg09997119,cg14338801,<br>cg03269429,cg24453767,cg20145601,cg00321115,cg26273127,cg21585068,<br>cg19514148,cg02181143,cg03607054,cg05242523,cg14068721,cg24752624,<br>cg22643337,cg00771316,cg21078247,cg15528579,cg12043511,cg21377260,<br>cg24274354,cg10088941,cg03803150,cg02780400,cg23894755,cg10993503,<br>cg23353281,cg21778229,cg08008141,cg14593420,cg09513647,cg07753245,<br>cg08621277,cg00062285,cg00845626,cg26013057,cg13934560,cg15220697,<br>cg22817650,cg05281623,cg18690271,cg05543443,cg09319020,cg26044032,<br>cg05754632,cg13038229,cg15327998,cg20138486,cg25958261,cg07015465,<br>cg16465369,cg02341729,cg08163798,cg08627569,cg01232121,cg14330713,<br>cg10231500,cg02968179,cg16345272,cg03596320,cg02355043,cg06439489,<br>cg06300012,cg16532100,cg23043218,cg05357229,cg10821976,cg01201744,<br>cg27582696,cg00085889,cg13460465,cg25631436,cg18533237,cg07576098,<br>cg13390361,cg15691035,cg17275695,cg03241046,cg20029657,cg08665079,<br>cg12483357,cg23641305,cg22919686,cg19963309,cg22869634,cg11827743,<br>cg26040729,cg04537229,cg11797265,cg24324942,cg26325497,cg19510699,<br>cg18934822,cg02261895,cg26484916,cg07232823,cg11015356,cg06695566,<br>cg12003990,cg20529334,cg13288599,cg24871371,cg06574139,cg05481217,<br>cg24048806,cg07088430,cg23242649,cg11396122,cg25559103,cg12752449,<br>cg02144870,cg04860082,cg23272987,cg03861798,cg16052972,cg04262892,<br>cg03446092,cg05906717,cg02622542,cg26881207,cg27258878,cg18488204,<br>cg16577533,cg11494887,cg20572967,cg05078091,cg06598386,cg00340928,<br>cg10885089,cg15360468,cg20321498,cg14975798,cg18236358,cg21628854,<br>cg06840895,cg11791847,cg19707638,cg05765440,cg00869962,cg25479093,<br>cg18385457,cg15759889,cg02345638,cg08224649,cg09738193,cg13599051,<br>cg11492288,cg23055003,cg09530179,cg23693380,cg14367513,cg25288627,<br>cg18817246,cg07364632,cg18056738,cg25605038,cg01476138,cg17084358,<br>cg18783135,cg01095406,cg16735509,cg26968804,cg10071277,cg01391060,<br>cg26325163,cg15814092,cg17145196,cg12115081,cg01836858,cg24202638,<br>cg09309979,cg11776325,cg03191384,cg20788199,cg03694795,cg14511089,<br>cg02912476,cg24536474,cg09045787,cg06297318,cg21532334,cg03691285,<br>cg14085247,cg23253460,cg21352393,cg18536843,cg13571582,cg10665123,<br>cg25349265,cg13880254,cg05231930,cg22508530,cg20788115,cg06141780,<br>cg17100390,cg10310944,cg02393535,cg16562257,cg13741103,cg26028571,<br>cg21547845,cg14407184,cg22736267,cg25904166,cg01370111,cg01198359,<br>cg18700146,cg09777036,cg19875535,cg20208129,cg11619648,cg09786062,<br>cg01377475,cg25045700,cg10232190,cg21240283,cg24493120,cg24284859, |

| Intersections | No. of overlapping DMPs | List of overlapping DMPs                                                                                                                                                                                                                                                                                                                                                                                                                                                                                                                                                                                                                                                                                                                                                                                                                                                                                                                                                                                                                                                                                                                                                                                                                                                                                                                                                                                                                                                                                                                                                                                                                                                                                                                                                                                                                                                                                                                                                                                                                                                                                                                                                                                                                                                                                                                                                                                                                                                                                                                                                                                                                                                                                                                                                                                                                                                                                                                                                                                                                                                                                                                                                                             |
|---------------|-------------------------|------------------------------------------------------------------------------------------------------------------------------------------------------------------------------------------------------------------------------------------------------------------------------------------------------------------------------------------------------------------------------------------------------------------------------------------------------------------------------------------------------------------------------------------------------------------------------------------------------------------------------------------------------------------------------------------------------------------------------------------------------------------------------------------------------------------------------------------------------------------------------------------------------------------------------------------------------------------------------------------------------------------------------------------------------------------------------------------------------------------------------------------------------------------------------------------------------------------------------------------------------------------------------------------------------------------------------------------------------------------------------------------------------------------------------------------------------------------------------------------------------------------------------------------------------------------------------------------------------------------------------------------------------------------------------------------------------------------------------------------------------------------------------------------------------------------------------------------------------------------------------------------------------------------------------------------------------------------------------------------------------------------------------------------------------------------------------------------------------------------------------------------------------------------------------------------------------------------------------------------------------------------------------------------------------------------------------------------------------------------------------------------------------------------------------------------------------------------------------------------------------------------------------------------------------------------------------------------------------------------------------------------------------------------------------------------------------------------------------------------------------------------------------------------------------------------------------------------------------------------------------------------------------------------------------------------------------------------------------------------------------------------------------------------------------------------------------------------------------------------------------------------------------------------------------------------------------|
|               |                         | cg18752867,cg07540629,cg08066917,cg07473590,cg22542955,cg14275273,<br>cg11675409,cg13524563,cg25490276,cg14831745,cg17439158,cg06838584,<br>cg07360644,cg05294259,cg09290177,cg15540749,cg14840389,cg14985591,<br>cg00847250,cg10090044,cg09277086,cg22734427,cg08969328,cg17935677,<br>cg09756436,cg13974798,cg24966460,cg02072104,cg08868423,cg07797421,<br>cg15284457,cg01957971,cg17311921,cg26305717,cg09664554,cg04371703,<br>cg21101995,cg25149391,cg13741070,cg17981254,cg18241189,cg00383735,<br>cg08549326,cg27506139,cg17859655,cg00041865,cg08498247,cg07937578,<br>cg10474284,cg23949901,cg16299131,cg10211725,cg09683623,cg20076039,<br>cg24704635,cg11861406,cg15166642,cg03642066,cg06546849,cg19643315,<br>cg03089512,cg07687820,cg16869108,cg01402948,cg24682482,cg09325695,<br>cg18594724,cg00959027,cg16997671,cg15658344,cg21416181,cg23812948,<br>cg03779326,cg24846791,cg03401477,cg21740507,cg21351140,cg27408262,<br>cg04925220,cg10076508,cg23022783,cg14433428,cg11987682,cg15020247,<br>cg10467926,cg01502484,cg11966063,cg07602776,cg20466739,cg08128444,<br>cg08577509,cg10617396,cg25468928,cg00390120,cg16288220,cg09815235,<br>cg22557711,cg26293920,cg25002540,cg23691873,cg04964733,cg24456094,<br>cg20250922,cg24602093,cg21593149,cg24345166,cg12340381,cg23950767,<br>cg00687812,cg13840590,cg11067885,cg13151361,cg26256837,cg00307501,<br>cg16462462,cg04089197,cg07586906,cg25229198,cg19804570,cg17482273,<br>cg12878786,cg13925235,cg20613639,cg03423957,cg06977264,cg14605001,<br>cg25644257,cg03108250,cg03238709,cg22884082,cg11335419,cg06351029,<br>cg16759615,cg15661251,cg15527491,cg23245898,cg24843535,cg21057349,<br>cg00324520,cg00223863,cg23424400,cg25401621,cg20413331,cg01648784,<br>cg22911184,cg10058885,cg08397205,cg27342505,cg23816594,cg07538838,<br>cg27271732,cg23488395,cg05708629,cg14863101,cg20960167,cg23566468,<br>cg13802942,cg08145495,cg20988870,cg01959405,cg06540908,cg27021666,<br>cg17752268,cg15281406,cg25278126,cg26935729,cg04814317,cg22046143,<br>cg11517528,cg09217023,cg15301282,cg23637167,cg08380150,cg25659288,<br>cg26888227,cg01149053,cg26899591,cg24552802,cg02827132,cg12611243,<br>cg13401212,cg24616366,cg05208416,cg24074054,cg26883472,cg18416823,<br>cg22998918,cg09704152,cg14380065,cg04498159,cg27476881,cg14737263,<br>cg16189976,cg11147497,cg08659517,cg00340744,cg24927841,cg02405484,<br>cg06373919,cg14978741,cg16710731,cg06423617,cg24259560,cg07393618,<br>cg06779329,cg02949523,cg14376618,cg13876071,cg07405806,cg14390884,<br>cg03436428,cg23051632,cg27314760,cg23817265,cg17012502,cg16750112,<br>cg05034125,cg24917883,cg19771350,cg11757672,cg16142054,cg22723249,<br>cg06396527,cg22219933,cg17848515,cg15124343,cg10648815,cg19653701,<br>cg00086171,cg17227941,cg02449564,cg11935592,cg19479828,cg10622684,<br>cg04013419,cg25610960,cg16786949,cg07473599,cg02650789,cg02133456,<br>cg08900656,cg24907569,cg27568983,cg18275339,cg01308483,cg04270402,<br>cg00568426,cg22258490,cg03467501,cg16714273,cg23689419,cg25326090,<br>cg05143332,cg08284758,cg06833647,cg25482228,cg18309935,cg26323746,<br>cg04188238,cg08321145,cg20335039,cg16043230,cg01633517,cg09640718, |



| Intersections | No. of overlapping DMPs | List of overlapping DMPs                                                                                                                                                                                                                                                                                                                                                                                                                                                                                                                                                                                                                                                                                                                                                                                                                                                                                                                                                                                                                                                                                                                                                                                                                                                                                                                                                                                                                                                                                                                                                                                                                                                                                                                                                                                                                                                                                                                                                                                                                                                                                                                                                                                                                                                                                                                                                                                                                                                                                                                                                                                                                                                                                                                                                                                                                                                                                                                                                                                                                                                                                                                                                                             |
|---------------|-------------------------|------------------------------------------------------------------------------------------------------------------------------------------------------------------------------------------------------------------------------------------------------------------------------------------------------------------------------------------------------------------------------------------------------------------------------------------------------------------------------------------------------------------------------------------------------------------------------------------------------------------------------------------------------------------------------------------------------------------------------------------------------------------------------------------------------------------------------------------------------------------------------------------------------------------------------------------------------------------------------------------------------------------------------------------------------------------------------------------------------------------------------------------------------------------------------------------------------------------------------------------------------------------------------------------------------------------------------------------------------------------------------------------------------------------------------------------------------------------------------------------------------------------------------------------------------------------------------------------------------------------------------------------------------------------------------------------------------------------------------------------------------------------------------------------------------------------------------------------------------------------------------------------------------------------------------------------------------------------------------------------------------------------------------------------------------------------------------------------------------------------------------------------------------------------------------------------------------------------------------------------------------------------------------------------------------------------------------------------------------------------------------------------------------------------------------------------------------------------------------------------------------------------------------------------------------------------------------------------------------------------------------------------------------------------------------------------------------------------------------------------------------------------------------------------------------------------------------------------------------------------------------------------------------------------------------------------------------------------------------------------------------------------------------------------------------------------------------------------------------------------------------------------------------------------------------------------------------|
|               |                         | cg01711850,cg09455239,cg20550536,cg17265330,cg27207764,cg15886307,<br>cg10581754,cg19850931,cg21228642,cg20429277,cg19645839,cg03026080,<br>cg14258645,cg25447019,cg12510271,cg07380106,cg07478893,cg23863619,<br>cg04177517,cg27350326,cg00040486,cg21949997,cg04978451,cg00660009,<br>cg00594793,cg00801360,cg20694666,cg16468183,cg26204448,cg16174071,<br>cg07812459,cg05402641,cg22799069,cg05363350,cg02951457,cg05052501,<br>cg27005906,cg14707886,cg23522840,cg12600843,cg13400284,cg14867639,<br>cg10840054,cg08538416,cg27424057,cg04945335,cg14095321,cg23955334,<br>cg23081204,cg22840583,cg06364293,cg22157398,cg05914369,cg13535489,<br>cg04728073,cg18169800,cg04377849,cg07725685,cg18182475,cg11011759,<br>cg01308806,cg14212360,cg00537709,cg16401578,cg08961047,cg02246427,<br>cg10751914,cg14223485,cg17588491,cg09565692,cg01038517,cg08749095,<br>cg23965109,cg14465410,cg00540819,cg21668391,cg25519056,cg11230363,<br>cg15164048,cg24122991,cg25477334,cg24750627,cg18791823,cg01317217,<br>cg08395822,cg11221023,cg03972852,cg23977502,cg23536509,cg00738299,<br>cg25472172,cg05476998,cg07542043,cg18535456,cg03842980,cg18883976,<br>cg06668647,cg20728496,cg04028541,cg05076103,cg17576104,cg27285968,<br>cg21527414,cg07979579,cg12379755,cg27303211,cg11763017,cg12281517,<br>cg11371953,cg06840167,cg25782778,cg21093215,cg07602317,cg03913000,<br>cg11209001,cg27304437,cg09561458,cg11816739,cg18589846,cg03151258,<br>cg05377587,cg03216491,cg12852407,cg06003083,cg26416766,cg02026611,<br>cg14332139,cg14962943,cg02064831,cg19462712,cg04612349,cg10104129,<br>cg06833721,cg04892443,cg27089146,cg01099448,cg11382976,cg08821968,<br>cg14652369,cg08280358,cg20084815,cg23685885,cg19758385,cg26369178,<br>cg23248208,cg10169183,cg03449621,cg15463964,cg13663416,cg17459911,<br>cg05267740,cg15095581,cg06192220,cg08806261,cg04774364,cg14500628,<br>cg19988798,cg26714086,cg26611926,cg00321074,cg05612506,cg20586531,<br>cg24668728,cg12866401,cg14315334,cg15263723,cg23254737,cg26502549,<br>cg24828975,cg06440169,cg27625887,cg02400009,cg10805645,cg05833629,<br>cg09254350,cg02311189,cg09930167,cg26341749,cg18809463,cg00710269,<br>cg06488615,cg05496988,cg07592136,cg03994617,cg22179905,cg08642528,<br>cg17753475,cg13234088,cg24036612,cg07964833,cg08531025,cg15470705,<br>cg06123714,cg13539591,cg14830815,cg08063891,cg14675896,cg08988226,<br>cg05274179,cg00393247,cg21325040,cg06787317,cg23889301,cg11120049,<br>cg04442311,cg05103956,cg10224939,cg24589858,cg26631127,cg04060943,<br>cg04250180,cg21311736,cg08862717,cg21224669,cg10399850,cg20028483,<br>cg01320920,cg25469905,cg14168059,cg24904992,cg02663175,cg10655371,<br>cg14496314,cg19779005,cg01050005,cg04062303,cg11921411,cg10825481,<br>cg24587796,cg08034613,cg04359302,cg03155271,cg00967405,cg18381729,<br>cg01703966,cg18788349,cg10504120,cg02838089,cg26523866,cg24975723,<br>cg03011822,cg19475108,cg04721719,cg11948339,cg20852378,cg13168638,<br>cg00349636,cg01331064,cg00704176,cg06807791,cg19542548,cg00222625,<br>cg21510284,cg17996603,cg24732062,cg25547286,cg00412526,cg08272783,<br>cg02389050,cg14048487,cg03475756,cg00241482,cg05300773,cg06043512, |

| Intersections | No. of overlapping DMPs | List of overlapping DMPs                                                                                                                                                                                                                                                                                                                                                                                                                                                                                                                                                                                                                                                                                                                                                                                                                                                                                                                                                                                                                                                                                                                                                                                                                                                                                                                                                                                                                                                                                                                                                                                                                                                                                                                                                                                                                                                                                                                                                                                                                                                                                                                                                                                                                                                                                                                                                                                                                                                                                                                                                                                                                                                                                                                                                                                                                                                                                                                                                                                                                                                                                                                                                                             |
|---------------|-------------------------|------------------------------------------------------------------------------------------------------------------------------------------------------------------------------------------------------------------------------------------------------------------------------------------------------------------------------------------------------------------------------------------------------------------------------------------------------------------------------------------------------------------------------------------------------------------------------------------------------------------------------------------------------------------------------------------------------------------------------------------------------------------------------------------------------------------------------------------------------------------------------------------------------------------------------------------------------------------------------------------------------------------------------------------------------------------------------------------------------------------------------------------------------------------------------------------------------------------------------------------------------------------------------------------------------------------------------------------------------------------------------------------------------------------------------------------------------------------------------------------------------------------------------------------------------------------------------------------------------------------------------------------------------------------------------------------------------------------------------------------------------------------------------------------------------------------------------------------------------------------------------------------------------------------------------------------------------------------------------------------------------------------------------------------------------------------------------------------------------------------------------------------------------------------------------------------------------------------------------------------------------------------------------------------------------------------------------------------------------------------------------------------------------------------------------------------------------------------------------------------------------------------------------------------------------------------------------------------------------------------------------------------------------------------------------------------------------------------------------------------------------------------------------------------------------------------------------------------------------------------------------------------------------------------------------------------------------------------------------------------------------------------------------------------------------------------------------------------------------------------------------------------------------------------------------------------------------|
|               |                         | cg18089238,cg10884633,cg10134583,cg02642833,cg24217980,cg21231853,<br>cg20735242,cg18453188,cg03457485,cg05343548,cg15553710,cg26105731,<br>cg20690856,cg24583410,cg21544702,cg11784214,cg04589118,cg20358075,<br>cg23373966,cg16760291,cg14024083,cg24049084,cg05781798,cg10774367,<br>cg26976060,cg18814048,cg11248957,cg21647407,cg03128614,cg16412148,<br>cg27144306,cg09361751,cg18678231,cg22698031,cg04380278,cg24107165,<br>cg16583381,cg17081998,cg19896351,cg12240828,cg14705208,cg12575429,<br>cg20149531,cg07981140,cg22988865,cg17600233,cg23542414,cg24890976,<br>cg05766943,cg23493751,cg26102342,cg19977683,cg22482142,cg18030084,<br>cg02634762,cg11806305,cg20052431,cg16051599,cg26297203,cg00910319,<br>cg13560919,cg08834459,cg02078896,cg16349724,cg27607520,cg13601636,<br>cg00336022,cg21630243,cg02580987,cg27631638,cg15074266,cg19134770,<br>cg11528069,cg13976610,cg20378199,cg22788109,cg16579136,cg24486867,<br>cg22375623,cg17378387,cg14461450,cg15147841,cg22772698,cg07463167,<br>cg00727386,cg21157357,cg24929754,cg17216301,cg06336871,cg08527226,<br>cg14195971,cg03555579,cg01861664,cg16116663,cg02958915,cg00146334,<br>cg04349162,cg02606575,cg21059786,cg13985868,cg05737522,cg27024083,<br>cg01571560,cg20060185,cg18965620,cg08461425,cg24021800,cg03212228,<br>cg26475285,cg03660331,cg04379416,cg24064325,cg04533549,cg11661235,<br>cg03409144,cg22673336,cg14893473,cg13265607,cg17443821,cg13882046,<br>cg19973085,cg16771862,cg01853986,cg01954057,cg18420708,cg10948220,<br>cg25653886,cg14447733,cg19457908,cg00739139,cg04993605,cg00779304,<br>cg22996588,cg21772589,cg16307399,cg26341003,cg12589566,cg05279382,<br>cg18631513,cg19249583,cg20667960,cg14376110,cg14759548,cg07275480,<br>cg15403961,cg07327927,cg09406715,cg14991562,cg05072063,cg08964756,<br>cg07600669,cg22641542,cg00338377,cg10830021,cg16255462,cg08525476,<br>cg12980798,cg02279591,cg19632366,cg09312279,cg16543876,cg21801085,<br>cg01921212,cg05823818,cg00767403,cg01650612,cg03983808,cg22140583,<br>cg09333836,cg15956049,cg27381618,cg25326998,cg05730992,cg23352067,<br>cg24202922,cg09970332,cg14127641,cg12539194,cg06515617,cg07841529,<br>cg02197019,cg20915907,cg04912438,cg12156012,cg00994644,cg03233224,<br>cg24194093,cg20901993,cg15003833,cg14706226,cg03038520,cg09273289,<br>cg20284705,cg02602268,cg10673431,cg11555640,cg09793796,cg09889228,<br>cg23130946,cg24990022,cg26707265,cg22274522,cg11259254,cg11737081,<br>cg24470929,cg15836199,cg18516241,cg15992711,cg10493270,cg13186010,<br>cg09226290,cg25241823,cg08559214,cg25499769,cg25362169,cg04565216,<br>cg02316852,cg08547873,cg05573149,cg06659875,cg08952300,cg10076958,<br>cg24152297,cg02136723,cg13335769,cg01586011,cg14926216,cg09499747,<br>cg26006672,cg06815630,cg13483099,cg09197288,cg03516394,cg12181730,<br>cg09241714,cg14894369,cg13936208,cg00815484,cg07460894,cg15856832,<br>cg00267196,cg26133909,cg19761060,cg26789319,cg17533142,cg06483795,<br>cg23520478,cg01269913,cg13073589,cg14956546,cg23780049,cg08306333,<br>cg15223933,cg25491247,cg26719056,cg01367751,cg06700353,cg09112262,<br>cg12932539,cg15680557,cg25667409,cg24843157,cg16621856,cg03113271, |

| Intersections | No. of overlapping DMPs | List of overlapping DMPs                                                                                                                                                                                                                                                                                                                                                                                                                                                                                                                                                                                                                                                                                                                                                                                                                                                                                                                                                                                                                                                                                                                                                                                                                                                                                                                                                                                                                                                                                                                                                                                                                                                                                                                                                                                                                                                                                                                                                                                                                                                                                                                                                                                                                                                                                                                                                                                                                                                                                                                                                                                                                                                                                                                                                                                                                                                                                                                                                                                                                                                                                                                                                                             |
|---------------|-------------------------|------------------------------------------------------------------------------------------------------------------------------------------------------------------------------------------------------------------------------------------------------------------------------------------------------------------------------------------------------------------------------------------------------------------------------------------------------------------------------------------------------------------------------------------------------------------------------------------------------------------------------------------------------------------------------------------------------------------------------------------------------------------------------------------------------------------------------------------------------------------------------------------------------------------------------------------------------------------------------------------------------------------------------------------------------------------------------------------------------------------------------------------------------------------------------------------------------------------------------------------------------------------------------------------------------------------------------------------------------------------------------------------------------------------------------------------------------------------------------------------------------------------------------------------------------------------------------------------------------------------------------------------------------------------------------------------------------------------------------------------------------------------------------------------------------------------------------------------------------------------------------------------------------------------------------------------------------------------------------------------------------------------------------------------------------------------------------------------------------------------------------------------------------------------------------------------------------------------------------------------------------------------------------------------------------------------------------------------------------------------------------------------------------------------------------------------------------------------------------------------------------------------------------------------------------------------------------------------------------------------------------------------------------------------------------------------------------------------------------------------------------------------------------------------------------------------------------------------------------------------------------------------------------------------------------------------------------------------------------------------------------------------------------------------------------------------------------------------------------------------------------------------------------------------------------------------------------|
|               |                         | cg27209175,cg18593073,cg18467551,cg16245495,cg21167587,cg11579447,<br>cg04844516,cg18696805,cg02618000,cg16096085,cg07134622,cg04343242,<br>cg05976571,cg06020868,cg21152662,cg10302285,cg15401058,cg08897302,<br>cg19814520,cg20821992,cg27495951,cg18969709,cg20882571,cg17599298,<br>cg03890634,cg24125910,cg18901378,cg18469747,cg19288514,cg25728543,<br>cg12530864,cg18758339,cg08659785,cg15556873,cg24558112,cg16000824,<br>cg17586419,cg01325840,cg15185244,cg03123170,cg10208083,cg11090641,<br>cg06029376,cg12808990,cg01212680,cg00809453,cg21408734,cg21244845,<br>cg07356283,cg12765632,cg24613956,cg16038269,cg09447749,cg20840778,<br>cg15372862,cg04533214,cg05736906,cg19027126,cg26586942,cg03737209,<br>cg19674611,cg16335566,cg24714100,cg27326127,cg05033560,cg10573450,<br>cg10191404,cg24575651,cg00346673,cg24904103,cg23687958,cg13581752,<br>cg16314538,cg10276665,cg03232621,cg04026763,cg22736383,cg00649211,<br>cg12183221,cg13579926,cg21043328,cg19109130,cg12156301,cg00322636,<br>cg14821382,cg19679907,cg24604179,cg15379240,cg22345349,cg07590638,<br>cg18002794,cg04043623,cg21196575,cg16419334,cg24743791,cg27429663,<br>cg03053581,cg16281582,cg21532323,cg04436431,cg03783948,cg10597337,<br>cg08691275,cg23889393,cg05082920,cg17203119,cg25771226,cg25836827,<br>cg21125848,cg25382025,cg19015686,cg07299078,cg12732791,cg05268347,<br>cg20075927,cg24725441,cg14256726,cg04868072,cg07743179,cg25396464,<br>cg05054831,cg06660522,cg20445518,cg10329699,cg25824209,cg02616069,<br>cg10635686,cg20705908,cg21942150,cg25320496,cg09945822,cg01807303,<br>cg07927482,cg20796544,cg01908874,cg22686253,cg09932730,cg20099906,<br>cg02942186,cg04576317,cg03928133,cg18703875,cg03907995,cg17833937,<br>cg14403762,cg17092609,cg16546489,cg16952929,cg26438672,cg16696019,<br>cg16393125,cg24529493,cg15189797,cg16528891,cg22609459,cg10438671,<br>cg15574362,cg12358298,cg22836066,cg03103952,cg04234556,cg26945780,<br>cg08833787,cg14742920,cg19081751,cg14764876,cg00397989,cg15334572,<br>cg15656470,cg15582335,cg08119847,cg12581354,cg14075156,cg12565693,<br>cg04465185,cg01961025,cg02261637,cg17168358,cg07887939,cg03706883,<br>cg04893543,cg26944546,cg10105974,cg21618529,cg26703520,cg25071880,<br>cg10987801,cg09189978,cg22309080,cg25574190,cg04388075,cg06962592,<br>cg24031228,cg14208859,cg24074432,cg06934003,cg25013571,cg13382117,<br>cg14146491,cg04261102,cg11277260,cg22591672,cg13873902,cg10719247,<br>cg00549234,cg07841686,cg23213158,cg02043219,cg07062938,cg02290978,<br>cg16457259,cg18376227,cg15066992,cg09075968,cg04460747,cg01529454,<br>cg08827274,cg17240701,cg21825944,cg13244886,cg06420058,cg19156941,<br>cg17265790,cg17362299,cg24802374,cg14661969,cg02988795,cg06563713,<br>cg23244169,cg20561213,cg10011978,cg04566233,cg04943797,cg04141261,<br>cg19800728,cg08329428,cg08432712,cg25285383,cg09294492,cg08001899,<br>cg09131903,cg23403117,cg02516530,cg21464596,cg24878059,cg03996123,<br>cg27447083,cg10929866,cg15604158,cg04651240,cg10247061,cg19592720,<br>cg02642298,cg07491206,cg03834906,cg08828531,cg18917736,cg24987706,<br>cg05771997,cg21341391,cg14870682,cg20219894,cg01230154,cg06902235, |

| Intersections | No. of overlapping DMPs | List of overlapping DMPs                                                                                                                                                                                                                                                                                                                                                                                                                                                                                                                                                                                                                                                                                                                                                                                                                                                                                                                                                                                                                                                                                                                                                                                                                                                                                                                                                                                                                                                                                                                                                                                                                                                                                                                                                                                                                                                                                                                                                                                                                                                                                                                                                                                                                                                                                                                                                                                                                                                 |
|---------------|-------------------------|--------------------------------------------------------------------------------------------------------------------------------------------------------------------------------------------------------------------------------------------------------------------------------------------------------------------------------------------------------------------------------------------------------------------------------------------------------------------------------------------------------------------------------------------------------------------------------------------------------------------------------------------------------------------------------------------------------------------------------------------------------------------------------------------------------------------------------------------------------------------------------------------------------------------------------------------------------------------------------------------------------------------------------------------------------------------------------------------------------------------------------------------------------------------------------------------------------------------------------------------------------------------------------------------------------------------------------------------------------------------------------------------------------------------------------------------------------------------------------------------------------------------------------------------------------------------------------------------------------------------------------------------------------------------------------------------------------------------------------------------------------------------------------------------------------------------------------------------------------------------------------------------------------------------------------------------------------------------------------------------------------------------------------------------------------------------------------------------------------------------------------------------------------------------------------------------------------------------------------------------------------------------------------------------------------------------------------------------------------------------------------------------------------------------------------------------------------------------------|
|               |                         | cg00440702,cg06193995,cg15189860,cg02323296,cg04684390,cg06907056,<br>cg12284736,cg05895956,cg12062067,cg25543190,cg00400085,cg09668276,<br>cg14880184,cg14435997,cg05513661,cg09845205,cg26252027,cg21133608,<br>cg00903154,cg25947600,cg21445204,cg18712148,cg07252892,cg01251118,<br>cg04963523,cg03125787,cg13784878,cg14574871,cg18182059,cg04561294,<br>cg21182103,cg06683481,cg25764839,cg03689082,cg02926797,cg09479793,<br>cg27089079,cg06033859,cg24739950,cg21165395,cg12328023,cg18280859,<br>cg13003329,cg27078893,cg14167748,cg16196745,cg18399457,cg26318674,<br>cg24069815,cg07488365                                                                                                                                                                                                                                                                                                                                                                                                                                                                                                                                                                                                                                                                                                                                                                                                                                                                                                                                                                                                                                                                                                                                                                                                                                                                                                                                                                                                                                                                                                                                                                                                                                                                                                                                                                                                                                                                    |
|               |                         | cg09463174,cg25272394,cg19002680,cg18373317,cg24606352,cg04558749,<br>cg09150075,cg02385739,cg17685800,cg17911958,cg13103473,cg25997394,<br>cg23673553,cg15519565,cg02246063,cg16734258,cg25364573,cg10460813,<br>cg27437868,cg00228355,cg02022978,cg19188370,cg07146531,cg26626287,<br>cg21818901,cg09067990,cg01732465,cg12977937,cg02577078,cg11102844,<br>cg20609063,cg00844404,cg18761929,cg15633107,cg05122441,cg14178937,<br>cg26242334,cg06923775,cg00395140,cg12629264,cg23519421,cg01654519,<br>cg26139168,cg09113046,cg00382572,cg18222240,cg06578353,cg20192041,<br>cg16201822,cg13324337,cg18234973,cg05456482,cg13864749,cg23101564,<br>cg03949031,cg25230945,cg13855384,cg11835050,cg15592863,cg03174275,<br>cg14422179,cg05716269,cg16340755,cg21069563,cg22001073,cg04950762,<br>cg03387593,cg00756734,cg01600921,cg00364281,cg07799157,cg22722807,<br>cg27047316,cg17307811,cg20672245,cg18135087,cg21216618,cg22802174,<br>cg13415320,cg11003426,cg09766327,cg19596655,cg07427559,cg24445752,<br>cg22227726,cg24690924,cg03218931,cg16638580,cg04612869,cg09153950,<br>cg27360762,cg02967787,cg19593680,cg15157403,cg21868353,cg01065748,<br>cg23066675,cg04766314,cg08032884,cg10458893,cg02737022,cg10539298,<br>cg13202514,cg15012625,cg05620791,cg15791108,cg26746674,cg14010619,<br>cg26543139,cg18548797,cg20712925,cg15014811,cg07649586,cg03859282,<br>cg08089041,cg13648157,cg11718780,cg02352401,cg16412228,cg05227844,<br>cg08996709,cg05745461,cg00177657,cg25369184,cg11648383,cg00401234,<br>cg04948956,cg09821234,cg19631365,cg10258962,cg14623381,cg27261494,<br>cg09785516,cg01682663,cg15278390,cg23284476,cg17218309,cg06611850,<br>cg23999337,cg15691099,cg11741432,cg10396491,cg04310180,cg06728577,<br>cg01405879,cg11333454,cg17964939,cg25962639,cg05445006,cg11340993,<br>cg16462528,cg15219878,cg13387071,cg10024100,cg02289322,cg07627664,<br>cg24940096,cg07722333,cg13242999,cg16068495,cg09817503,cg02537106,<br>cg12327691,cg25190151,cg05580667,cg04345766,cg17854641,cg06131149,<br>cg15082435,cg17219828,cg04993019,cg00551088,cg04019954,cg19689672,<br>cg04377724,cg21367769,cg25492985,cg18101917,cg04299495,cg11734019,<br>cg08898622,cg26504886,cg08515779,cg00281153,cg21330088,cg10701847,<br>cg21877281,cg12579612,cg14618411,cg03664391,cg09540002,cg26831184,<br>cg08938061,cg14699376,cg18116450,cg17983053,cg23095043,cg08376051,<br>cg18947305,cg04006206,cg10518593,cg20073451,cg04331511,cg12633766, |

| Intersections | No. of overlapping DMPs | List of overlapping DMPs                                                                                                                                                                                                                                                                                                                                                                                                                                                                                                                                                                                                                                                                                                                                                                                                                                                                                                                                                                                                                                                                                                                                                                                                                                                                                                                                                                                                                                                                                                                                                                                                                                                                                                                                                                                                                                                                                                                                                                                                                                                                                                                                                                                                                                                                                                                                                                                                                                                                                                                                                                                                                                                                                                                                                                                                                                                                                                                                                                                                                                                                                                                                                                             |
|---------------|-------------------------|------------------------------------------------------------------------------------------------------------------------------------------------------------------------------------------------------------------------------------------------------------------------------------------------------------------------------------------------------------------------------------------------------------------------------------------------------------------------------------------------------------------------------------------------------------------------------------------------------------------------------------------------------------------------------------------------------------------------------------------------------------------------------------------------------------------------------------------------------------------------------------------------------------------------------------------------------------------------------------------------------------------------------------------------------------------------------------------------------------------------------------------------------------------------------------------------------------------------------------------------------------------------------------------------------------------------------------------------------------------------------------------------------------------------------------------------------------------------------------------------------------------------------------------------------------------------------------------------------------------------------------------------------------------------------------------------------------------------------------------------------------------------------------------------------------------------------------------------------------------------------------------------------------------------------------------------------------------------------------------------------------------------------------------------------------------------------------------------------------------------------------------------------------------------------------------------------------------------------------------------------------------------------------------------------------------------------------------------------------------------------------------------------------------------------------------------------------------------------------------------------------------------------------------------------------------------------------------------------------------------------------------------------------------------------------------------------------------------------------------------------------------------------------------------------------------------------------------------------------------------------------------------------------------------------------------------------------------------------------------------------------------------------------------------------------------------------------------------------------------------------------------------------------------------------------------------------|
|               |                         | cg14246190,cg18761446,cg22730675,cg12343338,cg09571097,cg27416283,<br>cg08377615,cg14559733,cg07940971,cg22792674,cg23996893,cg12767937,<br>cg08571764,cg15052277,cg25431479,cg00795885,cg06837552,cg10658703,<br>cg20803931,cg01025954,cg16696781,cg27400353,cg12809883,cg02552466,<br>cg18499919,cg13476464,cg05507145,cg24674674,cg09610792,cg20381182,<br>cg25204360,cg21600781,cg12400807,cg25992775,cg05908149,cg05533233,<br>cg13201187,cg12603650,cg12668953,cg13386215,cg18016759,cg16501628,<br>cg14829660,cg01158161,cg27317524,cg02039956,cg04720825,cg01406061,<br>cg00026075,cg17491656,cg11444684,cg08593037,cg18645906,cg04403850,<br>cg17209231,cg08338237,cg11252050,cg19478079,cg13151527,cg16413327,<br>cg19782158,cg01764438,cg12874388,cg27370248,cg22502179,cg16181638,<br>cg25083596,cg21350892,cg11505238,cg26728141,cg25739700,cg08705882,<br>cg03047053,cg12049322,cg12351749,cg25116020,cg27530136,cg26242772,<br>cg27073142,cg11137761,cg26089220,cg16255307,cg20693190,cg15565180,<br>cg05511921,cg21203984,cg05919975,cg23874587,cg04173523,cg19822502,<br>cg00339657,cg25372607,cg05575220,cg07005246,cg05875121,cg22082216,<br>cg07336442,cg25319570,cg25501748,cg04577395,cg04751736,cg10624161,<br>cg02571470,cg20140908,cg00373114,cg06412759,cg11724472,cg14644008,<br>cg26174329,cg22979615,cg06089829,cg08862181,cg02885021,cg03808674,<br>cg17391339,cg21243154,cg27000795,cg00077606,cg24379995,cg18118503,<br>cg00779551,cg00943060,cg20010076,cg18494563,cg13060607,cg23707478,<br>cg07246946,cg22156600,cg09860935,cg00309402,cg14014369,cg04100169,<br>cg06798661,cg00042254,cg24817345,cg11553596,cg21170007,cg26646397,<br>cg08700194,cg18193764,cg22380849,cg18565809,cg05835241,cg05083325,<br>cg22677498,cg00965991,cg23225193,cg18414429,cg26855234,cg00354549,<br>cg02849894,cg10015175,cg08931376,cg23267554,cg13754687,cg25940501,<br>cg24493925,cg01937395,cg14929153,cg08657886,cg11140287,cg14011387,<br>cg26725813,cg06265811,cg08904194,cg09322386,cg19865412,cg08275454,<br>cg09788029,cg08224051,cg02921920,cg22241777,cg10096579,cg06828282,<br>cg27180368,cg05360806,cg04653337,cg05365199,cg24980765,cg03885144,<br>cg23184087,cg04181401,cg17585181,cg03701884,cg12367274,cg16306219,<br>cg24064360,cg06069685,cg20158159,cg13231384,cg07127103,cg06819431,<br>cg17426237,cg00204262,cg01305547,cg09232906,cg06245711,cg00091552,<br>cg23611097,cg04975778,cg27259633,cg19970325,cg05024143,cg01711986,<br>cg09456065,cg05897615,cg04478430,cg01555458,cg07831164,cg08276455,<br>cg15297235,cg03061237,cg13705828,cg13462829,cg14299696,cg02709100,<br>cg13443843,cg12101256,cg07780735,cg25793628,cg13951190,cg00019838,<br>cg02635468,cg21594343,cg25646128,cg05962793,cg11114487,cg14445171,<br>cg27352712,cg15569228,cg21274067,cg00130528,cg06380553,cg22573179,<br>cg01399379,cg23212786,cg04819691,cg20505486,cg10706649,cg17825185,<br>cg20107201,cg07146383,cg04943636,cg25519942,cg13412154,cg04556349,<br>cg06279274,cg02798874,cg00077299,cg18450810,cg17167159,cg07679834,<br>cg09526343,cg20153160,cg03463303,cg14528756,cg23096305,cg19716125,<br>cg10337331,cg22222413,cg14239359,cg09795091,cg07568314,cg00039070, |

| Intersections | No. of overlapping DMPs | List of overlapping DMPs                                                                                                                                                                                                                                                                                                                                                                                                                                                                                                                                                                                                                                                                                                                                                                                                                                                                                                                                                                                                                                                                                                                                                                                                                                                                                                                                                                                                                                                                                                                                                                                                                                                                                                                                                                                                                                                                                                                                                                                                                                                                                                                                                                                                                                                                                                                                                                                                                                                                                                                                                                                                                                                                                                                                                                                                                                                                                                                                                                                                                                                                                                                                                                             |
|---------------|-------------------------|------------------------------------------------------------------------------------------------------------------------------------------------------------------------------------------------------------------------------------------------------------------------------------------------------------------------------------------------------------------------------------------------------------------------------------------------------------------------------------------------------------------------------------------------------------------------------------------------------------------------------------------------------------------------------------------------------------------------------------------------------------------------------------------------------------------------------------------------------------------------------------------------------------------------------------------------------------------------------------------------------------------------------------------------------------------------------------------------------------------------------------------------------------------------------------------------------------------------------------------------------------------------------------------------------------------------------------------------------------------------------------------------------------------------------------------------------------------------------------------------------------------------------------------------------------------------------------------------------------------------------------------------------------------------------------------------------------------------------------------------------------------------------------------------------------------------------------------------------------------------------------------------------------------------------------------------------------------------------------------------------------------------------------------------------------------------------------------------------------------------------------------------------------------------------------------------------------------------------------------------------------------------------------------------------------------------------------------------------------------------------------------------------------------------------------------------------------------------------------------------------------------------------------------------------------------------------------------------------------------------------------------------------------------------------------------------------------------------------------------------------------------------------------------------------------------------------------------------------------------------------------------------------------------------------------------------------------------------------------------------------------------------------------------------------------------------------------------------------------------------------------------------------------------------------------------------------|
|               |                         | cg15447238,cg00432369,cg26321198,cg02025988,cg19166242,cg25450321,<br>cg25326378,cg16991671,cg06991713,cg22040728,cg21545673,cg02095553,<br>cg19419389,cg10946404,cg02741291,cg13382840,cg12380458,cg18599533,<br>cg06829695,cg12048339,cg23967474,cg22925943,cg08124330,cg08458378,<br>cg26946223,cg12523675,cg06957003,cg06695264,cg27213231,cg05777672,<br>cg27548568,cg02814641,cg10994819,cg11635182,cg03627891,cg08575682,<br>cg07792006,cg26053872,cg19773249,cg02256315,cg12225045,cg21111301,<br>cg05302100,cg12770425,cg16773294,cg10356341,cg15464645,cg13781121,<br>cg09690561,cg04140153,cg05895868,cg08248134,cg22350859,cg03216991,<br>cg20489289,cg25443137,cg08111714,cg04941236,cg04965879,cg09012726,<br>cg25114299,cg24935031,cg22009052,cg16500097,cg23793961,cg15328758,<br>cg07675262,cg24078554,cg13937446,cg17418407,cg27646075,cg19502207,<br>cg27133230,cg13435833,cg04947850,cg00414485,cg24601011,cg27501362,<br>cg17843101,cg02113605,cg02698622,cg11882601,cg15874144,cg10832417,<br>cg07967498,cg10090058,cg02548198,cg13754621,cg05445090,cg24933856,<br>cg23933179,cg02671915,cg01774400,cg24523650,cg09655329,cg01006648,<br>cg19548524,cg12649695,cg18935014,cg10256349,cg22622505,cg04942380,<br>cg12478793,cg27638428,cg12798675,cg10795119,cg19425807,cg14292424,<br>cg15550930,cg05949877,cg22591006,cg02210621,cg16117781,cg23574899,<br>cg16984019,cg17731710,cg24630373,cg06069324,cg12837524,cg06910977,<br>cg09382092,cg27407390,cg21949229,cg03653845,cg13800700,cg21610957,<br>cg23279878,cg08106708,cg09344229,cg16098957,cg17365377,cg14594485,<br>cg21538631,cg13361488,cg01200893,cg14188111,cg24808545,cg14942793,<br>cg11658986,cg25340121,cg10135817,cg12977827,cg05040338,cg22883353,<br>cg06471744,cg09581848,cg03128219,cg14841419,cg14543104,cg26437306,<br>cg11322936,cg17146997,cg09770075,cg17518348,cg26208764,cg24664308,<br>cg11503487,cg03938800,cg10493018,cg27530298,cg18987284,cg14563732,<br>cg23144143,cg00770471,cg08700667,cg25450372,cg19938922,cg03687707,<br>cg07442476,cg19476918,cg21648425,cg03325085,cg16105080,cg07193389,<br>cg08244656,cg17006443,cg11022060,cg22540162,cg14015851,cg06055730,<br>cg05819221,cg05013825,cg14736248,cg00459589,cg03994248,cg04767522,<br>cg06590119,cg09232154,cg10308193,cg18414979,cg21196708,cg04329429,<br>cg03059575,cg21908038,cg25866738,cg11973167,cg25505109,cg00589791,<br>cg05295028,cg10984490,cg05224642,cg15288310,cg15189233,cg06582708,<br>cg18834652,cg17367457,cg17136038,cg26423693,cg05241619,cg01877700,<br>cg18579752,cg11153596,cg22968863,cg02266539,cg16396441,cg23685037,<br>cg08497894,cg21544075,cg03718620,cg17510601,cg11553667,cg24165107,<br>cg10173749,cg04180473,cg14921275,cg15172011,cg17548932,cg09081517,<br>cg04509238,cg03646297,cg15055062,cg15381433,cg03980035,cg18365806,<br>cg24923365,cg19071460,cg10167756,cg05655647,cg06795980,cg22021768,<br>cg18054654,cg17158584,cg15107887,cg22076764,cg15354877,cg02955100,<br>cg25077271,cg08289189,cg06100373,cg16596250,cg02936043,cg27394814,<br>cg26832154,cg17578638,cg00775777,cg22877331,cg14373718,cg12301921,<br>cg25567280,cg06460350,cg10992704,cg05945844,cg00846218,cg06455125, |

| Intersections | No. of overlapping DMPs | List of overlapping DMPs                                                                                                                                                                                                                                                                                                                                                                                                                                                                                                                                                                                                                                                                                                                                                                                                                                                                                                                                                                                                                                                                                                                                                                                                                                                                                                                                                                                                                                                                                                                                                                                                                                                                                                                                                                                                                                                                                                                                                                                                                                                                                                                                                                                                                                                                                                                                                                                                                                                                                                                                                                                                                                                                                                                                                                                                                                                                                                                                                                                                                                                                                                                                                                             |
|---------------|-------------------------|------------------------------------------------------------------------------------------------------------------------------------------------------------------------------------------------------------------------------------------------------------------------------------------------------------------------------------------------------------------------------------------------------------------------------------------------------------------------------------------------------------------------------------------------------------------------------------------------------------------------------------------------------------------------------------------------------------------------------------------------------------------------------------------------------------------------------------------------------------------------------------------------------------------------------------------------------------------------------------------------------------------------------------------------------------------------------------------------------------------------------------------------------------------------------------------------------------------------------------------------------------------------------------------------------------------------------------------------------------------------------------------------------------------------------------------------------------------------------------------------------------------------------------------------------------------------------------------------------------------------------------------------------------------------------------------------------------------------------------------------------------------------------------------------------------------------------------------------------------------------------------------------------------------------------------------------------------------------------------------------------------------------------------------------------------------------------------------------------------------------------------------------------------------------------------------------------------------------------------------------------------------------------------------------------------------------------------------------------------------------------------------------------------------------------------------------------------------------------------------------------------------------------------------------------------------------------------------------------------------------------------------------------------------------------------------------------------------------------------------------------------------------------------------------------------------------------------------------------------------------------------------------------------------------------------------------------------------------------------------------------------------------------------------------------------------------------------------------------------------------------------------------------------------------------------------------------|
|               |                         | cg20947553,cg11069461,cg01172235,cg20149922,cg05694825,cg08822635,<br>cg10351418,cg04773376,cg02789915,cg26461449,cg04707327,cg17429234,<br>cg12209160,cg15358035,cg02754643,cg20150189,cg20194814,cg11753004,<br>cg11282100,cg15167836,cg01100030,cg27098587,cg17299451,cg03510444,<br>cg20428196,cg25824592,cg01691522,cg06466360,cg27241677,cg10682833,<br>cg04974940,cg27000687,cg02370040,cg12057368,cg00554165,cg26786687,<br>cg01882222,cg22752345,cg27129076,cg27623867,cg05696056,cg09783493,<br>cg25961221,cg04221836,cg07609108,cg09851981,cg27332018,cg13263013,<br>cg07159131,cg03455828,cg13997640,cg24212302,cg22889322,cg11395890,<br>cg07757545,cg22937571,cg22849967,cg04770593,cg11501364,cg17900273,<br>cg02433406,cg04237127,cg12710220,cg07510510,cg01813672,cg07887012,<br>cg12536921,cg17722656,cg17132591,cg05271080,cg02664328,cg06084702,<br>cg05636830,cg13079633,cg05207611,cg06073550,cg04591308,cg05040778,<br>cg10958840,cg15849831,cg04770282,cg18452155,cg05610699,cg11429177,<br>cg08138407,cg01238140,cg06967016,cg14311690,cg07359806,cg17310354,<br>cg15554631,cg06255741,cg12453585,cg23978557,cg03204787,cg24797931,<br>cg04338834,cg11523381,cg04696881,cg09850161,cg23492413,cg17035490,<br>cg21673010,cg01868128,cg05572584,cg05625839,cg02071267,cg24327491,<br>cg13917023,cg20090429,cg21840672,cg25342481,cg14461273,cg26965819,<br>cg06942743,cg10591077,cg19841740,cg26154888,cg04995753,cg14995181,<br>cg24516912,cg14292220,cg07505515,cg14071249,cg00836097,cg07482451,<br>cg24576285,cg04993041,cg15310513,cg02080152,cg24349106,cg08485389,<br>cg09106587,cg07158881,cg15910230,cg03906073,cg04660984,cg23158658,<br>cg18082885,cg03630756,cg07476353,cg00469797,cg04036088,cg06575847,<br>cg25924827,cg10809872,cg12602291,cg06889183,cg17858098,cg13089369,<br>cg02198582,cg19847588,cg16343302,cg15849550,cg03611573,cg25386688,<br>cg22053565,cg14288953,cg01071153,cg01551350,cg07785225,cg27312255,<br>cg01966599,cg22867154,cg03421069,cg08960663,cg06098801,cg27303125,<br>cg11739512,cg05920666,cg16292912,cg16684846,cg15937191,cg19628908,<br>cg19656808,cg19949797,cg05207255,cg17860201,cg06381000,cg13107582,<br>cg03496777,cg11046579,cg03971661,cg17173442,cg17727418,cg26675620,<br>cg13534903,cg10138313,cg19812747,cg23547656,cg21158975,cg12263794,<br>cg20316715,cg13355312,cg08073874,cg19584834,cg27082426,cg08169026,<br>cg16035667,cg10120616,cg12163415,cg03374148,cg19942560,cg23373897,<br>cg07055311,cg08132525,cg23695211,cg27413230,cg16923710,cg04460007,<br>cg04414629,cg25623815,cg08547352,cg25596655,cg13655908,cg01444149,<br>cg20979307,cg05982597,cg24970360,cg27385049,cg12631085,cg05786698,<br>cg12819781,cg11849302,cg18948941,cg22656997,cg19996313,cg12581446,<br>cg07829209,cg13173369,cg12033909,cg15323066,cg14281264,cg03378998,<br>cg27075492,cg01236774,cg00389785,cg26007766,cg19497709,cg27518314,<br>cg05389374,cg01055075,cg12495591,cg02046941,cg02362718,cg17868687,<br>cg20789811,cg06543365,cg17162808,cg20250700,cg16447054,cg24730688,<br>cg17311802,cg02753990,cg08505135,cg19695166,cg21664781,cg25639848,<br>cg23851043,cg11191979,cg08154700,cg06831389,cg22984417,cg20610838, |

| Intersections | No. of overlapping DMPs | List of overlapping DMPs                                                                                                                                                                                                                                                                                                                                                                                                                                                                                                                                                                                                                                                                                                                                                                                                                                                                                                                                                                                                                                                                                                                                                                                                                                                                                                                                                                                                                                                                                                                                                                                                                                                                                                                                                                                                                                                                                                                                                                                                                                                                                                                                                                                                                                                                                                                                                                                                                                                                                                                                                                                                                                                                                                                                                                                                                                                                                                                                                                                                                                                                                                                                                                             |
|---------------|-------------------------|------------------------------------------------------------------------------------------------------------------------------------------------------------------------------------------------------------------------------------------------------------------------------------------------------------------------------------------------------------------------------------------------------------------------------------------------------------------------------------------------------------------------------------------------------------------------------------------------------------------------------------------------------------------------------------------------------------------------------------------------------------------------------------------------------------------------------------------------------------------------------------------------------------------------------------------------------------------------------------------------------------------------------------------------------------------------------------------------------------------------------------------------------------------------------------------------------------------------------------------------------------------------------------------------------------------------------------------------------------------------------------------------------------------------------------------------------------------------------------------------------------------------------------------------------------------------------------------------------------------------------------------------------------------------------------------------------------------------------------------------------------------------------------------------------------------------------------------------------------------------------------------------------------------------------------------------------------------------------------------------------------------------------------------------------------------------------------------------------------------------------------------------------------------------------------------------------------------------------------------------------------------------------------------------------------------------------------------------------------------------------------------------------------------------------------------------------------------------------------------------------------------------------------------------------------------------------------------------------------------------------------------------------------------------------------------------------------------------------------------------------------------------------------------------------------------------------------------------------------------------------------------------------------------------------------------------------------------------------------------------------------------------------------------------------------------------------------------------------------------------------------------------------------------------------------------------------|
|               |                         | cg16910047,cg06550991,cg20731623,cg03578552,cg00841768,cg02542806,<br>cg10433438,cg20460709,cg22029774,cg24027594,cg24512770,cg08441414,<br>cg16311685,cg10819807,cg02485558,cg10616902,cg17917920,cg09675993,<br>cg03031322,cg13487037,cg01235795,cg21072513,cg03673295,cg03263979,<br>cg13344470,cg10333051,cg02791765,cg16775198,cg04982874,cg03179726,<br>cg15177410,cg03242401,cg16618979,cg19628012,cg26611367,cg07369260,<br>cg19610848,cg20797552,cg26870594,cg19955257,cg09582410,cg20689224,<br>cg04792642,cg22549383,cg25744558,cg06952534,cg09806966,cg22139983,<br>cg15236453,cg17794241,cg13990958,cg08506445,cg24131397,cg26241746,<br>cg17944001,cg18695750,cg19816059,cg00864563,cg11553654,cg23303070,<br>cg08458655,cg04547433,cg08161136,cg03195665,cg00593414,cg03185283,<br>cg11658588,cg25418870,cg27548735,cg24994648,cg13359037,cg10911328,<br>cg17002428,cg04197935,cg25533594,cg07035001,cg08152567,cg05233550,<br>cg22636056,cg23842331,cg24499677,cg15045771,cg08869857,cg08676001,<br>cg18412326,cg20357807,cg25306357,cg22129059,cg03731358,cg18971492,<br>cg07221511,cg01125327,cg02058944,cg12858231,cg21253881,cg25312546,<br>cg18291151,cg27308967,cg12941675,cg04174710,cg01405685,cg17881380,<br>cg07242196,cg08814020,cg22335802,cg18474718,cg14179383,cg13291666,<br>cg03319082,cg23636571,cg27192892,cg02898904,cg17932974,cg05653753,<br>cg06453853,cg25926652,cg26155739,cg11928962,cg13551229,cg10011963,<br>cg19555833,cg18286995,cg26322995,cg19664425,cg14438634,cg04881008,<br>cg00776252,cg07799639,cg19086488,cg09144905,cg08996975,cg15844527,<br>cg24958423,cg06311795,cg04830191,cg04759112,cg23985930,cg08795994,<br>cg23416909,cg24509237,cg05790237,cg13757172,cg15442567,cg03461361,<br>cg21963218,cg04521279,cg04917208,cg01206398,cg21682210,cg20802214,<br>cg19656799,cg18281090,cg22205607,cg10245488,cg21670828,cg23935361,<br>cg13807341,cg05858115,cg00054572,cg00395929,cg13482378,cg03493513,<br>cg26890309,cg06082228,cg12309550,cg18155344,cg01641468,cg18013249,<br>cg06712763,cg11152223,cg11156733,cg14558153,cg06816421,cg03361504,<br>cg12280796,cg23481184,cg02563407,cg26569349,cg23826579,cg20602914,<br>cg05285768,cg03119599,cg22416672,cg18411194,cg24524735,cg14522790,<br>cg24466100,cg02621779,cg27467249,cg06659282,cg06538888,cg18755544,<br>cg26299763,cg19147499,cg20383654,cg24434232,cg16778451,cg02091607,<br>cg09854814,cg10817408,cg22075974,cg12884510,cg17001032,cg23538344,<br>cg00114618,cg21898708,cg11243251,cg18826743,cg14929317,cg26131114,<br>cg22826803,cg22963191,cg14433609,cg04260057,cg18530840,cg09808196,<br>cg13167465,cg22149095,cg00263314,cg04258934,cg27379587,cg14170835,<br>cg16453673,cg24916055,cg18345539,cg19445642,cg03535648,cg14545914,<br>cg22732549,cg05063097,cg03189593,cg15085842,cg12286804,cg13703095,<br>cg21425723,cg09388113,cg12139156,cg07518353,cg23151747,cg19165344,<br>cg23812013,cg02173969,cg07010337,cg04202122,cg07763398,cg08363518,<br>cg20502257,cg24819427,cg17978425,cg25214823,cg25492458,cg21619881,<br>cg02643580,cg24807354,cg09552983,cg25582105,cg18946932,cg16553051,<br>cg06364539,cg02007235,cg06407259,cg04317573,cg26365152,cg26511326, |



| Intersections | No. of overlapping DMPs | List of overlapping DMPs                                                                                                                                                                                                                                                                                                                                                                                                                                                                                                                                                                                                                                                                                                                                                                                                                                                                                                                                                                                                                                                                                                                                                                                                                                                                                                                                                                                                                                                                                                                                                                                                                                                                                                                                                                                                                                                                                                                                                                                                                                                                                                                                                                                                                                                                                                                                                                                                                                                                                                                                                                                                                                                                                                                                                                                                                                                                                                                                                                                                                                                                                                                                                                             |
|---------------|-------------------------|------------------------------------------------------------------------------------------------------------------------------------------------------------------------------------------------------------------------------------------------------------------------------------------------------------------------------------------------------------------------------------------------------------------------------------------------------------------------------------------------------------------------------------------------------------------------------------------------------------------------------------------------------------------------------------------------------------------------------------------------------------------------------------------------------------------------------------------------------------------------------------------------------------------------------------------------------------------------------------------------------------------------------------------------------------------------------------------------------------------------------------------------------------------------------------------------------------------------------------------------------------------------------------------------------------------------------------------------------------------------------------------------------------------------------------------------------------------------------------------------------------------------------------------------------------------------------------------------------------------------------------------------------------------------------------------------------------------------------------------------------------------------------------------------------------------------------------------------------------------------------------------------------------------------------------------------------------------------------------------------------------------------------------------------------------------------------------------------------------------------------------------------------------------------------------------------------------------------------------------------------------------------------------------------------------------------------------------------------------------------------------------------------------------------------------------------------------------------------------------------------------------------------------------------------------------------------------------------------------------------------------------------------------------------------------------------------------------------------------------------------------------------------------------------------------------------------------------------------------------------------------------------------------------------------------------------------------------------------------------------------------------------------------------------------------------------------------------------------------------------------------------------------------------------------------------------------|
|               |                         | cg21212977,cg01776221,cg23833195,cg04383038,cg07360201,cg02399275,<br>cg01438537,cg17643729,cg17781357,cg20251199,cg25400753,cg07814816,<br>cg14317321,cg24766109,cg07378405,cg08302468,cg15025569,cg02634745,<br>cg12482983,cg09601319,cg25106036,cg08079970,cg21006422,cg07613952,<br>cg17767957,cg04427512,cg16292030,cg20708199,cg13331741,cg05843946,<br>cg12075776,cg07733129,cg18918365,cg22406758,cg21214969,cg22269416,<br>cg08282043,cg01554257,cg14917136,cg02786257,cg23117565,cg08262598,<br>cg23794200,cg17906245,cg26131292,cg27541349,cg09597666,cg16166262,<br>cg02083151,cg27610521,cg21295398,cg01446270,cg14529610,cg23432249,<br>cg25742745,cg18606993,cg22907589,cg25265769,cg18582979,cg03972219,<br>cg14642381,cg24027542,cg07029201,cg24996280,cg22241014,cg10103235,<br>cg06336578,cg04772797,cg00711386,cg07962218,cg08804555,cg16103996,<br>cg06681324,cg25477839,cg11389953,cg05739305,cg14575222,cg09800974,<br>cg06662976,cg23876355,cg17207090,cg07589034,cg08842388,cg24938659,<br>cg26134629,cg18048655,cg00422716,cg03798162,cg00674003,cg04415672,<br>cg24436207,cg23911661,cg07252933,cg10595421,cg02278087,cg19765038,<br>cg00336555,cg21504005,cg15624335,cg15789385,cg00026346,cg19733514,<br>cg26240939,cg09373254,cg11062167,cg16003857,cg06485995,cg04362315,<br>cg19875936,cg05139219,cg02605708,cg03820779,cg19887341,cg23528492,<br>cg00200667,cg21048411,cg13728650,cg20960953,cg27054055,cg08773876,<br>cg13582500,cg02864626,cg12399860,cg12749280,cg27233071,cg13557160,<br>cg13051865,cg15612847,cg03039137,cg07021678,cg22853813,cg01952473,<br>cg20604957,cg12768447,cg02397061,cg09554099,cg13300509,cg00491469,<br>cg26682641,cg23521138,cg04904531,cg20182709,cg18395233,cg26894484,<br>cg26497076,cg11985745,cg25463779,cg20672131,cg22152082,cg17447300,<br>cg01665970,cg21192260,cg00877619,cg04989533,cg08439328,cg15646967,<br>cg07499201,cg01729288,cg20919914,cg09407223,cg24576666,cg10166160,<br>cg01503773,cg26074575,cg09314196,cg03214637,cg07752079,cg07437235,<br>cg06407709,cg11159299,cg08284985,cg04011354,cg07437737,cg05837491,<br>cg22009239,cg02926601,cg03680769,cg08786064,cg12683742,cg08082943,<br>cg26587014,cg00593446,cg14223709,cg03694517,cg15541890,cg26212701,<br>cg26974427,cg27271242,cg10023469,cg16868500,cg18241486,cg11920576,<br>cg06552046,cg19507893,cg16949584,cg00244317,cg08815352,cg14076860,<br>cg03805782,cg04311699,cg16760971,cg19811786,cg09032303,cg01770076,<br>cg15830449,cg09974839,cg00591225,cg24140200,cg11132411,cg10936233,<br>cg00201595,cg21106661,cg24849108,cg13449831,cg04884171,cg15988897,<br>cg26232655,cg17676119,cg27085560,cg07743747,cg25423732,cg11100216,<br>cg27471183,cg27657326,cg19033271,cg15747531,cg10736955,cg17056317,<br>cg13986498,cg13357330,cg12470218,cg07757454,cg07426622,cg13788387,<br>cg22892485,cg24291991,cg00137745,cg00373376,cg25144109,cg19541260,<br>cg10131227,cg10510779,cg22298470,cg16215362,cg04072337,cg19721541,<br>cg02024219,cg21664212,cg26832183,cg14252850,cg06651838,cg07637658,<br>cg16875108,cg14694085,cg22843395,cg21812670,cg13507091,cg19732625,<br>cg16733589,cg07498239,cg24544275,cg17526060,cg16562054,cg11798814, |

| Intersections | No. of overlapping DMPs | List of overlapping DMPs                                                                                                                                                                                                                                                                                                                                                                                                                                                                                                                                                                                                                                                                                                                                                                                                                                                                                                                                                                                                                                                                                                                                                                                                                                                                                                                                                                                                                                                                                                                                                                                                                                                                                                                                                                                                                                                                                                                                                                                                                                                                                                                                                                                                                                                                                                                                                                                                                                                                                                                                                                                                                                                                                                                                                                                                                                                                                                                                                                                                                                                                                                                                                                             |
|---------------|-------------------------|------------------------------------------------------------------------------------------------------------------------------------------------------------------------------------------------------------------------------------------------------------------------------------------------------------------------------------------------------------------------------------------------------------------------------------------------------------------------------------------------------------------------------------------------------------------------------------------------------------------------------------------------------------------------------------------------------------------------------------------------------------------------------------------------------------------------------------------------------------------------------------------------------------------------------------------------------------------------------------------------------------------------------------------------------------------------------------------------------------------------------------------------------------------------------------------------------------------------------------------------------------------------------------------------------------------------------------------------------------------------------------------------------------------------------------------------------------------------------------------------------------------------------------------------------------------------------------------------------------------------------------------------------------------------------------------------------------------------------------------------------------------------------------------------------------------------------------------------------------------------------------------------------------------------------------------------------------------------------------------------------------------------------------------------------------------------------------------------------------------------------------------------------------------------------------------------------------------------------------------------------------------------------------------------------------------------------------------------------------------------------------------------------------------------------------------------------------------------------------------------------------------------------------------------------------------------------------------------------------------------------------------------------------------------------------------------------------------------------------------------------------------------------------------------------------------------------------------------------------------------------------------------------------------------------------------------------------------------------------------------------------------------------------------------------------------------------------------------------------------------------------------------------------------------------------------------------|
|               |                         | cg01624081,cg15712821,cg27113736,cg25673945,cg05251479,cg26808852,<br>cg19751869,cg23101686,cg21752889,cg10715333,cg00661205,cg13436725,<br>cg17661103,cg08997913,cg06995299,cg10124011,cg07512790,cg21433538,<br>cg05336067,cg00795247,cg00771653,cg09614350,cg02955037,cg05381183,<br>cg14505667,cg03014969,cg01406909,cg11002558,cg05424526,cg03760158,<br>cg19366381,cg09463155,cg04167811,cg02629093,cg22443651,cg03987813,<br>cg16486754,cg16494108,cg02833379,cg24014141,cg04981665,cg18380211,<br>cg04280377,cg18098053,cg00993710,cg11508081,cg26011210,cg14112555,<br>cg05259332,cg19629216,cg06087932,cg01374654,cg05882673,cg18920489,<br>cg00507855,cg23199403,cg17046348,cg06803290,cg12807855,cg22017654,<br>cg07669814,cg07724487,cg26479971,cg23035238,cg06308323,cg24094412,<br>cg17340810,cg25542337,cg11623932,cg24033957,cg01124868,cg01013685,<br>cg24162579,cg05739419,cg17686973,cg16615900,cg14106242,cg01492146,<br>cg21077030,cg01843766,cg04244183,cg06868413,cg00090612,cg14089603,<br>cg24003649,cg02512224,cg08107352,cg03778373,cg08499057,cg21564514,<br>cg23190402,cg14048785,cg08629097,cg04252529,cg22328929,cg24813180,<br>cg03984344,cg03398966,cg15844647,cg25139877,cg04030146,cg25020232,<br>cg24157008,cg24516399,cg02838309,cg14701925,cg22395811,cg19370278,<br>cg12163646,cg15718106,cg12543807,cg08864829,cg23835338,cg06034437,<br>cg01379680,cg11689744,cg06620605,cg22166248,cg19405941,cg12039660,<br>cg13663667,cg14615959,cg21931174,cg21343859,cg24684576,cg04648500,<br>cg11949533,cg14755054,cg04791421,cg10828900,cg15683356,cg03490448,<br>cg09307250,cg27380412,cg13560204,cg03833993,cg21782357,cg23516537,<br>cg18143116,cg23919678,cg07703679,cg11555339,cg19863964,cg08998414,<br>cg25593022,cg06785359,cg02245418,cg19440553,cg07441476,cg01938295,<br>cg02668655,cg09409500,cg20568659,cg07611351,cg14239588,cg19500057,<br>cg25882056,cg08609477,cg07990036,cg21186771,cg05568311,cg25743531,<br>cg08565320,cg06882504,cg03446694,cg19397969,cg15058852,cg05476521,<br>cg22104394,cg04057161,cg11065418,cg10768614,cg05451078,cg27338653,<br>cg08739385,cg00360840,cg04114537,cg14222000,cg13491023,cg06543160,<br>cg01180835,cg20768515,cg02432263,cg27604200,cg00694660,cg24834165,<br>cg17165818,cg14390764,cg07989373,cg14330517,cg03805357,cg06658821,<br>cg10163580,cg17651095,cg17823376,cg20027331,cg19786648,cg13973939,<br>cg07573797,cg24152718,cg03155233,cg10456628,cg19297164,cg24663131,<br>cg14189381,cg16709217,cg21950208,cg20662420,cg18565899,cg18140324,<br>cg22216431,cg01693326,cg24688425,cg14832223,cg11859176,cg20328379,<br>cg08464855,cg25094834,cg14233513,cg04860622,cg09510269,cg04847386,<br>cg07856421,cg16673286,cg09759808,cg11813940,cg19910022,cg13482911,<br>cg05231098,cg08919528,cg26124514,cg24581736,cg24755266,cg08826384,<br>cg00590383,cg12098896,cg13617603,cg27500542,cg18599231,cg01521143,<br>cg09274104,cg10340872,cg07708653,cg17182202,cg19851416,cg18412394,<br>cg16527939,cg05198670,cg01324000,cg16017492,cg01590359,cg07476792,<br>cg04581073,cg02114341,cg16500769,cg03953086,cg01450736,cg04850842,<br>cg03077730,cg15066656,cg00502963,cg18367027,cg04677581,cg04240603, |

| Intersections | No. of overlapping DMPs | List of overlapping DMPs                                                                                                                                                                                                                                                                                                                                                                                                                                                                                                                                                                                                                                                                                                                                                                                                                                                                                                                                                                                                                                                                                                                                                                                                                                                                                                                                                                                                                                                                                                                                                                                                                                                                                                                                                                                                                                                                                                                                                                                                                                                                                                                                                                                                                                                                                                                                                                                                                                                                                                                                                           |
|---------------|-------------------------|------------------------------------------------------------------------------------------------------------------------------------------------------------------------------------------------------------------------------------------------------------------------------------------------------------------------------------------------------------------------------------------------------------------------------------------------------------------------------------------------------------------------------------------------------------------------------------------------------------------------------------------------------------------------------------------------------------------------------------------------------------------------------------------------------------------------------------------------------------------------------------------------------------------------------------------------------------------------------------------------------------------------------------------------------------------------------------------------------------------------------------------------------------------------------------------------------------------------------------------------------------------------------------------------------------------------------------------------------------------------------------------------------------------------------------------------------------------------------------------------------------------------------------------------------------------------------------------------------------------------------------------------------------------------------------------------------------------------------------------------------------------------------------------------------------------------------------------------------------------------------------------------------------------------------------------------------------------------------------------------------------------------------------------------------------------------------------------------------------------------------------------------------------------------------------------------------------------------------------------------------------------------------------------------------------------------------------------------------------------------------------------------------------------------------------------------------------------------------------------------------------------------------------------------------------------------------------|
|               |                         | cg16184346,cg18877514,cg02042467,cg00447557,cg16067453,cg24974704,<br>cg13628100,cg05117124,cg26191710,cg13965201,cg15893396,cg18906478,<br>cg27043531,cg21005240,cg11512797,cg15861059,cg25401219,cg06377069,<br>cg03500611,cg19639071,cg02496113,cg05781820,cg15764655,cg18718349,<br>cg15703165,cg05407135,cg00927227,cg08441455,cg01977520,cg10891008,<br>cg12581891,cg22795059,cg20386784,cg04342863,cg16669468,cg09123455,<br>cg22797978,cg13553897,cg15615365,cg13665979,cg10800519,cg00754836,<br>cg04074650,cg13489424,cg26554494,cg27422721,cg03269320,cg14805174,<br>cg04260065,cg24446166,cg09200760,cg09303484,cg18331135,cg22533480,<br>cg27168606,cg01025185,cg18190417,cg23550034,cg00415939,cg16400196,<br>cg08977027,cg10683565,cg07327335,cg06879534,cg21279353,cg08488494,<br>cg21140633,cg18623351,cg16789902,cg18601334,cg15597147,cg15076179,<br>cg20713712,cg12549595,cg18454218,cg17440757,cg00081046,cg08550689,<br>cg03318222,cg21126306,cg11648402,cg01855601,cg19852607,cg21447989,<br>cg10531521,cg22992730,cg17240885,cg02193513,cg11402099,cg18646208,<br>cg17260058,cg18172802,cg03966669,cg05935660,cg14573897,cg06504624,<br>cg01799186,cg05222807,cg21430959,cg16336227,cg04605316,cg06761437,<br>cg14013161,cg08882503,cg12743556,cg15572423,cg22529427,cg10725048,<br>cg20494682,cg14243616,cg22495211,cg02817770,cg04191142,cg19791907,<br>cg26735886,cg23726945,cg23961141,cg03319070,cg02725493,cg14232165,<br>cg05041475,cg04749197,cg01091239,cg05519080,cg24250234,cg25921194,<br>cg17467517,cg25046866,cg09173378,cg13660596,cg27462497,cg18188326,<br>cg10778931,cg10430021,cg03615063,cg14597822,cg01048203,cg11615495,<br>cg15842559,cg24855045,cg08163621,cg13726504,cg21645075,cg21610554,<br>cg06650698,cg08522655,cg27180636,cg26588398,cg14939641,cg18646671,<br>cg13569714,cg21460946,cg03293095,cg01681290,cg19254426,cg24158437,<br>cg05616608,cg16027728,cg26654766,cg17886662,cg10646179,cg17521526,<br>cg16311808,cg13189097,cg17442548,cg26309261,cg09791009,cg03511766,<br>cg10003974,cg02574374,cg11675271,cg20458807,cg15932610,cg24320065,<br>cg26424817,cg12103802,cg06309053,cg08715988,cg27105890,cg04319742,<br>cg06293195,cg05873359,cg02964602,cg20919336,cg12845900,cg10414477,<br>cg23686321,cg23994714,cg01026613,cg01488306,cg06944489,cg12866769,<br>cg09131512,cg03665229,cg19771031,cg03525847,cg10798225,cg19648192,<br>cg19046642,cg02874396,cg15443166,cg09548799,cg03840912,cg19677184,<br>cg26609894,cg23839398,cg01063509,cg23308914,cg13717555,cg20029324,<br>cg05745622,cg26496604,cg10210086 |
|               |                         | cg00010242,cg04917688,cg12210527,cg02255104,cg25764935,cg15815117,<br>cg07729230,cg06874985,cg03880785,cg19661819,cg01853974,cg03983715,<br>cg19690486,cg18358845,cg09882550,cg12882999,cg26679144,cg18285636,<br>cg04482148,cg24209994,cg14000815,cg02348347,cg16114141,cg02050613,<br>cg04906603,cg01976076,cg03643116,cg11678206,cg06733294,cg09570676,<br>cg03987573,cg13924868,cg14218108,cg25456633,cg25616771,cg25413125,<br>cg12336935,cg26492631,cg24693463,cg07784294,cg17228560,cg02774855,                                                                                                                                                                                                                                                                                                                                                                                                                                                                                                                                                                                                                                                                                                                                                                                                                                                                                                                                                                                                                                                                                                                                                                                                                                                                                                                                                                                                                                                                                                                                                                                                                                                                                                                                                                                                                                                                                                                                                                                                                                                                             |

| Intersections | No. of overlapping DMPs | List of overlapping DMPs                                                                                                                                                                                                                                                                                                                                                                                                                                                                                                                                                                                                                                                                                                                                                                                                                                                                                                                                                                                                                                                                                                                                                                                                                                                                                                                                                                                                                                                                                                                                                                                                                                                                                                                                                                                                                                                                                                                                                                                                                                                                                                                                                                                                                                                                                                                                                                                                                                                                                                                                                                                                                                                                                                                                                                                                                                                                                                                                                                                                                                                                                                                                                                             |
|---------------|-------------------------|------------------------------------------------------------------------------------------------------------------------------------------------------------------------------------------------------------------------------------------------------------------------------------------------------------------------------------------------------------------------------------------------------------------------------------------------------------------------------------------------------------------------------------------------------------------------------------------------------------------------------------------------------------------------------------------------------------------------------------------------------------------------------------------------------------------------------------------------------------------------------------------------------------------------------------------------------------------------------------------------------------------------------------------------------------------------------------------------------------------------------------------------------------------------------------------------------------------------------------------------------------------------------------------------------------------------------------------------------------------------------------------------------------------------------------------------------------------------------------------------------------------------------------------------------------------------------------------------------------------------------------------------------------------------------------------------------------------------------------------------------------------------------------------------------------------------------------------------------------------------------------------------------------------------------------------------------------------------------------------------------------------------------------------------------------------------------------------------------------------------------------------------------------------------------------------------------------------------------------------------------------------------------------------------------------------------------------------------------------------------------------------------------------------------------------------------------------------------------------------------------------------------------------------------------------------------------------------------------------------------------------------------------------------------------------------------------------------------------------------------------------------------------------------------------------------------------------------------------------------------------------------------------------------------------------------------------------------------------------------------------------------------------------------------------------------------------------------------------------------------------------------------------------------------------------------------------|
|               |                         | cg22754489,cg24302646,cg09838857,cg20693615,cg03482617,cg14792002,<br>cg09383106,cg24841310,cg13247922,cg09279458,cg16715662,cg02289590,<br>cg10595449,cg03530962,cg13570861,cg02600413,cg23089436,cg06719602,<br>cg03656632,cg01152927,cg18849025,cg20284982,cg09470963,cg23702117,<br>cg07904879,cg04409981,cg17206564,cg03670422,cg21844726,cg18903373,<br>cg05372957,cg04719454,cg15708175,cg07186585,cg20374041,cg11064395,<br>cg22993715,cg03177729,cg14847658,cg23363484,cg17565410,cg15612221,<br>cg08780974,cg05846057,cg08491363,cg09711421,cg08577693,cg02693118,<br>cg22389215,cg07902406,cg19819089,cg06044794,cg02222496,cg08047889,<br>cg04315682,cg10318313,cg26389381,cg20177086,cg18731202,cg18528216,<br>cg07144026,cg23392359,cg12989745,cg20187320,cg19405799,cg07395611,<br>cg07811719,cg19733740,cg20164279,cg23318676,cg04098023,cg26836171,<br>cg13956645,cg23256971,cg11607882,cg16023306,cg23919830,cg03657837,<br>cg02519625,cg01837661,cg00214970,cg13073030,cg11780096,cg26579073,<br>cg20516364,cg18706881,cg04722593,cg02862516,cg10565537,cg12496800,<br>cg24908403,cg10709331,cg15162320,cg04606471,cg01858583,cg20823181,<br>cg26620724,cg09436495,cg11953399,cg02678160,cg23920445,cg14650677,<br>cg27599319,cg27350579,cg25905578,cg00402551,cg06592890,cg01695994,<br>cg27089219,cg13128596,cg27365621,cg02422011,cg06374204,cg08160317,<br>cg13346967,cg11023992,cg13010190,cg27002271,cg26389958,cg15367311,<br>cg02854763,cg06031526,cg20330521,cg10762533,cg23146699,cg13932046,<br>cg00712510,cg20677261,cg00098162,cg20414753,cg25195309,cg19930290,<br>cg16707391,cg13777488,cg04267164,cg02348876,cg08409566,cg00275090,<br>cg17799654,cg22020455,cg20776543,cg19929302,cg09474173,cg20621459,<br>cg03482534,cg19405371,cg07923588,cg03916783,cg19078226,cg14559160,<br>cg26604287,cg22553555,cg09315465,cg13571852,cg10617091,cg18826070,<br>cg27528695,cg27233997,cg18581500,cg16790423,cg23622026,cg22643259,<br>cg17170868,cg23191740,cg00046410,cg10537848,cg09408023,cg23331837,<br>cg25355465,cg20948377,cg27349129,cg21583727,cg12072724,cg04247746,<br>cg23448432,cg12106346,cg14195606,cg04080291,cg17942553,cg01553616,<br>cg21536042,cg11860760,cg13450407,cg10775350,cg20994248,cg25780806,<br>cg27570978,cg08173660,cg05305060,cg04849089,cg09938469,cg19874421,<br>cg15177169,cg17956259,cg23460070,cg27061477,cg19723678,cg07633119,<br>cg02362984,cg02905251,cg00351097,cg00150128,cg17342360,cg11068217,<br>cg22621535,cg05050047,cg11085062,cg17299799,cg06739505,cg03132727,<br>cg06379858,cg10210919,cg07332388,cg18224798,cg15574240,cg11308338,<br>cg00905858,cg05581297,cg09190827,cg02167717,cg00252057,cg09240555,<br>cg02773045,cg03237134,cg22058467,cg11834694,cg02158100,cg03898302,<br>cg23435916,cg11911454,cg08805661,cg25783153,cg04127706,cg26249038,<br>cg13947137,cg09829842,cg05555396,cg06596613,cg00948878,cg00388439,<br>cg01342196,cg16766036,cg14081995,cg18531720,cg23044169,cg26970316,<br>cg01936488,cg15684015,cg01845476,cg27147706,cg23413954,cg27314482,<br>cg22005656,cg04546061,cg21358429,cg08369061,cg18234280,cg07681834,<br>cg15934100,cg01206872,cg22525154,cg14299539,cg26532102,cg01292810, |

| Intersections | No. of overlapping DMPs | List of overlapping DMPs                                                                                                                                                                                                                                                                                                                                                                                                                                                                                                                                                                                                                                                                                                                                                                                                                                                                                                                                                                                                                                                                                                                                                                                                                                                                                                                                                                                                                                                                                                                                                                                                                                                                                                                                                                                                                                                                                                                                                                                                                                                                                                                                                                                                                                                                                                                                                                                                                                                                                                                                                                                                                                                                                                                                                                                                                                                                                                                                                                                                                                                                                                                                                                             |
|---------------|-------------------------|------------------------------------------------------------------------------------------------------------------------------------------------------------------------------------------------------------------------------------------------------------------------------------------------------------------------------------------------------------------------------------------------------------------------------------------------------------------------------------------------------------------------------------------------------------------------------------------------------------------------------------------------------------------------------------------------------------------------------------------------------------------------------------------------------------------------------------------------------------------------------------------------------------------------------------------------------------------------------------------------------------------------------------------------------------------------------------------------------------------------------------------------------------------------------------------------------------------------------------------------------------------------------------------------------------------------------------------------------------------------------------------------------------------------------------------------------------------------------------------------------------------------------------------------------------------------------------------------------------------------------------------------------------------------------------------------------------------------------------------------------------------------------------------------------------------------------------------------------------------------------------------------------------------------------------------------------------------------------------------------------------------------------------------------------------------------------------------------------------------------------------------------------------------------------------------------------------------------------------------------------------------------------------------------------------------------------------------------------------------------------------------------------------------------------------------------------------------------------------------------------------------------------------------------------------------------------------------------------------------------------------------------------------------------------------------------------------------------------------------------------------------------------------------------------------------------------------------------------------------------------------------------------------------------------------------------------------------------------------------------------------------------------------------------------------------------------------------------------------------------------------------------------------------------------------------------------|
|               |                         | cg07003739,cg19061089,cg25579656,cg26240842,cg00202819,cg02527496,<br>cg16196762,cg03644750,cg01058212,cg26124136,cg14333935,cg22275321,<br>cg01276327,cg19453726,cg19127835,cg05000860,cg18545561,cg14878302,<br>cg22847617,cg18767287,cg27322975,cg08988609,cg09734033,cg02642031,<br>cg18443741,cg23951861,cg07075118,cg02165614,cg00539325,cg12805450,<br>cg20151125,cg01566282,cg27222368,cg23413074,cg14962447,cg02771587,<br>cg17604181,cg09866659,cg14737320,cg18444254,cg11546385,cg13428239,<br>cg14202087,cg08965262,cg04707217,cg03077969,cg18683453,cg04502857,<br>cg06438301,cg13896861,cg09744732,cg11319211,cg07876320,cg15999636,<br>cg26010028,cg21821108,cg11957884,cg15195097,cg00906838,cg19497939,<br>cg23936681,cg21211664,cg13518537,cg05343106,cg16437896,cg18596139,<br>cg10448111,cg03394122,cg02807271,cg07855322,cg12798311,cg22130868,<br>cg04636881,cg23270103,cg14216348,cg04321793,cg03747030,cg13451471,<br>cg15077416,cg01834373,cg23797052,cg25939203,cg10438121,cg12193365,<br>cg27016609,cg16230999,cg01390728,cg15939182,cg20273485,cg05677184,<br>cg20150443,cg00301902,cg23557788,cg03793551,cg08598966,cg21443763,<br>cg07107196,cg18792689,cg13267821,cg23154064,cg27046079,cg17463277,<br>cg16047994,cg25212814,cg08171276,cg22375720,cg08400246,cg10675515,<br>cg09946623,cg20788083,cg08160871,cg18569952,cg13295812,cg09095792,<br>cg07672065,cg01675895,cg22339219,cg02418072,cg13827173,cg10410904,<br>cg06530991,cg01048972,cg25672097,cg00288957,cg16522960,cg20075582,<br>cg07402303,cg18345844,cg21857146,cg25990920,cg05921316,cg01522278,<br>cg25714060,cg19549314,cg13504480,cg00897276,cg06127619,cg00410323,<br>cg12298241,cg00065368,cg12738078,cg02569596,cg06401138,cg08982952,<br>cg02189283,cg14946950,cg05828992,cg12225467,cg03313815,cg01448931,<br>cg20276402,cg13731703,cg24505274,cg00498419,cg14266348,cg24676969,<br>cg25217895,cg16277405,cg15807288,cg22986077,cg13559773,cg23978473,<br>cg21527556,cg13925220,cg16095772,cg00559439,cg12007683,cg06853577,<br>cg19263575,cg23480284,cg18546110,cg02333281,cg25039993,cg10543219,<br>cg02646611,cg24374538,cg03541365,cg03117577,cg01548199,cg03751734,<br>cg02898019,cg16320398,cg17092860,cg22232708,cg06183295,cg20029156,<br>cg17242590,cg12318152,cg21690675,cg11911128,cg15263875,cg09573809,<br>cg13444243,cg10503283,cg10681811,cg26309498,cg21005459,cg23021237,<br>cg25837984,cg23811122,cg01516809,cg12786765,cg17752707,cg02276269,<br>cg10795552,cg25172808,cg20173120,cg24048209,cg22068759,cg09248887,<br>cg00395420,cg10537017,cg16503713,cg14431577,cg00458927,cg03484703,<br>cg14600600,cg03250393,cg25370836,cg07465899,cg22869283,cg22626747,<br>cg05302542,cg02887598,cg16026862,cg26795179,cg03194151,cg13589840,<br>cg02696351,cg21538860,cg22207479,cg16909293,cg00094333,cg11193840,<br>cg07372609,cg15033776,cg18205372,cg10784548,cg23691733,cg13429967,<br>cg27437526,cg02953432,cg11646018,cg16556679,cg24715709,cg15624109,<br>cg23430209,cg25605360,cg13978409,cg23236301,cg20872422,cg07839513,<br>cg02764852,cg10080250,cg26758386,cg27116232,cg27042091,cg02921604,<br>cg01128794,cg10947827,cg11940381,cg08096684,cg08846312,cg07911444, |

| Intersections | No. of overlapping DMPs | List of overlapping DMPs                                                                                                                                                                                                                                                                                                                                                                                                                                                                                                                                                                                                                                                                                                                                                                                                                                                                                                                                                                                                                                                                                                                                                                                                                                                                                                                                                                                                                                                                                                                                                                                                                                                                                                                                                                                                                                                                                                                                                                                                                                                                                                                                                                                                                                                                                                                                                                                                                                                                                                                                                                                                                                                                                                                                                                                                                                                                                                                                                                                                                                                                                                                                                                             |
|---------------|-------------------------|------------------------------------------------------------------------------------------------------------------------------------------------------------------------------------------------------------------------------------------------------------------------------------------------------------------------------------------------------------------------------------------------------------------------------------------------------------------------------------------------------------------------------------------------------------------------------------------------------------------------------------------------------------------------------------------------------------------------------------------------------------------------------------------------------------------------------------------------------------------------------------------------------------------------------------------------------------------------------------------------------------------------------------------------------------------------------------------------------------------------------------------------------------------------------------------------------------------------------------------------------------------------------------------------------------------------------------------------------------------------------------------------------------------------------------------------------------------------------------------------------------------------------------------------------------------------------------------------------------------------------------------------------------------------------------------------------------------------------------------------------------------------------------------------------------------------------------------------------------------------------------------------------------------------------------------------------------------------------------------------------------------------------------------------------------------------------------------------------------------------------------------------------------------------------------------------------------------------------------------------------------------------------------------------------------------------------------------------------------------------------------------------------------------------------------------------------------------------------------------------------------------------------------------------------------------------------------------------------------------------------------------------------------------------------------------------------------------------------------------------------------------------------------------------------------------------------------------------------------------------------------------------------------------------------------------------------------------------------------------------------------------------------------------------------------------------------------------------------------------------------------------------------------------------------------------------------|
|               |                         | cg05774001,cg09439010,cg00087898,cg20677521,cg06905516,cg17266153,<br>cg25826644,cg25314134,cg03359428,cg19527748,cg05093315,cg04152341,<br>cg22717900,cg07740914,cg13445177,cg01182660,cg02703695,cg05947505,<br>cg09403024,cg20643159,cg09003326,cg06722917,cg20615655,cg23088110,<br>cg16937266,cg05105110,cg19785312,cg24651790,cg02105843,cg00752077,<br>cg13821031,cg08504577,cg09321430,cg14077232,cg26218805,cg13998226,<br>cg27307421,cg26984388,cg05881156,cg04284956,cg24710191,cg05222072,<br>cg22044134,cg04136817,cg08586494,cg02701137,cg00082656,cg08183300,<br>cg20706620,cg06659614,cg22068629,cg26140512,cg19502179,cg05263743,<br>cg21565802,cg15435485,cg03492460,cg22386757,cg00955895,cg23694533,<br>cg22445346,cg00342613,cg16438069,cg24716494,cg03342862,cg24500304,<br>cg04603928,cg08071391,cg14385566,cg24009362,cg12431453,cg14679235,<br>cg03169843,cg27524003,cg17748504,cg26836125,cg16010427,cg05546296,<br>cg09532502,cg06057750,cg02491003,cg11908291,cg19732831,cg08822578,<br>cg17155610,cg22153062,cg03859106,cg24108888,cg02084403,cg18885299,<br>cg09577966,cg01313965,cg10402804,cg26771320,cg13440882,cg04258046,<br>cg26860848,cg17027033,cg02755555,cg12142501,cg13673363,cg20454179,<br>cg00821510,cg04879348,cg21046959,cg06834705,cg00984787,cg27464378,<br>cg11896012,cg22392809,cg02159654,cg12484332,cg17578309,cg10215079,<br>cg03360716,cg00446213,cg05110629,cg00491591,cg13582724,cg02132460,<br>cg11807290,cg11677597,cg21185154,cg15749141,cg13810964,cg08249467,<br>cg01946966,cg21738716,cg04144604,cg07258419,cg19463703,cg08972843,<br>cg07783291,cg03281705,cg02275213,cg26840062,cg23341970,cg18007641,<br>cg16376484,cg16710828,cg21071940,cg19302283,cg00345656,cg05157272,<br>cg03982998,cg14129714,cg12589936,cg07190630,cg13831141,cg10533493,<br>cg02786368,cg09271353,cg08042477,cg00977895,cg02015439,cg18027632,<br>cg24331317,cg13950162,cg04458920,cg02812757,cg20497713,cg07573786,<br>cg26889774,cg15929624,cg20731100,cg03545117,cg20938103,cg24761212,<br>cg01064432,cg21751779,cg10110998,cg06297155,cg24839562,cg01630829,<br>cg09069150,cg14638662,cg18881992,cg05218782,cg06160221,cg01203563,<br>cg18690712,cg20786740,cg10010004,cg09529065,cg23455982,cg06655570,<br>cg05742691,cg11491652,cg02981094,cg22280402,cg08885316,cg16192293,<br>cg07520673,cg15412313,cg24073060,cg16741463,cg00147332,cg07596401,<br>cg00846287,cg02263880,cg17935214,cg09474625,cg03713453,cg15179921,<br>cg19008523,cg26469821,cg01840724,cg26917697,cg15992843,cg02913804,<br>cg21397124,cg00554341,cg06708683,cg14400821,cg00226961,cg19884600,<br>cg02295872,cg05632319,cg12266722,cg20625065,cg02354916,cg03716582,<br>cg03683004,cg12048805,cg13413387,cg21211551,cg05829424,cg08485259,<br>cg12257055,cg24838661,cg22882684,cg10955633,cg14509631,cg06157732,<br>cg15825373,cg01615453,cg19682249,cg20338276,cg26884837,cg02183561,<br>cg23678918,cg07875692,cg02002125,cg19892758,cg15482213,cg26950876,<br>cg17696660,cg02869126,cg04442042,cg17296165,cg21282998,cg06212582,<br>cg16758348,cg03552317,cg11072045,cg14161995,cg07629796,cg01195526,<br>cg01049121,cg24552391,cg11592938,cg03656734,cg00183569,cg10023624, |

| Intersections | No. of overlapping DMPs | List of overlapping DMPs                                                                                                                                                                                                                                                                                                                                                                                                                                                                                                                                                                                                                                                                                                                                                                                                                                                                                                                                                                                                                                                                                                                                                                                                                                                                                                                                                                                                                                                                                                                                                                                                                                                                                                                                                                                                                                                                                                                                                                                                                                                                                                                                                                                                                                                                                                                                                                                                                                                                                                                                                                                                                                                                                                                                                                                                                                                                                                                                                                                                                                                                                                                                                                             |
|---------------|-------------------------|------------------------------------------------------------------------------------------------------------------------------------------------------------------------------------------------------------------------------------------------------------------------------------------------------------------------------------------------------------------------------------------------------------------------------------------------------------------------------------------------------------------------------------------------------------------------------------------------------------------------------------------------------------------------------------------------------------------------------------------------------------------------------------------------------------------------------------------------------------------------------------------------------------------------------------------------------------------------------------------------------------------------------------------------------------------------------------------------------------------------------------------------------------------------------------------------------------------------------------------------------------------------------------------------------------------------------------------------------------------------------------------------------------------------------------------------------------------------------------------------------------------------------------------------------------------------------------------------------------------------------------------------------------------------------------------------------------------------------------------------------------------------------------------------------------------------------------------------------------------------------------------------------------------------------------------------------------------------------------------------------------------------------------------------------------------------------------------------------------------------------------------------------------------------------------------------------------------------------------------------------------------------------------------------------------------------------------------------------------------------------------------------------------------------------------------------------------------------------------------------------------------------------------------------------------------------------------------------------------------------------------------------------------------------------------------------------------------------------------------------------------------------------------------------------------------------------------------------------------------------------------------------------------------------------------------------------------------------------------------------------------------------------------------------------------------------------------------------------------------------------------------------------------------------------------------------------|
|               |                         | cg03385207,cg01237853,cg25615890,cg20262540,cg06240859,cg10368507,<br>cg10910666,cg14071459,cg24996200,cg26789922,cg00439735,cg03446203,<br>cg26475819,cg00451058,cg12555369,cg18802268,cg04347820,cg09588434,<br>cg25080322,cg11067338,cg13388830,cg27087192,cg23836113,cg21608387,<br>cg01954649,cg20894569,cg21792806,cg19755756,cg10059104,cg05274503,<br>cg10861426,cg08930897,cg25273903,cg03659851,cg22674789,cg19639021,<br>cg18160462,cg06112082,cg02923302,cg06600200,cg21191508,cg21164545,<br>cg01713095,cg26441097,cg22449686,cg12404462,cg09314700,cg06531517,<br>cg10854092,cg24313161,cg23907004,cg20895054,cg08924911,cg03272958,<br>cg20915460,cg11030124,cg15402112,cg07801506,cg21513537,cg09013092,<br>cg16600869,cg06910896,cg05266321,cg11754807,cg13188416,cg02230692,<br>cg02130289,cg05877590,cg19920161,cg13573346,cg15227771,cg01486987,<br>cg00546808,cg22077962,cg23630878,cg10890917,cg02241545,cg09366887,<br>cg24462263,cg14283475,cg11973514,cg20590059,cg15757342,cg08594632,<br>cg19458893,cg17341118,cg01630362,cg06868034,cg12320621,cg17841099,<br>cg07970724,cg00764840,cg13932217,cg11265874,cg22621663,cg26108836,<br>cg04591623,cg03141971,cg01449444,cg17792882,cg27413928,cg08995473,<br>cg26852404,cg12430902,cg24461508,cg20145695,cg02953679,cg18795277,<br>cg18726360,cg05571215,cg26085762,cg16511392,cg18436714,cg16886882,<br>cg13552506,cg08028698,cg03824238,cg22981198,cg07921682,cg20140735,<br>cg20986076,cg16657691,cg27620524,cg03353474,cg05333174,cg19535004,<br>cg10867456,cg01398168,cg27595997,cg10959344,cg05836646,cg09566453,<br>cg05934333,cg26301626,cg13122532,cg21238276,cg24859593,cg15996647,<br>cg27119063,cg12789833,cg10578681,cg22270690,cg21148531,cg14259893,<br>cg01703196,cg18522822,cg22692213,cg26317888,cg18070504,cg00413370,<br>cg26743898,cg09201173,cg10256790,cg23882417,cg23849965,cg08068547,<br>cg17947225,cg11163433,cg26174797,cg17324872,cg14244739,cg17628468,<br>cg12334842,cg00076936,cg14997702,cg21125095,cg04065297,cg00051510,<br>cg23990682,cg11019127,cg12608975,cg17730759,cg16058430,cg21385748,<br>cg06921605,cg20119308,cg14243899,cg21831927,cg12482432,cg27551697,<br>cg09853648,cg10954454,cg22669624,cg08719077,cg14727763,cg09450550,<br>cg13685779,cg11806823,cg24704082,cg03983684,cg00506859,cg00365411,<br>cg26713125,cg02663317,cg06360121,cg15057735,cg12750276,cg02035015,<br>cg07980295,cg04848972,cg07575166,cg26283801,cg26691898,cg15531814,<br>cg00175423,cg17419329,cg15266307,cg07943688,cg14683055,cg22633597,<br>cg09751673,cg20268994,cg16966520,cg10241247,cg16673712,cg14038214,<br>cg18689082,cg22272240,cg15626873,cg22562498,cg14330621,cg24060317,<br>cg17528325,cg10967866,cg14212631,cg03890998,cg03974286,cg12098665,<br>cg15598425,cg09770389,cg19683188,cg23262420,cg19248505,cg25245744,<br>cg21152173,cg25576282,cg09813341,cg13050142,cg10996532,cg16741245,<br>cg16873780,cg05344692,cg05583095,cg04884395,cg18461093,cg04140267,<br>cg09168272,cg13554030,cg06633484,cg10643608,cg26637826,cg00715913,<br>cg16091630,cg01447350,cg27638509,cg10314470,cg27411706,cg19316897,<br>cg15152789,cg01795660,cg13483593,cg00062070,cg02481294,cg08866469, |

| Intersections | No. of overlapping DMPs | List of overlapping DMPs                                                                                                                                                                                                                                                                                                                                                                                                                                                                                                                                                                                                                                                                                                                                                                                                                                                                                                                                                                                                                                                                                                                                                                                                                                                                                                                                                                                                                                                                                                                                                                                                                                                                                                                                                                                                                                                                                                                                                                                                                                                                                                                                                                                                                                                                                                                                                                                                                                                                                                                                                                                                                                                                                                                                                                                                                                                                                                                                                                                                                                                                                                                                                                             |
|---------------|-------------------------|------------------------------------------------------------------------------------------------------------------------------------------------------------------------------------------------------------------------------------------------------------------------------------------------------------------------------------------------------------------------------------------------------------------------------------------------------------------------------------------------------------------------------------------------------------------------------------------------------------------------------------------------------------------------------------------------------------------------------------------------------------------------------------------------------------------------------------------------------------------------------------------------------------------------------------------------------------------------------------------------------------------------------------------------------------------------------------------------------------------------------------------------------------------------------------------------------------------------------------------------------------------------------------------------------------------------------------------------------------------------------------------------------------------------------------------------------------------------------------------------------------------------------------------------------------------------------------------------------------------------------------------------------------------------------------------------------------------------------------------------------------------------------------------------------------------------------------------------------------------------------------------------------------------------------------------------------------------------------------------------------------------------------------------------------------------------------------------------------------------------------------------------------------------------------------------------------------------------------------------------------------------------------------------------------------------------------------------------------------------------------------------------------------------------------------------------------------------------------------------------------------------------------------------------------------------------------------------------------------------------------------------------------------------------------------------------------------------------------------------------------------------------------------------------------------------------------------------------------------------------------------------------------------------------------------------------------------------------------------------------------------------------------------------------------------------------------------------------------------------------------------------------------------------------------------------------------|
|               |                         | cg21694626,cg15652280,cg00178785,cg01009068,cg00727586,cg13960894,<br>cg17672031,cg25367374,cg26063030,cg20247222,cg14036226,cg12995004,<br>cg02361881,cg21578783,cg13335863,cg12442242,cg07277465,cg20674419,<br>cg22541831,cg01174674,cg07269146,cg13998990,cg11516226,cg00879786,<br>cg08043017,cg14975881,cg07063183,cg18021101,cg24616081,cg20728419,<br>cg12027843,cg18644525,cg05720491,cg02252828,cg18876623,cg04128367,<br>cg04143547,cg21050667,cg06442472,cg19038282,cg18199495,cg03826683,<br>cg22073507,cg04563169,cg05269246,cg10040969,cg26797811,cg00575903,<br>cg03437916,cg25760395,cg01220560,cg16356630,cg27248581,cg24102491,<br>cg22489198,cg13086586,cg27429917,cg00701316,cg00388732,cg05567646,<br>cg25037274,cg13132816,cg15586842,cg23101093,cg01919034,cg23351190,<br>cg06659867,cg10347474,cg01808050,cg04550237,cg01996643,cg18264519,<br>cg16430099,cg12375876,cg10765877,cg00861824,cg09931146,cg05250380,<br>cg19513514,cg02404507,cg03258272,cg13078931,cg15471398,cg03887676,<br>cg25997110,cg07926770,cg23769345,cg00834234,cg11085971,cg11812143,<br>cg02975091,cg01388301,cg10478863,cg17970482,cg00666211,cg18562923,<br>cg02288552,cg16243197,cg09664593,cg22814944,cg20674547,cg06142142,<br>cg13328067,cg13131111,cg21948564,cg00702369,cg03221984,cg18496965,<br>cg03986418,cg07793537,cg05773164,cg20030852,cg06034238,cg05105212,<br>cg03311682,cg13758932,cg11227941,cg16851359,cg21803141,cg22170222,<br>cg10693065,cg01135961,cg02129877,cg27642883,cg23647968,cg06151505,<br>cg03778258,cg18617527,cg00605545,cg17073323,cg27431237,cg00427150,<br>cg16648603,cg26040075,cg18917270,cg00261621,cg12344862,cg19961277,<br>cg09758248,cg22085718,cg08564657,cg06808227,cg17063731,cg13642800,<br>cg12283362,cg09736526,cg06557127,cg22943875,cg00363815,cg19461907,<br>cg15213026,cg26243679,cg13357708,cg18945671,cg21590238,cg21825757,<br>cg08748794,cg02711665,cg14742851,cg09581413,cg03845683,cg06211385,<br>cg04583163,cg10172319,cg17249729,cg07295197,cg04551025,cg19646204,<br>cg24437314,cg07132926,cg11556122,cg16912134,cg08403296,cg24695281,<br>cg08622563,cg00110695,cg07792446,cg05389922,cg03039025,cg10426482,<br>cg00477817,cg04626915,cg10362294,cg14080881,cg13020386,cg24591118,<br>cg15277311,cg13934722,cg14431001,cg01101177,cg00800038,cg23237516,<br>cg06754191,cg23816019,cg02630829,cg00657581,cg24220766,cg23299156,<br>cg13461762,cg03615476,cg03853124,cg04963553,cg00535466,cg20863321,<br>cg14847095,cg21179412,cg03595262,cg12052754,cg18884536,cg02509204,<br>cg08857436,cg19777318,cg26427417,cg03216596,cg08109808,cg15967169,<br>cg13930665,cg27094305,cg14550212,cg11587748,cg21592690,cg26183021,<br>cg00682203,cg09822812,cg05043657,cg13341441,cg05717478,cg20171451,<br>cg04628206,cg16613176,cg04649441,cg10370687,cg05628357,cg23295491,<br>cg00850868,cg03395044,cg19932993,cg01774477,cg08012156,cg10586082,<br>cg15379825,cg03415649,cg17286985,cg18193230,cg21944219,cg00470768,<br>cg14290291,cg16135164,cg05168280,cg22035897,cg13637552,cg03393472,<br>cg17590234,cg17809780,cg13976251,cg27562595,cg17375177,cg15378274,<br>cg18724709,cg02380561,cg24306422,cg17462468,cg05340577,cg04805512, |



| Intersections | No. of overlapping DMPs | List of overlapping DMPs                                                                                                                                                                                                                                                                                                                                                                                                                                                                                                                                                                                                                                                                                                                                                                                                                                                                                                                                                                                                                                                                                                                                                                                                                                                                                                                                                                                                                                                                                                                                                                                                                                                                                                                                                                                                                                                                                                                                                                                                                                                                                                                                                                                                                                                                                                                                                                                                                                                                                                                                                                                                                                                                                                                                                                                                                                                                                                                                                                                                                                                                                                                                                                             |
|---------------|-------------------------|------------------------------------------------------------------------------------------------------------------------------------------------------------------------------------------------------------------------------------------------------------------------------------------------------------------------------------------------------------------------------------------------------------------------------------------------------------------------------------------------------------------------------------------------------------------------------------------------------------------------------------------------------------------------------------------------------------------------------------------------------------------------------------------------------------------------------------------------------------------------------------------------------------------------------------------------------------------------------------------------------------------------------------------------------------------------------------------------------------------------------------------------------------------------------------------------------------------------------------------------------------------------------------------------------------------------------------------------------------------------------------------------------------------------------------------------------------------------------------------------------------------------------------------------------------------------------------------------------------------------------------------------------------------------------------------------------------------------------------------------------------------------------------------------------------------------------------------------------------------------------------------------------------------------------------------------------------------------------------------------------------------------------------------------------------------------------------------------------------------------------------------------------------------------------------------------------------------------------------------------------------------------------------------------------------------------------------------------------------------------------------------------------------------------------------------------------------------------------------------------------------------------------------------------------------------------------------------------------------------------------------------------------------------------------------------------------------------------------------------------------------------------------------------------------------------------------------------------------------------------------------------------------------------------------------------------------------------------------------------------------------------------------------------------------------------------------------------------------------------------------------------------------------------------------------------------------|
|               |                         | cg13978991,cg18561871,cg17861477,cg07351592,cg19987349,cg25215594,<br>cg07711067,cg06393998,cg15473395,cg16793607,cg10148231,cg04938335,<br>cg04826176,cg23020752,cg01289561,cg18589543,cg17875260,cg20125407,<br>cg09364127,cg25971128,cg01521225,cg12740087,cg02377024,cg07645858,<br>cg13134082,cg24651708,cg00718418,cg04916980,cg01957629,cg00246547,<br>cg13174660,cg20932762,cg00072407,cg10317162,cg05549970,cg26982323,<br>cg16929959,cg22635075,cg20668812,cg10995473,cg09486594,cg24727188,<br>cg17665552,cg15601859,cg01507833,cg08009313,cg10210928,cg12622520,<br>cg26776722,cg08537599,cg05863841,cg23714454,cg22748470,cg03516636,<br>cg26131927,cg19191502,cg01858458,cg03930577,cg13934990,cg14069835,<br>cg10593816,cg25203036,cg15990679,cg18532208,cg20740203,cg22238304,<br>cg18885872,cg24171807,cg26994859,cg05389034,cg18641433,cg05431656,<br>cg11736740,cg26650701,cg07470284,cg14248680,cg01734338,cg15715969,<br>cg17131053,cg11610831,cg26281971,cg11640384,cg02744713,cg25294651,<br>cg04040935,cg19563410,cg02993013,cg01782154,cg03865947,cg10612060,<br>cg22636631,cg10568796,cg03694875,cg00872232,cg13298827,cg24063594,<br>cg04254389,cg09762054,cg26484361,cg04109704,cg05362860,cg02104456,<br>cg16300033,cg17505339,cg12447937,cg03291430,cg19493162,cg09231555,<br>cg19487745,cg21909286,cg22629515,cg24777071,cg11463522,cg24805307,<br>cg26301777,cg11791725,cg09497391,cg22604496,cg00781795,cg23434122,<br>cg03734677,cg25828607,cg23101469,cg18192414,cg26747301,cg20018396,<br>cg09556178,cg07612889,cg07061975,cg03788567,cg27107611,cg03261347,<br>cg26103331,cg21618694,cg08550882,cg11361049,cg04349266,cg19210342,<br>cg19532617,cg10716356,cg23597907,cg16790676,cg23878917,cg18803747,<br>cg24636611,cg20526432,cg20715291,cg02376664,cg17313042,cg16547125,<br>cg23748584,cg08095345,cg04025244,cg08254315,cg11152012,cg09153458,<br>cg22813165,cg23828422,cg04031454,cg27383744,cg05607320,cg08160526,<br>cg03805929,cg15287541,cg13629903,cg22462000,cg03696592,cg00954931,<br>cg22167093,cg22450197,cg19406863,cg15115413,cg16736799,cg02952548,<br>cg11786283,cg00914084,cg03143333,cg12524776,cg03198186,cg14377342,<br>cg24607603,cg01292924,cg07997387,cg02848097,cg10747758,cg15912014,<br>cg23365723,cg09501333,cg24291485,cg05950923,cg03833512,cg27539472,<br>cg26886965,cg13613011,cg09177194,cg03355286,cg12185938,cg13514165,<br>cg18516228,cg21827626,cg02190786,cg06766579,cg12204171,cg06424550,<br>cg04815812,cg16999495,cg07080785,cg05636912,cg19957411,cg26612736,<br>cg15632673,cg02915805,cg07027119,cg01374440,cg13064046,cg17559292,<br>cg15067386,cg03344608,cg27268640,cg25597177,cg05180512,cg11177858,<br>cg15493018,cg02294570,cg22942210,cg00086429,cg23065757,cg13386084,<br>cg14435659,cg17364250,cg09545764,cg04605148,cg02586949,cg26532930,<br>cg20415697,cg00800809,cg02292720,cg09466312,cg20349574,cg23055064,<br>cg05560494,cg02767673,cg01541565,cg22036487,cg00891176,cg27210269,<br>cg01202731,cg14465801,cg03584693,cg02583183,cg19281864,cg07468862,<br>cg20355676,cg25265930,cg25712758,cg08970795,cg22712955,cg08270888,<br>cg23158189,cg06613547,cg07016571,cg00448889,cg00603673,cg13823166, |

| Intersections | No. of overlapping DMPs | List of overlapping DMPs                                                                                                                                                                                                                                                                                                                                                                                                                                                                                                                                                                                                                                                                                                                                                                                                                                                                                                                                                                                                                                                                                                                                                                                                                                                                                                                                                                                                                                                                                                                                                                                                                                                                                                                                                                                                                                                                                                                                                                                                                                                                                                                                                                                                                                                                                                                                                                                                                                                                                                                                                                                                                                                                                                                                                                                                                                                                                                                                                                                                                                                                                                                                                                             |
|---------------|-------------------------|------------------------------------------------------------------------------------------------------------------------------------------------------------------------------------------------------------------------------------------------------------------------------------------------------------------------------------------------------------------------------------------------------------------------------------------------------------------------------------------------------------------------------------------------------------------------------------------------------------------------------------------------------------------------------------------------------------------------------------------------------------------------------------------------------------------------------------------------------------------------------------------------------------------------------------------------------------------------------------------------------------------------------------------------------------------------------------------------------------------------------------------------------------------------------------------------------------------------------------------------------------------------------------------------------------------------------------------------------------------------------------------------------------------------------------------------------------------------------------------------------------------------------------------------------------------------------------------------------------------------------------------------------------------------------------------------------------------------------------------------------------------------------------------------------------------------------------------------------------------------------------------------------------------------------------------------------------------------------------------------------------------------------------------------------------------------------------------------------------------------------------------------------------------------------------------------------------------------------------------------------------------------------------------------------------------------------------------------------------------------------------------------------------------------------------------------------------------------------------------------------------------------------------------------------------------------------------------------------------------------------------------------------------------------------------------------------------------------------------------------------------------------------------------------------------------------------------------------------------------------------------------------------------------------------------------------------------------------------------------------------------------------------------------------------------------------------------------------------------------------------------------------------------------------------------------------------|
|               |                         | cg01182973,cg02998155,cg14835484,cg06574881,cg26394282,cg05570682,<br>cg21512370,cg17714154,cg05331252,cg00847301,cg18450293,cg22676447,<br>cg03902905,cg04983519,cg07473909,cg00989238,cg10141352,cg16826218,<br>cg02362309,cg00408605,cg17929152,cg24337310,cg04204557,cg05269713,<br>cg08223835,cg13571802,cg10555000,cg15587018,cg20449764,cg13910907,<br>cg13838832,cg00221096,cg23175907,cg21756765,cg06215556,cg15535114,<br>cg27553564,cg11806813,cg02572033,cg12525514,cg16713069,cg04792167,<br>cg19950767,cg15246460,cg13316257,cg24696735,cg18867781,cg06338697,<br>cg05239771,cg07421068,cg14516566,cg22230559,cg11748170,cg06624244,<br>cg00599328,cg01341130,cg21220870,cg00513781,cg08874470,cg09050048,<br>cg05152653,cg08447044,cg26154534,cg26279614,cg26915384,cg05834354,<br>cg25737169,cg02317375,cg05286791,cg01333532,cg20930489,cg19565241,<br>cg13394785,cg26113972,cg18474563,cg24212248,cg22523074,cg17420774,<br>cg21413754,cg26720073,cg22466850,cg18908342,cg26227943,cg00975587,<br>cg09884851,cg21562638,cg24700494,cg09747054,cg11641080,cg06223797,<br>cg07801516,cg02247211,cg12635848,cg04114269,cg06585606,cg09979356,<br>cg04824666,cg09461494,cg17820495,cg10188698,cg05565807,cg03808043,<br>cg19614627,cg23825344,cg23528297,cg10202675,cg01104200,cg05977276,<br>cg26892308,cg03039294,cg14202791,cg02747612,cg17431301,cg01696060,<br>cg11325576,cg02255892,cg01092531,cg15434398,cg08547427,cg09243824,<br>cg06599575,cg22654949,cg10173001,cg25141418,cg04097394,cg20852653,<br>cg26502817,cg18079653,cg13639582,cg10635719,cg02656873,cg04917409,<br>cg12158165,cg02553302,cg22284302,cg02981041,cg22351824,cg23389807,<br>cg03729042,cg17128082,cg08703289,cg14104700,cg24246245,cg26414564,<br>cg23819027,cg16358215,cg20105087,cg18935740,cg10369313,cg01523027,<br>cg03752430,cg22909296,cg05889294,cg07773272,cg03268737,cg01518398,<br>cg11823382,cg20073882,cg21700831,cg26629556,cg27480957,cg23712897,<br>cg16919579,cg09124018,cg10797856,cg24096828,cg11979618,cg15637781,<br>cg23486661,cg04462547,cg01825203,cg18360585,cg08237400,cg22807576,<br>cg16996457,cg16359654,cg11327565,cg04910692,cg17868778,cg14349131,<br>cg18304242,cg17378655,cg24328054,cg07029084,cg09816107,cg03731251,<br>cg07180182,cg02868123,cg07709195,cg11968166,cg24395241,cg13549760,<br>cg26182313,cg04990609,cg15118519,cg22459078,cg08857545,cg03057072,<br>cg03926968,cg19969431,cg01607187,cg20138055,cg11709211,cg12502155,<br>cg26566411,cg00779056,cg20834966,cg08885100,cg03929077,cg04849201,<br>cg00531054,cg01335566,cg18011078,cg13484614,cg08056835,cg01255646,<br>cg18175611,cg10930676,cg10703101,cg10239978,cg02044172,cg03195015,<br>cg04226766,cg12492289,cg21287017,cg19123462,cg20027684,cg15069785,<br>cg11265952,cg00022606,cg22990888,cg17916447,cg21830726,cg06419562,<br>cg00081852,cg13653680,cg12130250,cg11677105,cg10819981,cg09563451,<br>cg02130266,cg02903279,cg11239335,cg14027704,cg24517611,cg26675905,<br>cg24901609,cg11289591,cg06577028,cg23968650,cg23901843,cg01761277,<br>cg10220850,cg27513225,cg24755297,cg12178432,cg01320648,cg13487422,<br>cg17971210,cg09516898,cg05841219,cg15843977,cg00043080,cg23058911, |

| Intersections | No. of overlapping DMPs | List of overlapping DMPs                                                                                                                                                                                                                                                                                                                                                                                                                                                                                                                                                                                                                                                                                                                                                                                                                                                                                                                                                                                                                                                                                                                                                                                                                                                                                                                                                                                                                                                                                                                                                                                                                                                                                                                                                                                                                                                                                                                                                                                                                                                                                                                                                                                                                                                                                                                                                                                                                                                                                                                                                                                                                                                                                                                                                                                                                                                                                                                                                                                                                                                                                                                                                                             |
|---------------|-------------------------|------------------------------------------------------------------------------------------------------------------------------------------------------------------------------------------------------------------------------------------------------------------------------------------------------------------------------------------------------------------------------------------------------------------------------------------------------------------------------------------------------------------------------------------------------------------------------------------------------------------------------------------------------------------------------------------------------------------------------------------------------------------------------------------------------------------------------------------------------------------------------------------------------------------------------------------------------------------------------------------------------------------------------------------------------------------------------------------------------------------------------------------------------------------------------------------------------------------------------------------------------------------------------------------------------------------------------------------------------------------------------------------------------------------------------------------------------------------------------------------------------------------------------------------------------------------------------------------------------------------------------------------------------------------------------------------------------------------------------------------------------------------------------------------------------------------------------------------------------------------------------------------------------------------------------------------------------------------------------------------------------------------------------------------------------------------------------------------------------------------------------------------------------------------------------------------------------------------------------------------------------------------------------------------------------------------------------------------------------------------------------------------------------------------------------------------------------------------------------------------------------------------------------------------------------------------------------------------------------------------------------------------------------------------------------------------------------------------------------------------------------------------------------------------------------------------------------------------------------------------------------------------------------------------------------------------------------------------------------------------------------------------------------------------------------------------------------------------------------------------------------------------------------------------------------------------------------|
|               |                         | cg10930667,cg17145983,cg27560687,cg12946080,cg04076763,cg13817353,<br>cg21632117,cg08880904,cg03353804,cg04285493,cg12440728,cg12610079,<br>cg00776427,cg02386644,cg02262873,cg02237704,cg22922010,cg24467825,<br>cg05153791,cg10174975,cg03169856,cg21173221,cg20788133,cg22875855,<br>cg22048274,cg15758403,cg21046954,cg16149628,cg27662204,cg10544839,<br>cg27430465,cg09267674,cg05925927,cg27208012,cg16563180,cg16054502,<br>cg16494843,cg25209294,cg10702394,cg06673956,cg15120497,cg01892997,<br>cg25598062,cg25619312,cg08455021,cg24556854,cg20662018,cg00263326,<br>cg23873683,cg07380384,cg22721170,cg20299105,cg24805126,cg13781498,<br>cg15768620,cg10727416,cg14052688,cg02243606,cg01834029,cg18918155,<br>cg26511337,cg00378007,cg14400179,cg08858643,cg07553580,cg03646967,<br>cg23331966,cg11589509,cg03789934,cg09499379,cg26979044,cg22964775,<br>cg06846752,cg27630274,cg19493789,cg01960043,cg07437919,cg00217442,<br>cg01880743,cg14276973,cg06526042,cg14180758,cg00693222,cg24023023,<br>cg08929467,cg22179018,cg04823492,cg07602984,cg08845025,cg25540004,<br>cg03946106,cg01165203,cg01618287,cg09494546,cg02637052,cg13562011,<br>cg07959403,cg26153497,cg07442204,cg13453110,cg21196492,cg22534919,<br>cg06238779,cg25798479,cg27312049,cg27131197,cg12132429,cg02888513,<br>cg18892132,cg04830471,cg01369276,cg01526919,cg11793413,cg06812099,<br>cg19517014,cg15720500,cg09741995,cg12520727,cg15988785,cg19534906,<br>cg10431365,cg08098111,cg06576765,cg16807420,cg17975976,cg08849542,<br>cg26845430,cg02845997,cg07456314,cg14168996,cg07461370,cg14971418,<br>cg03747003,cg01050740,cg05791482,cg07054526,cg23367286,cg13690703,<br>cg13224855,cg19052829,cg20587332,cg18529251,cg03825238,cg05644735,<br>cg11890795,cg25922355,cg03672499,cg10113618,cg22723802,cg00528779,<br>cg04551318,cg25958062,cg02813542,cg24845763,cg00481415,cg13464157,<br>cg18975690,cg07798407,cg25851488,cg18280933,cg07834934,cg26148377,<br>cg07913806,cg04940526,cg26585326,cg20252517,cg07790939,cg03132202,<br>cg07232688,cg14222630,cg23003872,cg23081488,cg24690069,cg18467041,<br>cg11644123,cg20891622,cg08489682,cg25666995,cg04935792,cg19515510,<br>cg19744051,cg12510108,cg03201367,cg11852073,cg24451888,cg01779076,<br>cg11165316,cg05689028,cg13046801,cg23684316,cg02554626,cg14582970,<br>cg02561720,cg04307553,cg03502656,cg07283616,cg07444152,cg05796504,<br>cg19265948,cg02528862,cg14156768,cg24421839,cg00974107,cg01634102,<br>cg14567260,cg06341189,cg09073441,cg26020008,cg24741793,cg13278241,<br>cg16946007,cg24763467,cg10615065,cg05045104,cg26664737,cg14231674,<br>cg04090794,cg11401986,cg04892998,cg09067747,cg25564733,cg08097057,<br>cg09096967,cg11409139,cg01905618,cg00215922,cg13210820,cg27633762,<br>cg00236077,cg01998262,cg10496659,cg03199084,cg22271515,cg18085869,<br>cg03039797,cg09387867,cg19644336,cg17653190,cg22574586,cg01881525,<br>cg09595245,cg13431883,cg00110039,cg20994227,cg16402142,cg01403607,<br>cg02290197,cg07028249,cg09399225,cg06692606,cg10197405,cg03036510,<br>cg09551645,cg24091975,cg26447146,cg02089795,cg27440751,cg10620911,<br>cg19453353,cg02603868,cg13279713,cg17761225,cg04960798,cg24334230, |

| Intersections | No. of overlapping DMPs | List of overlapping DMPs                                                                                                                                                                                                                                                                                                                                                                                                                                                                                                                                                                                                                                                                                                                                                                                                                                                                                                                                                                                                                                                                                                                                                                                                                                                                                                                                                                                                                                                                                                                                                                                                                                                                                                                                                                                                                                                                                                                                                                                                                                                                                                                                                                                                                                                                                                                                                                                                                                                                                                                                                                                                                                                                                                                                                                                                                                                                                                                                                                                                                                                                                                                                                                             |
|---------------|-------------------------|------------------------------------------------------------------------------------------------------------------------------------------------------------------------------------------------------------------------------------------------------------------------------------------------------------------------------------------------------------------------------------------------------------------------------------------------------------------------------------------------------------------------------------------------------------------------------------------------------------------------------------------------------------------------------------------------------------------------------------------------------------------------------------------------------------------------------------------------------------------------------------------------------------------------------------------------------------------------------------------------------------------------------------------------------------------------------------------------------------------------------------------------------------------------------------------------------------------------------------------------------------------------------------------------------------------------------------------------------------------------------------------------------------------------------------------------------------------------------------------------------------------------------------------------------------------------------------------------------------------------------------------------------------------------------------------------------------------------------------------------------------------------------------------------------------------------------------------------------------------------------------------------------------------------------------------------------------------------------------------------------------------------------------------------------------------------------------------------------------------------------------------------------------------------------------------------------------------------------------------------------------------------------------------------------------------------------------------------------------------------------------------------------------------------------------------------------------------------------------------------------------------------------------------------------------------------------------------------------------------------------------------------------------------------------------------------------------------------------------------------------------------------------------------------------------------------------------------------------------------------------------------------------------------------------------------------------------------------------------------------------------------------------------------------------------------------------------------------------------------------------------------------------------------------------------------------------|
|               |                         | cg19554235,cg18428201,cg03188356,cg12014368,cg01816714,cg20609972,<br>cg16381523,cg00699996,cg05435581,cg15085431,cg23210127,cg03408497,<br>cg21696677,cg04671614,cg13511067,cg04947561,cg01864295,cg14711592,<br>cg20047924,cg09344219,cg17875584,cg08094135,cg19689922,cg02507657,<br>cg10897631,cg13660998,cg16884295,cg18002519,cg17117697,cg22692843,<br>cg27078727,cg24375690,cg11466485,cg06970744,cg15288420,cg14035828,<br>cg06560422,cg12483682,cg17435182,cg11320544,cg08342092,cg06846186,<br>cg23287661,cg00458652,cg10455503,cg14043752,cg26453295,cg20959851,<br>cg03539808,cg09608716,cg12757890,cg13471254,cg25676890,cg06113303,<br>cg03316030,cg17445557,cg07188198,cg10140613,cg08254733,cg24304733,<br>cg09952674,cg11973716,cg06025981,cg22993400,cg00473045,cg09150309,<br>cg23477940,cg10214968,cg03113740,cg00380846,cg18150687,cg26385011,<br>cg08928569,cg26986620,cg02094071,cg19227511,cg00863716,cg13649036,<br>cg07257190,cg26318321,cg01824349,cg20627903,cg02610070,cg12699127,<br>cg02241111,cg25428494,cg05371599,cg21160906,cg17457379,cg27324781,<br>cg05153057,cg21096345,cg19528371,cg03537567,cg06101841,cg15611936,<br>cg03012728,cg19410143,cg25758137,cg00534626,cg24509398,cg19840093,<br>cg22681114,cg12556608,cg26670636,cg14427563,cg13282547,cg27162642,<br>cg05904806,cg03115746,cg10877458,cg07282454,cg13362404,cg06124110,<br>cg02496065,cg17795265,cg05042213,cg27165687,cg27234747,cg12459603,<br>cg25030549,cg26922625,cg24700515,cg03530260,cg14061886,cg14038618,<br>cg08492178,cg00808352,cg09908014,cg23219808,cg20836546,cg03373960,<br>cg19350479,cg12048617,cg25644323,cg17001868,cg02923669,cg14421779,<br>cg11564268,cg07780534,cg00066512,cg07222908,cg20311065,cg06957677,<br>cg03767562,cg26269630,cg02360478,cg10747603,cg13551841,cg01106989,<br>cg03045014,cg15480962,cg02432009,cg20675440,cg12903648,cg14404146,<br>cg04546557,cg15238664,cg14216331,cg00002473,cg02773399,cg03410632,<br>cg09660211,cg07398558,cg14220634,cg24139720,cg01843804,cg09991426,<br>cg06945747,cg22924269,cg18344056,cg10041379,cg06182770,cg16077168,<br>cg21213571,cg27170159,cg23171636,cg19239930,cg22482048,cg07762785,<br>cg10326403,cg06323624,cg19647197,cg16786721,cg00292073,cg26933865,<br>cg10108539,cg12800145,cg00015373,cg16578802,cg20559736,cg04194066,<br>cg18659028,cg15894467,cg26663742,cg01185138,cg09474476,cg02238387,<br>cg08045489,cg17178777,cg06698828,cg14641774,cg17862468,cg16558333,<br>cg02232667,cg09739850,cg13957124,cg04851992,cg22037121,cg11721273,<br>cg02424995,cg12224855,cg24630782,cg19269323,cg13832059,cg23099740,<br>cg06737484,cg07598324,cg13597865,cg23989712,cg20197694,cg04224084,<br>cg21255826,cg21771473,cg16518825,cg03697411,cg25187622,cg05105016,<br>cg07756562,cg03551378,cg04943440,cg15076820,cg04900179,cg01456626,<br>cg07034700,cg16134501,cg11105927,cg14199837,cg10047762,cg00934997,<br>cg20803076,cg14263351,cg07378778,cg04130408,cg02918786,cg04831589,<br>cg19350469,cg11041239,cg21616720,cg12514654,cg17145652,cg15543199,<br>cg19069283,cg25211348,cg14831653,cg14485581,cg11361658,cg22573590,<br>cg03792839,cg09096476,cg01166159,cg25435714,cg05638883,cg26731834, |

| Intersections     | No. of overlapping DMPs | List of overlapping DMPs                                                                                                                                                                                                                                                                                                                                                                                                                                                                                                                                                                                                                                                                                                                                                                                                                                                                                                                                                                                                                                                                                                                                                                                                                                                                                                                                                                                                                                                                                                                                                                                                                                                                                                                                                                                                                                                                                                                                                                                                                                                                                                                                                                                                                                                                                                                                                                                                                                                                                                                                                                                                                                                                                                                             |
|-------------------|-------------------------|------------------------------------------------------------------------------------------------------------------------------------------------------------------------------------------------------------------------------------------------------------------------------------------------------------------------------------------------------------------------------------------------------------------------------------------------------------------------------------------------------------------------------------------------------------------------------------------------------------------------------------------------------------------------------------------------------------------------------------------------------------------------------------------------------------------------------------------------------------------------------------------------------------------------------------------------------------------------------------------------------------------------------------------------------------------------------------------------------------------------------------------------------------------------------------------------------------------------------------------------------------------------------------------------------------------------------------------------------------------------------------------------------------------------------------------------------------------------------------------------------------------------------------------------------------------------------------------------------------------------------------------------------------------------------------------------------------------------------------------------------------------------------------------------------------------------------------------------------------------------------------------------------------------------------------------------------------------------------------------------------------------------------------------------------------------------------------------------------------------------------------------------------------------------------------------------------------------------------------------------------------------------------------------------------------------------------------------------------------------------------------------------------------------------------------------------------------------------------------------------------------------------------------------------------------------------------------------------------------------------------------------------------------------------------------------------------------------------------------------------------|
|                   |                         | cg06250423,cg01531551,cg08159831,cg04084052,cg03612700,cg04757410,<br>cg27022602,cg00935351,cg18401511,cg20022118,cg15155568,cg01006587,<br>cg26701810,cg08356248,cg14827285,cg08137638,cg22355895,cg05323272,<br>cg04181696,cg02964359,cg19566878,cg23960922,cg03523434,cg14754243,<br>cg24279701,cg27372181,cg23877512,cg18021100,cg09158651,cg27421105,<br>cg03014011,cg18553202,cg09739912,cg25916771,cg27095983,cg16427530,<br>cg04677937,cg01766505,cg11136406,cg01925662,cg14134015,cg13675624,<br>cg05329180,cg03560936,cg22236073,cg10677688,cg00644922,cg20667822,<br>cg08983259,cg03640443,cg11489821,cg13221681,cg20389750,cg10515950,<br>cg19665882,cg02397533,cg01783051,cg13024585,cg27392815,cg18135704,<br>cg26638920,cg22825550,cg22731215,cg03770187,cg03849728,cg04098176,<br>cg16792978,cg06868699,cg21185320,cg03654080,cg14093289,cg09259004,<br>cg21835298,cg14185323,cg15648790,cg23406815,cg06970454,cg23615248,<br>cg08831522,cg20416574,cg12707723,cg25047058,cg02290855,cg12576523,<br>cg13637899,cg07240043,cg05310646,cg14321777,cg07162124,cg13877944,<br>cg22871659,cg10631684,cg05933901,cg08459182,cg06084379,cg08751025,<br>cg09497124,cg10045446,cg25039902,cg26902504,cg14844138,cg13036878,<br>cg10295126,cg08371086,cg15132055,cg00702837,cg01323706,cg25552017,<br>cg23402397,cg01579172,cg06745965,cg14394011,cg04434491,cg15623444,<br>cg02462962,cg15278957,cg13154024,cg26001590,cg00418479,cg20836993,<br>cg01348594,cg14470762,cg12470721,cg11443973,cg24300962,cg01079307,<br>cg18296448,cg09592546,cg10146330,cg24542200,cg24792360,cg01772945,<br>cg24182328,cg20895092,cg23423607,cg05073382,cg10059324,cg11226289,<br>cg08329561,cg12478809,cg06988547,cg03710889,cg25283432,cg01270736,<br>cg11438448,cg02298570,cg08947084,cg06670380,cg15027630,cg22683036,<br>cg05798318,cg05640721,cg09168728,cg13749477,cg11859345,cg24082680,<br>cg08516792,cg20237264,cg22062537,cg21300361,cg07518330,cg06366791,<br>cg26408612,cg17951488,cg07628769,cg26701510,cg15726387,cg13606720,<br>cg26824826,cg14570121,cg11111835,cg24505687,cg01810763,cg16678686,<br>cg03601368,cg00053536,cg17129519,cg17484267,cg07730946,cg04102427,<br>cg12810701,cg13770865,cg00837103,cg02169692,cg15501415,cg09536337,<br>cg10211626,cg20468462,cg04730459,cg10202544,cg23014672,cg24351819,<br>cg25513090,cg27547695,cg23806014,cg08428949,cg18699242,cg03085932,<br>cg20255560,cg16452272,cg26075252,cg04072156,cg25151803,cg23087661,<br>cg11379605,cg21515494,cg18920490,cg03567106,cg10945028,cg08136070,<br>cg00445013,cg06438114,cg00590330,cg25964019,cg18183019,cg24337318,<br>cg18822580,cg18758405,cg10071848,cg09425611,cg20465830,cg00975912,<br>cg07020453,cg05444548,cg24803614,cg19075506,cg01864361 |
| - ASD+16p11.2 del | 39                      | cg09592546,cg10146330,cg24542200,cg24792360,cg01772945,cg24182328,<br>cg20895092,cg23423607,cg05073382,cg10059324,cg11226289,cg08329561,<br>cg12478809,cg06988547,cg03710889,cg25283432,cg01270736,cg11438448,<br>cg02298570,cg08947084,cg06670380,cg15027630,cg22683036,cg05798318,<br>cg05640721,cg09168728,cg13749477,cg11859345,cg24082680,cg08516792,                                                                                                                                                                                                                                                                                                                                                                                                                                                                                                                                                                                                                                                                                                                                                                                                                                                                                                                                                                                                                                                                                                                                                                                                                                                                                                                                                                                                                                                                                                                                                                                                                                                                                                                                                                                                                                                                                                                                                                                                                                                                                                                                                                                                                                                                                                                                                                                           |

| Intersections | No. of overlapping DMPs | List of overlapping DMPs                                                                                                                                                                                                                                                                                                                                                                                                                                                                                                                                                                                                                                                                                                                                                                                                                                                                                                                                                                                                                                                                                                                               |
|---------------|-------------------------|--------------------------------------------------------------------------------------------------------------------------------------------------------------------------------------------------------------------------------------------------------------------------------------------------------------------------------------------------------------------------------------------------------------------------------------------------------------------------------------------------------------------------------------------------------------------------------------------------------------------------------------------------------------------------------------------------------------------------------------------------------------------------------------------------------------------------------------------------------------------------------------------------------------------------------------------------------------------------------------------------------------------------------------------------------------------------------------------------------------------------------------------------------|
|               |                         | cg20237264,cg22062537,cg21300361,cg07518330,cg06366791,cg26408612,cg17951488,cg07628769,cg26701510                                                                                                                                                                                                                                                                                                                                                                                                                                                                                                                                                                                                                                                                                                                                                                                                                                                                                                                                                                                                                                                     |
| - ASD+CHD8    | 101                     | cg15726387,cg13606720,cg26824826,cg14570121,cg11111835,cg24505687,cg01810763,cg16678686,cg03601368,cg00053536,cg17129519,cg17484267,cg07730946,cg04102427,cg12810701,cg13770865,cg00837103,cg02169692,cg15501415,cg09536337,cg10211626,cg20468462,cg04730459,cg10202544,cg23014672,cg24351819,cg25513090,cg27547695,cg23806014,cg08428949,cg18699242,cg03085932,cg20255560,cg16452272,cg26075252,cg04072156,cg25151803,cg23087661,cg11379605,cg21515494,cg18920490,cg03567106,cg10945028,cg08136070,cg00445013,cg06438114,cg00590330,cg25964019,cg18183019,cg24337318,cg18822580,cg18758405,cg10071848,cg09425611,cg20465830,cg00975912,cg07020453,cg05444548,cg24803614,cg19075506,cg01864361,cg03514928,cg09421589,cg03798915,cg20723844,cg07236884,cg08889636,cg08005007,cg09041268,cg12190125,cg26171505,cg19717943,cg26795352,cg10805511,cg22706070,cg22993878,cg16773563,cg15564547,cg26953096,cg00984715,cg18823499,cg17837127,cg27072545,cg06385000,cg04154142,cg02401554,cg20033808,cg06421197,cg03331853,cg16608772,cg07131553,cg18221988,cg04161784,cg17291922,cg16436164,cg12315011,cg14206365,cg03870862,cg17122301,cg14115346,cg19201533 |

**Supplementary Table S7.** Utilized gene expression microarrays/RNA-sequencing for the differential gene expression analysis of the target genes of ASD with 16p11.2del.

| Methylome data |          |        |                  | Transcriptome data |              |               |                     |         |
|----------------|----------|--------|------------------|--------------------|--------------|---------------|---------------------|---------|
| ProbeID        | Elements | Delta  | P <sub>FDR</sub> | GSE                | Gene ID      | Gene          | log <sub>2</sub> FC | q-value |
| cg22062537     | L1MB3    | -0.079 | 1.52E-04         | GSE25507           | 1553515_at   | <i>MYEOV2</i> | 0.107               | 0.0496  |
| cg13749477     | L1MB3    | -0.038 | 3.58E-04         | GSE25507           | 1553515_at   | <i>MYEOV2</i> | 0.107               | 0.0496  |
| cg07628769     | L1MB3    | -0.101 | 2.76E-03         | GSE25507           | 1553515_at   | <i>MYEOV2</i> | 0.107               | 0.0496  |
| cg01772945     | AluSq    | -0.048 | 2.81E-04         | GSE18123           | 205739_x_at  | <i>ZNF107</i> | 0.382               | 0.0017  |
| cg09168728     | HAL1     | 0.042  | 3.94E-03         | GSE18123           | 202651_at    | <i>LPGAT1</i> | 0.160               | 0.0038  |
| cg21300361     | AluY     | 0.024  | 1.39E-02         | GSE18123           | 1553640_at   | <i>XKR6</i>   | -0.949              | 0.0206  |
| cg21300361     | AluY     | 0.024  | 1.39E-02         | GSE25507           | 1553640_at   | <i>XKR6</i>   | 0.134               | 0.0112  |
| cg01270736     | AluJb    | -0.037 | 1.67E-02         | GSE25507           | 207289_at    | <i>MMP25</i>  | 0.193               | <0.0001 |
| cg26620682     | L1PA2    | -0.058 | 2.06E-02         | GSE28521_FC        | ILMN_1765641 | <i>SEMA3A</i> | -0.200              | 0.0343  |
| cg26620682     | L1PA2    | -0.058 | 2.06E-02         | GSE59288           | 10371        | <i>SEMA3A</i> | -0.590              | 0.0139  |
| cg05073382     | L1MA7    | 0.153  | 2.90E-02         | GSE89594           | A_23_P258912 | <i>MYOM2</i>  | -1.611              | 0.0114  |
| cg11438448     | AluSx4   | -0.014 | 3.64E-02         | GSE18123           | 233429_at    | <i>SPEF2</i>  | -0.285              | 0.0484  |
| cg10059324     | L1MC4a   | 0.050  | 3.68E-02         | GSE59288           | 8863         | <i>PER3</i>   | 0.296               | 0.0269  |
| cg11859345     | AluSp    | -0.031 | 4.74E-02         | GSE18123           | 228766_at    | <i>CD36</i>   | 0.171               | 0.0249  |
| cg11859345     | AluSp    | -0.031 | 4.74E-02         | GSE18123           | 206488_s_at  | <i>CD36</i>   | 0.273               | 0.0076  |
| cg11859345     | AluSp    | -0.031 | 4.74E-02         | GSE25507           | 209554_at    | <i>CD36</i>   | 0.099               | 0.0131  |
| cg25283432     | L1MA8    | 0.004  | 4.82E-02         | GSE25507           | 232421_at    | <i>SCARB1</i> | 0.116               | 0.0189  |

**Supplementary Table S8.** Utilized gene expression microarrays/RNA-sequencing for the differential gene expression analysis of the target genes of ASD with *CHD8* variant.

| Methylome data |          |        |                  | Transcriptome data |                 |          |                     |         |
|----------------|----------|--------|------------------|--------------------|-----------------|----------|---------------------|---------|
| ProbeID        | Elements | Delta  | P <sub>FDR</sub> | GSE                | Gene ID         | Gene     | log <sub>2</sub> FC | q-value |
| cg10071848     | AluJb    | -0.033 | 4.39E-02         | GSE59288           | 5826            | ABCD4    | 0.39                | 0.0078  |
| cg07730946     | AluJb    | -0.027 | 1.28E-02         | GSE42133           | ILMN_1684585    | ACSL1    | -0.24               | 0.0344  |
| cg12934569     | AluSx    | -0.043 | 3.19E-02         | GSE42133           | ILMN_1684585    | ACSL1    | -0.24               | 0.0344  |
| cg11111835     | L1MA3    | -0.020 | 3.59E-02         | GSE18123           | 1553603_s_at    | ATL2     | 0.28                | 0.0248  |
| cg11111835     | L1MA3    | -0.020 | 3.59E-02         | GSE18123           | 237968_at       | ATL2     | -0.25               | 0.0492  |
| cg04154142     | AluSx1   | -0.063 | 1.10E-02         | GSE42133           | ILMN_1672596    | BCAR1    | -0.09               | 0.0127  |
| cg04154142     | AluSx1   | -0.063 | 1.10E-02         | GSE18123           | 223116_at       | BCAR1    | -0.26               | 0.0226  |
| cg14115346     | L1MB3    | -0.038 | 2.01E-02         | GSE18123           | 205750_at       | BPHL     | 0.28                | 0.0097  |
| cg10211626     | AluSx1   | -0.059 | 2.82E-03         | GSE59288           | 79640           | C22orf46 | 0.56                | 0.0002  |
| cg17129519     | AluSg    | 0.097  | 3.60E-02         | GSE64018           | ENSG00000204564 | C6orf136 | -0.18               | 0.0430  |
| cg17129519     | AluSg    | 0.097  | 3.60E-02         | GSE28521_TC        | ILMN_1813236    | C6orf136 | -0.30               | <0.0001 |
| cg06421197     | AluJo    | -0.034 | 2.66E-02         | GSE18123           | 206011_at       | CASP1    | 0.14                | 0.0122  |
| cg06421197     | AluJo    | -0.034 | 2.66E-02         | GSE42133           | ILMN_2326509    | CASP1    | -0.16               | 0.0258  |
| cg06421197     | AluJo    | -0.034 | 2.66E-02         | GSE42133           | ILMN_2326512    | CASP1    | -0.17               | 0.0213  |
| cg06421197     | AluJo    | -0.034 | 2.66E-02         | GSE42133           | ILMN_1727762    | CASP1    | -0.25               | <0.0001 |
| cg06421197     | AluJo    | -0.034 | 2.66E-02         | GSE59288           | 834             | CASP1    | 0.61                | 0.0096  |
| cg13606720     | L1ME3F   | -0.044 | 1.25E-02         | GSE42133           | ILMN_3248676    | CBWD3    | -0.11               | 0.0180  |
| cg11379605     | AluJb    | -0.033 | 3.59E-02         | GSE59288           | 965             | CD58     | 0.47                | 0.0159  |
| cg11379605     | AluJb    | -0.033 | 3.59E-02         | GSE18123           | 222061_at       | CD58     | 0.36                | 0.0256  |
| cg11379605     | AluJb    | -0.033 | 3.59E-02         | GSE64018           | ENSG00000116815 | CD58     | 0.50                | 0.0328  |
| cg09425611     | L1MB7    | -0.028 | 3.60E-02         | GSE18123           | 209616_s_at     | CES1     | 0.44                | 0.0025  |
| cg00053536     | AluSx    | -0.028 | 4.62E-02         | GSE25507           | 206274_s_at     | CROCC    | 0.12                | 0.0458  |
| cg09604414     | AluSx    | -0.067 | 3.36E-02         | GSE25507           | 229079_at       | EHMT2    | 0.09                | 0.0471  |
| cg22706070     | L1MC5    | -0.008 | 4.96E-02         | GSE25507           | 229079_at       | EHMT2    | 0.09                | 0.0471  |
| cg14570121     | FLAM_A   | -0.031 | 3.75E-02         | GSE59288           | 2068            | ERCC2    | -0.26               | 0.0149  |



|            |        |        |          |             |                 |        |       |         |
|------------|--------|--------|----------|-------------|-----------------|--------|-------|---------|
| cg24803614 | AluSc8 | 0.051  | 3.41E-02 | GSE59288    | 2495            | FTH1   | 0.42  | 0.0045  |
| cg03085932 | L1PA6  | -0.043 | 4.59E-02 | GSE25507    | 220249_at       | HYAL4  | 0.12  | 0.0179  |
| cg08005007 | L1HS   | -0.031 | 9.50E-03 | GSE18123    | 235111_at       | LSAMP  | -0.23 | 0.0386  |
| cg08005007 | L1HS   | -0.031 | 9.50E-03 | GSE18123    | 229244_at       | LSAMP  | -0.25 | 0.0303  |
| cg22993878 | L1MB3  | -0.021 | 7.98E-03 | GSE25507    | 1553515_at      | MYEOV2 | 0.11  | 0.0496  |
| cg03514928 | L1PA17 | -0.022 | 4.70E-02 | GSE59288    | 4897            | NRCAM  | -0.31 | 0.0104  |
| cg20723844 | AluY   | -0.061 | 1.63E-02 | GSE42133    | ILMN_1789616    | NUPL2  | -0.09 | 0.0221  |
| cg00984715 | AluSq  | -0.049 | 2.24E-02 | GSE59288    | 5465            | PPARA  | 0.51  | 0.0149  |
| cg00984715 | AluSq  | -0.049 | 2.24E-02 | GSE18123    | 1560981_a_at    | PPARA  | -0.24 | 0.0256  |
| cg00984715 | AluSq  | -0.049 | 2.24E-02 | GSE18123    | 1558631_at      | PPARA  | -0.46 | 0.0091  |
| cg24351819 | AluSp  | -0.026 | 4.74E-02 | GSE59288    | 55170           | PRMT6  | -0.33 | 0.0057  |
| cg09521141 | AluSg7 | -0.045 | 2.63E-02 | GSE28521_FC | ILMN_1765641    | SEMA3A | -0.20 | 0.0343  |
| cg09521141 | AluSg7 | -0.045 | 2.63E-02 | GSE59288    | 10371           | SEMA3A | -0.59 | 0.0139  |
| cg26620682 | L1PA2  | -0.041 | 3.46E-02 | GSE28521_FC | ILMN_1765641    | SEMA3A | -0.20 | 0.0343  |
| cg26620682 | L1PA2  | -0.041 | 3.46E-02 | GSE59288    | 10371           | SEMA3A | -0.59 | 0.0139  |
| cg18221988 | L1PA2  | -0.043 | 4.99E-02 | GSE18123    | 210804_x_at     | SLC8A1 | -0.30 | 0.0392  |
| cg18221988 | L1PA2  | -0.043 | 4.99E-02 | GSE25507    | 1565306_a_at    | SLC8A1 | 0.18  | 0.0189  |
| cg18221988 | L1PA2  | -0.043 | 4.99E-02 | GSE59288    | 6546            | SLC8A1 | -0.41 | 0.0245  |
| cg18221988 | L1PA2  | -0.043 | 4.99E-02 | GSE18123    | 235518_at       | SLC8A1 | 0.29  | 0.0057  |
| cg18221988 | L1PA2  | -0.043 | 4.99E-02 | GSE64018    | ENSG00000183023 | SLC8A1 | -0.26 | 0.0430  |
| cg07020453 | L1MDa  | -0.009 | 4.57E-02 | GSE18123    | 217968_at       | TSSC1  | -0.21 | 0.0185  |
| cg08428949 | AluSz  | -0.028 | 1.24E-02 | GSE64018    | ENSG00000128881 | TTBK2  | -0.15 | 0.0352  |
| cg01810763 | AluSx1 | -0.053 | 4.42E-02 | GSE64018    | ENSG00000198431 | TXNRD1 | 0.30  | 0.0443  |
| cg11191744 | AluY   | -0.050 | 4.57E-02 | GSE64018    | ENSG00000198431 | TXNRD1 | 0.30  | 0.0443  |
| cg02169692 | AluSx  | -0.109 | 2.75E-02 | GSE42133    | ILMN_3240420    | USP18  | -0.31 | 0.0250  |
| cg02169692 | AluSx  | -0.109 | 2.75E-02 | GSE42133    | ILMN_3240420    | USP18  | -0.31 | 0.0250  |
| cg18699242 | AluSx  | -0.106 | 4.48E-02 | GSE42133    | ILMN_3240420    | USP18  | -0.31 | 0.0250  |
| cg18699242 | AluSx  | -0.106 | 4.48E-02 | GSE42133    | ILMN_3240420    | USP18  | -0.31 | 0.0250  |
| cg15726387 | AluSz6 | -0.044 | 9.50E-03 | GSE18123    | 220079_s_at     | USP48  | 0.10  | 0.0053  |
| cg15726387 | AluSz6 | -0.044 | 9.50E-03 | GSE18123    | 225925_s_at     | USP48  | 0.15  | <0.0001 |

|            |       |        |          |             |              |         |       |        |
|------------|-------|--------|----------|-------------|--------------|---------|-------|--------|
| cg06385000 | AluSc | -0.041 | 2.16E-02 | GSE18123    | 227434_at    | WBSCR17 | -0.46 | 0.0392 |
| cg06385000 | AluSc | -0.041 | 2.16E-02 | GSE28521_FC | ILMN_1701557 | WBSCR17 | -0.19 | 0.0402 |
| cg06385000 | AluSc | -0.041 | 2.16E-02 | GSE28521_TC | ILMN_1701557 | WBSCR17 | -0.23 | 0.0485 |
| cg03870862 | L1MB3 | -0.063 | 3.18E-02 | GSE59288    | 23144        | ZC3H3   | 0.27  | 0.0193 |

**Supplementary Table S9.** Characteristics of the Infinium450K datasets in the present study

including ASD and non-ASD. The numbers of patients for each group are given for each gender.

The ages for each group are given as means  $\pm$  standard deviation.

| Groups                                                   | Gender |        | Age               |
|----------------------------------------------------------|--------|--------|-------------------|
|                                                          | Male   | Female |                   |
| GSE113967: Blood                                         |        |        |                   |
| ASD                                                      | 45     | 7      | 10.45 $\pm$ 3.31  |
| Non-ASD                                                  | 33     | 15     | 10.22 $\pm$ 3.95  |
| ASD+ <i>CHD8</i>                                         | 11     | 4      | 8.97 $\pm$ 4.11   |
| ASD+16p11.2 del                                          | 6      | 1      | 6.78 $\pm$ 4.05   |
| GSE131706: Subventricular zone of the lateral ventricles |        |        |                   |
| ASD                                                      | 17     | -      | 28.85 $\pm$ 21.17 |
| Non-ASD                                                  | 17     | -      | 27.37 $\pm$ 19.56 |
| GSE80017: Prefrontal cortex                              |        |        |                   |
| ASD                                                      | 6      | 3      | NA                |
| Non-ASD                                                  | 5      | 4      | NA                |
